# Supplementary material
Source: publisher figshare collection journal article supplement (https://acs.figshare.com/ndownloader/files/26620941)
Supplement: Supplementary file 1 [file 26620941]

- 1
- 2
- 3
- 4
- 5
- 6
- 7
- 8
- 9
- 10
- 11
- 12
- 13
- 14
- 15
- 16
- 17
- 18
- 19
- 20
- 21

- 2
- 3
- 4
- 5
- 6
- 7
- 8
- 9
- 10
- 11
- 12
- 13
- 14
- 15
- 16
- 17
- 18
- 19
- 20
- 21

- 3
- 4
- 5
- 6
- 7
- 8
- 9
- 10
- 11
- 12
- 13
- 14
- 15
- 16
- 17
- 18
- 19
- 20
- 21

4  
5  
6  
7  
8  
9  
10  
11  
12  
13  
14  
15  
16  
17  
18  
19  
20  
21

- 5
- 6
- 7
- 8
- 9
- 10
- 11
- 12
- 13
- 14
- 15
- 16
- 17
- 18
- 19
- 20
- 21

15  
16  
17  
18  
19  
20  
21

16  
17  
18  
19  
20  
21

17  
18  
19  
20  
21

18  
19  
20  
21

19  
20  
21

20  
21

21

22    **Text**

23    Maintenance of Zebrafish.

24    Sample Preparations.

25    Screening by High Resolution Mass Spectrometry.

26    Visualized Networking of Mass Signals.

27    Identifications of Mass Signals.

28    Validation of Identified Metabolites.

29    Quantification of Chemicals in Exposed Embryos.

30    Stable Isotope Tracing.

31    Rescue Experiments.

32    Enzyme-linked Immunosorbent Assay (ELISA) Tests.

33    Assessment of Thrombotic Symptoms.

34    **Table**

35    Table S1. Chemicals, enzyme-linked immunosorbent assay kits, software, and standards of  
36    metabolites used for method optimization, metabolite identification, rescue experiments, and  
37    isotope tracing.

38    Table S2. The major affected metabolic processes, including major metabolites with  
39    statistically different levels compared with those of the control group and the corresponding  
40    exposure chemicals.

41    Table S3. Optimized instrumental and MRM conditions of the target chemicals.

42    Table S4. List of materials and calibration standards in the kits.

43    **Figure**

44 Figure S1. A workflow diagram of this study.

45 Figure S2. PCA analysis of screened metabolites during the developing stages of zebrafish  
46 embryos (6 to 120 h post fertilization), and concentration changes of representative molecules  
47 of the screened metabolites.

48 Figure S3. Selected molecules obtained by network analysis and OPLSDA.

49 Figure S4. Distributions of exposure chemicals and their metabolites detected in the auto-  
50 generated network.

51 Figure S5-S24. Mass spectra of identified metabolites and corresponding standards detected in  
52 zebrafish embryo.

53 Figure S25. Dose-response of LPCs, LPEs, linoleate related PUFAs, PLs, CL and Sep in  
54 zebrafish embryos after exposures to pp'-DDE, TPHP, PFOS, and TCS.

55 Figure S26-S27. Metabolic pathways between CLs and linoleate related PUFAs validated by  
56 stable isotope tracing.

57 Figure S28-S30. Metabolic pathways between CLs and linoleate related PUFAs validated by  
58 rescue experiments.

59 Figure S31. Levels of TAZ in zebrafish embryos exposed to the 11 chemicals.

60 Figure S32. Variations in CL levels in zebrafish embryos exposed to TCS or co-exposed to TCS  
61 and ISO.

62 Figure S33. Levels of ACAs, PGI<sub>2</sub>, and TXA<sub>2</sub> in zebrafish embryos exposed to the CL  
63 disrupting chemicals (pp'-DDE, TPHP, PFOS, and TCS) and CL at different concentrations.

64 Figure S34. O-dianisidine staining of heart RBCs and the RBC intensities in zebrafish embryos  
65 exposed to pp'-DDE, TPHP, PFOS and PHZ at different concentrations. Heart rates and

66 histopathological examination of thrombus in blood vessels of zebrafish embryo exposed to

67 PHZ.

68

69

70

71

## **Maintenance of Zebrafish.**

AB strain wild-type zebrafish (4–5 months old) were maintained in purified aquaculture water (pH of  $7.2 \pm 0.2$ ) at  $27 \pm 1^\circ\text{C}$  with a photoperiod of 14/10 (light/dark), and were fed twice daily with live brine shrimp (*Artemia nauplii*). Adult male and female zebrafish were paired at a ratio 2:1 in a breeding tank overnight and separated with a mesh screen before spawning. Spawning and fertilization started within 30 min after removal of the screen. Embryos were collected at 2 hours post-fertilization (hpf) and rinsed twice with purified aquaculture water. Normally developed embryos were screened under a stereomicroscope (M165FC, Leica) and collected for exposure experiments.

## **Sample Preparations.**

First, 800  $\mu\text{L}$  of iced methanol was added to the collected embryos, which were then homogenized in the lysing matrix tubes at a speed of 6.0 m/s for 30 s. The sample mixtures were, then divided into two equal portions and transferred into 4-mL vials for separate extraction of polar (fraction 1, F1) and non-polar (fraction 2, F2) components. F1 was fully deproteinized with 1.1 mL of ice-cold methanol. To F2, 100  $\mu\text{L}$  of ultrapure water was added and vortexed for 2 min to precipitate proteins before the addition of 1.4 mL of ice-cold MTBE. All F1 and F2 fractions were sonicated at  $4^\circ\text{C}$  for 30 min and then centrifuged for 20 min ( $4^\circ\text{C}$ , 7,500 rpm). The supernatants of F1 and F2 were collected and then lyophilized to dryness. The residues were re-dissolved in 200  $\mu\text{L}$  of methanol/water (1:1, v:v) (F1) or chloroform/methanol/water (1:2:0.8, v:v:v) (F2), and filtered through a hydrophobic PTFE filter (13 mm, 0.22  $\mu\text{m}$ ) for Ultraperformance Liquid Chromatography Quadrupole Time-of-flight Mass Spectrometry (UPLC-QTOF-MS) analysis. The extraction processes have been

validated by analysis of embryos spiked with  $^{13}\text{C}$ -labeled Lauric acid, D7-SPH, 16:0-D31 SM, 16:0 D31-18:1 PI, 16:0 D31-18:1 PC, and 16:0 D31-18:1 PG, and the recoveries were in the range of 73-102% and 65-91% for polar and non-polar fractions, respectively.

#### **Screening by High Resolution Mass Spectrometry.**

A UPLC-QTOF-MS system (Xevo G2, Waters) operating in both the positive ( $\text{ESI}^+$ ) and negative ( $\text{ESI}^-$ ) electrospray ionization modes was used to obtain the full mass spectra of the metabolites in the zebrafish embryos. Chromatographic separation was performed on 5- $\mu\text{L}$  samples via an ACQUITY UPLC BEH C8 column (2.1 mm  $\times$  50 mm, 1.7  $\mu\text{m}$  particle size) at 40°C: solvent A was 10 mM ammonium acetate in ultrapure water, solvent B was acetonitrile, and the flow rate was 0.3 mL/min. The chromatographic elution programs in both the positive and negative modes were as follows: 30% B was initially held for 0.5 min, and the eluent was then ramped to 80% B by 3.5 min and 100% B by 6.0 min, and then held for 0.5 min, before being returned to the initial conditions by 6.5 min and equilibrated for 1.5 min before injection of the next sample. The UPLC-QTOF-MS was operated at a resolution of 25,000 and 1 s scan time. The high-accuracy  $\text{MS}^E$  data were acquired in continuum mode with an  $m/z$  range of 50–1,600 for the precursor ions and corresponding fragments. In low energy mode, data were collected with a constant collision energy of 3 V, and in elevated energy mode, the collision energy was ramped from 15 to 55 V. The other optimized MS parameters were as follows: source capillary voltage, 3 kV ( $\text{ESI}^+$ ) or 2 kV ( $\text{ESI}^-$ ); sampling cone voltage, 30 V ( $\text{ESI}^+$ ) or 45 V ( $\text{ESI}^-$ ); extraction cone voltage, 4 V; source temperature, 150°C; desolvation temperature, 350°C ( $\text{ESI}^+$ ) or 450°C ( $\text{ESI}^-$ ); cone gas flow, 50 L/h; and desolvation gas flow, 600 L/h ( $\text{ESI}^+$ ) or 800 L/h ( $\text{ESI}^-$ ).

The UHPLC-Orbitrap MS (Q-Exactive system, Thermo Fischer Scientific) was further used to confirm and/or identify the screened metabolites in embryos. In the mode of full scan MS/data-dependent (dd) MS<sup>2</sup>, the full scan resolution was set at 70,000, and the ddMS<sup>2</sup> resolution was set at 17,500. The adjusted parameters for electrospray ionization mode were set as follows: spray voltages of 3.5 kV and 2.8 kV were used for positive and negative modes, respectively; the capillary temperature was maintained at 325°C; and the sheath gas flow and auxiliary gas flow were set to 40 Arb and 10 Arb, respectively. The S-lens RF level was 50.

### **Visualized Networking of Mass Signals.**

A visualized network of all screened mass signals was automatically generated through correlation network analysis.<sup>1</sup> A correlation matrix was constructed through analysis of unique signal-signal pairs on the basis of all mass signals detected in samples from different exposed groups. The correlated pairs were selected with absolute values of the Pearson correlation coefficient (R) higher than 0.7<sup>2</sup> and further processed in Gephi 0.9.2 (Gephi Consortium, France) to generate the correlation network. Each discrete molecule was represented as a node, and the corresponding pairwise connections were represented as links between two paired compounds in the network. The layout algorithms of OpenOrd and Force Atlas were used to automatically generate the core clusters of the compounds. The sizes of nodes were set according to the signal abundances for embryos from the control group. The nodes were shaded in different colors showing the degrees of signal intensity: warm colors from yellow to purple represented a gradual increase in intensity, and cool colors from blue to green represented a corresponding decrease.

### **Identifications of Mass Signals.**

Preliminary analysis of embryos was used to determine the general ionizations of metabolites molecules in zebrafish embryos. The adduct ion forms in ESI<sup>+</sup> mode were selected as [M+H]<sup>+</sup>, [M+NH<sub>4</sub>]<sup>+</sup>, [M+Na]<sup>+</sup>, [M+K]<sup>+</sup>, [M+H-H<sub>2</sub>O]<sup>+</sup>, [M+H-2H<sub>2</sub>O]<sup>+</sup>, [M+CH<sub>3</sub>OH+H]<sup>+</sup>, [M+ACN+H]<sup>+</sup>, [M+ACN+Na]<sup>+</sup>, [2M+H]<sup>+</sup>, [2M+Na]<sup>+</sup>, [M+2H]<sup>2+</sup>, and [M+2H-2H<sub>2</sub>O]<sup>2+</sup>; and those in ESI<sup>-</sup> mode were [M-H]<sup>-</sup>, [M-H<sub>2</sub>O-H]<sup>-</sup>, [M+FA-H]<sup>-</sup>, [M+CH<sub>3</sub>COO]<sup>-</sup>, [M+Cl]<sup>-</sup>, [2M-H]<sup>-</sup>, [M-2H]<sup>2-</sup>, [M+Na-2H]<sup>2-</sup>, and [M+K-2H]<sup>2-</sup>. In peak identification, mass signals were identified by software-based searching the following databases: the Human Metabolome Database (HMDB), Kyoto Encyclopedia of Genes and Genomes (KEGG), Lipid Maps, Mass Bank, PubChem, and PubMed.<sup>1</sup> The remaining unmatched mass signals were then identified by searching the National Institute of Standards and Technology (NIST), BioCyc, Cayman chemical, Small Molecule Pathway Database (SMPDB), and the Manchester Centre for Integrative Systems Biology (MCISB) databases.<sup>3-5</sup> The mass tolerances for precursors and corresponding fragment ions were set to 10 ppm.

The identified and unknown signals were further confirmed and/or identified with UHPLC-Orbitrap HRMS with higher resolutions and sensitivities. The raw data obtained from the UHPLC-Q-Exactive<sup>TM</sup> were processed in Compound Discoverer 2.1 software (Thermo Fisher, Waltham, MA). Mass signals were identified by software-based searching the corresponding database mzCloud.<sup>6</sup> The mass tolerance was set to 5 ppm, and peaks with MS/MS spectra containing at least two product ions matched with the database were selected. The final identification results retained the peaks with higher abundances and matching rates.

The auto-generated network enhanced the confidence of metabolite identifications, since signals that belonged to the same cluster generally have close metabolic relationships. The



optimal identification was achieved under the guidance of signals with high identification levels in each cluster. The duplicate identified results were manually screened in ESI<sup>+</sup> and ESI<sup>-</sup> modes for both F1 and F2 fractions.

### **Validation of Identified Metabolites.**

All metabolites were identified on the basis of the MS and corresponding fragmentation information recorded in online databases, which were classified as a second level of identification.<sup>7</sup> A network was generated, and the metabolites were divided into several clusters. Approximately 77 major metabolites from each core cluster with important metabolic significance or high detection frequency were selected for further validation. The corresponding 77 commercial standards with the same or similar structures were purchased. The MS and fragmentation patterns generated by collision-induced dissociations in the MS<sup>E</sup> analysis were compared between samples and standards to achieve first-level identification of the crucial metabolites.

### **Quantification of Chemicals in Exposed Embryos.**

Concentrations of chemicals were determined in the exposed embryos. The protocols of sample preparations for determining chemical concentrations were based on previous studies.<sup>8-12</sup> After 96 h exposure, embryos were collected and rinsed with deionized water for three times. The embryos were transferred into 2 mL pre-weighed glass bottles, weighted after removing excess water, and stored at -80 °C until analysis. 10 embryos were homogenized as one sample in 400 µL deionized water, and four replicate samples were analyzed per treatment. The pooled samples were added with surrogate standards and underwent liquid-liquid extraction for gas chromatography coupled with mass spectrometry (GC-MS) or UPLC-MS/MS analysis.

Phenolic compounds including BPA, 6OHBDE47, and TCS were quantified relative to  $^{13}\text{C}$ -BPA; TPHP and TPT were quantified relative to TPHP- $d_{15}$ ; PCB153 and pp'-DDE were quantified relative to PCB121; B(a)P was quantified relative to perylene- $d_{14}$ ; and PFOS, PFOA, and DEHP were quantified relative to  $^{13}\text{C}$ -PFOS,  $^{13}\text{C}$ -PFOA, and DEHP- $d_4$ , respectively.

Pooled embryo samples used for analysis of BPA, 6OHBDE47, TCS, TPT, PCB153, pp'-DDE, and B(a)P were extracted with 1 mL hexane four times. The aquatic fraction was then passed through sodium sulfate to remove any moisture and eluted with 1 mL of hexane and 1 mL of dichloromethane. The extracts were dried and re-dissolved in 100  $\mu\text{L}$  hexane for GC-MS analysis of PCB153, pp'-DDE, and B(a)P, or re-dissolved in 100  $\mu\text{L}$  methanol for UPLC-MS/MS analysis of BPA, 6OHBDE47, TCS, and TPT.

Pooled samples used for quantification of PFOS and PFOA were added with 1 mL TBAS and 2 mL  $\text{Na}_2\text{CO}_3$ , and then extracted with 5 mL MTBE. Supernatant extracts were transferred after vigorously shaking at 3000 rpm for 15 min, sonicating for 15 min, and centrifuging at 3500 rpm for 15 min. Samples used for quantification of DEHP were firstly added with 800  $\mu\text{L}$  acetonitrile and then extracted with 1 mL hexane. Supernatant extracts were transferred after sonicating for 20 min, and centrifuging at  $2500 \times g$  for 5 min. Samples used for quantification of TPHP were extracted with 3 mL acetonitrile. Supernatant extracts were transferred after centrifuging at 400 rpm for 10 min. The extraction of PFOS, PFOA, DEHP, and TPHP repeated three times, and the extracts were dried and concentrated to 100  $\mu\text{L}$  (methanol) for UPLC-MS/MS analysis. Recovery experiments were conducted to checked the analytical procedures, and recovery rates of target compounds were in the range of 78.6-100.4% in zebrafish embryos.

PCB153, pp'-DDE, and B(a)P were determined by a GC-MS (6890/5973, Agilent) equipped with a fused silica capillary column (DB-5MS, 30 m × 250 μm, 0.25 μm). The injector was maintained at 250 °C at a splitless mode. The column oven temperature was programmed to increase from 70 °C to 220 °C (held 3 min) at the rate of 20 °C/min, to 300 °C (held 5 min) at the rate of 20 °C/min. The interface temperature and ion source were held at 280 °C and 250 °C, respectively. The carrier gas was helium at a constant flow rate of 2 mL/min.

A UPLC-MS/MS system (Xevo TQ-XS, Waters) operating in both the positive (ESI<sup>+</sup>) and negative (ESI<sup>-</sup>) electrospray ionization modes was used to determine the concentrations of BPA, 6OHBDE47, TCS, TPT, PFOS, PFOA, DEHP, and TPHP according to previous studies.<sup>10-13</sup> DEHP, TPHP, and TPT were determined in positive mode and BPA, 6OHBDE47, TCS, PFOS, and PFOA were analyzed in negative mode. Chromatographic separation was conducted using an ACQUITY UPLC BEH C8 column (2.1 mm × 50 mm, 1.7 μm particle size) at 40°C, and the flow rate and injection volume were 0.3 mL/min and 5 μL, respectively. 5 mM ammonium acetate in ultrapure water (A) and acetonitrile (B) were used as mobile phases. 25% B was initially held for 0.5 min, and the eluent was then ramped to 95% by 6.0 min, and then held for 2 min, before being returned to the initial condition by 8.1 min and equilibrated for 1.9 min before injection of the next sample. The optimum conditions in the ESI source were: source temperature, 150 °C; desolvation temperature, 500 °C; capillary voltage, 3.00 kV (ESI<sup>+</sup>) or 1.00 kV (ESI<sup>-</sup>); desolvation gas flow, 1000 L/h (ESI<sup>+</sup>) or 600 L/h (ESI<sup>-</sup>); and cone gas flow 150 L/h. Quantitative analysis of the target chemicals was performed in multi-selected reaction monitoring (MRM), and the dwell time were automatically selected at 20 ms (ESI<sup>+</sup>) and 60 ms (ESI<sup>-</sup>). The optimized MRM conditions of target chemicals were provided in Table S3.

## **Stable Isotope Tracing.**

<sup>13</sup>C-labeled linoleate was used to track the pathways between linoleate related PUFAs and CLs. Zebrafish embryos were co-exposed to pp'-DDE and linoleate or <sup>13</sup>C-labeled linoleate according to the exposure conditions listed above. The exposure concentrations of pp'-DDE and linoleate/<sup>13</sup>C-linoleate were 100 and 1000 ng/mL, respectively. Samples from the groups exposed to linoleate and <sup>13</sup>C-linoleate were screened with UHPLC-Orbitrap HRMS, and the differences in signals from the two groups were compared. Only the signals with differences of 1.0034 (MW difference between <sup>13</sup>C-labeled Lin and Lin) from the two groups were selected and identified. The identified <sup>13</sup>C-labeled metabolites provided pathway information allowing us to link the metabolism of linoleate to that of CLs.

## **Rescue Experiments.**

Rescue experiments were conducted for further validation of the associations between linoleate related PUFAs and CLs. Four chemicals including pp'-DDE, TPHP, PFOS, and TCS were found to elevate the levels of CLs and to decrease the levels of linoleate/arachidonate/ $\alpha$ -linoleate. Thus, pp'-DDE and TCS were selected and used for zebrafish embryo co-exposure with linoleate/arachidonate/ $\alpha$ -linoleate separately. Levels of CLs in embryos were determined and compared between the pp'-DDE/TCS single exposure group and pp'-DDE/TCS+linoleate/arachidonate/ $\alpha$ -linoleate co-exposed groups. The associations between linoleate related metabolites and CLs could be theoretically validated if the addition of linoleate/arachidonate/ $\alpha$ -linoleate significantly inhibited the increase in CLs induced by exposure to selected chemicals. The exposure concentrations of pp'-DDE, TCS, and linoleate/arachidonate/ $\alpha$ -linoleate were 100 ng/mL, 50 ng/mL, and 1000 ng/mL, respectively.

The same method was also used to verify the relationship between ISO and CLs. TCS was selected because it is the only chemical that simultaneously induced a decrease in ISO and an increase in CLs. The exposure concentrations of ISO and TCS were 2000 and 50 ng/mL, respectively. The relationship between ISO and CLs could be theoretically validated if the addition of ISO significantly inhibited the increase in CLs induced by TCS.

#### **Enzyme-linked Immunosorbent Assay (ELISA) Tests.**

The catalysis of the metabolic reactions is governed by the enzymes of the regulatory network, and ELISA has been widely used to assess the activities of enzymes in the metabolic conversion of lipids.<sup>14-18</sup> In this study, the enzymes including LPLAT, LCLAT, PLA<sub>2</sub>, CLS, TAZ, and XOD, which catalyzes the synthesis and/or metabolism of PLs, LPLs, and CLs, have been validated based on the reported studies.<sup>19-22</sup> The levels of ACA antibodies including IgA, IgG, and IgM, and prostaglandins (PGI<sub>2</sub> and TXA<sub>2</sub>) associated with thrombosis were generally measured by a standardized ELISA.<sup>23-25</sup> The analyses were conducted with kits designed for zebrafish. The embryos exposed to the 11 target chemicals were collected for the ELISA tests, and the embryos exposed to CL (18:1 CL) at different concentrations were also subjected to the ELISA tests. A total of 100 exposed embryos were uniformly collected per sample. ELISA tests were conducted according to the instructions provided by the kits. The materials in the kits were shown in Table S4. All reagents were prepared before starting the assay procedure. About 50 µL of standard was added to the standard well. 10 µL of testing sample was added to the sample wells and then added with 40 µl sample diluent. No reagents were added to the blank wells. 100 µL of HRP-conjugate reagent were then added to each well, covered with an adhesive strip, and incubated for 60 min at 37 °C. After incubation, each well was aspirated, and rinsed with wash

solution (400  $\mu$ L), which were repeated for four times. After the last wash, remaining wash solutions were completely removed in each well. 50  $\mu$ L chromogen solution A and 50  $\mu$ L chromogen solution B were added to each well, and gently mixed and incubated for 15 min at 37°C. 50  $\mu$ L stop solution was finally added to the well, and the optical density at 450 nm were determined with a microplate reader (Multiskan FC, Thermo Scientific) within 15 min.

#### **Assessment of Thrombotic Symptoms.**

Determining the amount of heart red blood cells (RBCs) has been demonstrated to be a promising method for quantification of thrombosis.<sup>26,27</sup> pp'-DDE, TPHP, PFOS, and TCS were selected because of their potential to elevate the levels of CLs. Embryos were exposed to three levels (low, medium, and high) of each chemical, as described above. Embryos were also exposed to 18:1 CL at concentrations of 100 ng/mL, 500 ng/mL, and 2000 ng/mL. After exposure, all zebrafish were stained with O-dianisidine to quantify the heart RBCs in zebrafish.<sup>26,27</sup> A total of 25 zebrafish from each group were randomly chosen to be immobilized in 3% methyl cellulose. The heart RBC images were acquired in the identical lighting intensity at 80 $\times$  magnification under a dissecting stereomicroscope (SZX7, OLYMPUS, Japan) with a high-speed video camera (VertA1, China). NIS-Elements D3.10 image analysis software (Nikon) was subsequently used to estimate the average RBCs intensity for erythrocyte positive staining in the cardiac region. To confirm that PHZ-induced thrombus formation in the caudal vein was accompanied by a reduction of heart RBCs intensity, we performed histopathological examination after treatment. Zebrafish were first fixed in 4% paraformaldehyde (in 0.1 M phosphate-buffered saline) for 4 h at 4°C, and then dehydrated in graded series of ethanol solutions. Embedded zebrafish were longitudinally

sectioned at 5  $\mu\text{m}$  and stained with hematoxylin and eosin to acquire histological images at a  
400 $\times$  magnification under a histological microscope (Leica, Germany). Because tachycardia  
is another critical thrombotic symptom, the heart rate was measured in 96-hpf exposed  
embryos randomly selected from each group. The heart rates were counted and recorded under  
a stereomicroscope (M165FC, Leica).

**Table S1.** Chemicals, enzyme-linked immunosorbent assay kits, software, and standards of metabolites used for method optimization, metabolite identification, rescue experiments, and isotope tracing.

| REAGENT or RESOURCE                                                             | SOURCE                         | IDENTIFIER             |
|---------------------------------------------------------------------------------|--------------------------------|------------------------|
| Exposure chemicals                                                              |                                |                        |
| Bisphenol A (BPA)                                                               | Sigma-Aldrich                  | Cat#239658             |
| Benzo(a)pyrene (B(a)P)                                                          | Sigma-Aldrich                  | Cat#51968              |
| Bis(2-ethylhexyl) phthalate (DEHP)                                              | Sigma-Aldrich                  | Cat#36735              |
| 1,1-bis-(4-chlorophenyl)-2,2-dichloroethene (pp'-DDE)                           | Sigma-Aldrich                  | Cat#35487              |
| Perfluorooctanoate (PFOA)                                                       | Dr. Ehrenstorfer GmbH          | Cat#C15987150          |
| Perfluorooctane sulfonate (PFOS)                                                | Dr. Ehrenstorfer GmbH          | Cat#C15987120          |
| 2,2',4,4',5,5'-hexachlorobiphenyl (PCB153)                                      | Dr. Ehrenstorfer GmbH          | Cat#C20015300          |
| Triphenyl phosphate (TPHP)                                                      | Dr. Ehrenstorfer GmbH          | Cat#C17893000          |
| 6-hydroxy-2,2',4,4'-tetrabromodiphenyl ether (6OHBBDE47)                        | AccuStandard                   | Cat#HBDE-4005S-CN-0.2X |
| Triphenyltin chloride (TPT)                                                     | AccuStandard                   | Cat#P-526N             |
| Triclosan (TCS)                                                                 | Wellington Laboratories        | Cat#3380-34-5          |
| Internal/Surrogate standards                                                    |                                |                        |
| Bisphenol A- <sup>13</sup> C ( <sup>13</sup> C-BPA)                             | Santa Cruz                     | Cat#sc-217773          |
| Triphenyl-d <sub>15</sub> phosphate (TPHP-d <sub>15</sub> )                     | Bioruler                       | Cat#RH136701           |
| 2,3',4,5',6-Pentachlorobiphenyl (PCB121)                                        | Cambridge Isotope Laboratories | Cat#PCB-121            |
| 2,3-Benzoperylene-d <sub>14</sub> (perylene-d <sub>14</sub> )                   | AccuStandard                   | Cat#B204902            |
| D <sub>4</sub> - Bis(2-ethylhexyl) phthalate (DEHP-d <sub>4</sub> )             | ANPEL Laboratory               | Cat#CDAA-320013D4      |
| <sup>13</sup> C <sub>4</sub> -perfluorooctane sulfonate ( <sup>13</sup> C-PFOS) | Wellington Laboratories        | Cat#MPFCA-MXA          |
| <sup>13</sup> C <sub>4</sub> -perfluorooctanoate ( <sup>13</sup> C-PFOA)        | Wellington Laboratories        | Cat#MPFCA-MXA          |
| Reagents                                                                        |                                |                        |
| Methanol                                                                        | Thermo Fisher Scientific       | Cat#A452-4             |
| Acetonitrile                                                                    | Thermo Fisher Scientific       | Cat#A998-4             |
| Hexane                                                                          | Adamas                         | Cat#01226748           |
| Dichloromethane                                                                 | Adamas                         | Cat#01226780           |
| Sodium sulfate                                                                  | Acros                          | Cat#C19410             |
| Tetra-n-butyl ammonium hydrogen sulfate (TBAS)                                  | Energy Chemical                | Cat#A01A0100220250     |
| Sodium carbonate (Na <sub>2</sub> CO <sub>3</sub> )                             | Sigma-Aldrich                  | Cat#V900801            |



|                                                                            |                          |                              |
|----------------------------------------------------------------------------|--------------------------|------------------------------|
| Ammonium acetate                                                           | Dima-Tech                | Cat#50138                    |
| Formic acid                                                                | Dikma Technology         | Cat#50144                    |
| Methyl <i>tert</i> -butyl ether                                            | Aladdin Reagent          | Cat#B108115                  |
| Chloroform                                                                 | Xilong Scientific        | Cat#QC2182                   |
| Dimethyl sulfoxide                                                         | Aladdin Reagent          | Cat#D103273                  |
| PBS (pH of 7.4)                                                            | Thermo Fisher Scientific | Cat#C10010500BT              |
| O-dianisidine                                                              | Sigma-Aldrich            | Cat#D3252                    |
| Methyl cellulose                                                           | Sigma-Aldrich            | Cat#M6385                    |
| Paraformaldehyde                                                           | Sigma-Aldrich            | Cat#158127                   |
| Ethanol                                                                    | Aladdin Reagent          | Cat#E111962                  |
| Phenylhydrazine                                                            | Aladdin Reagent          | Cat#P108563                  |
| Enzyme-linked immunosorbent assay (ELISA) kit for zebrafish                |                          |                              |
| Zebrafish LPLAT ELISA kit                                                  | Meibiao Biotechnology    | Cat#MB-21297A                |
| Zebrafish LCLAT ELISA kit                                                  | Meibiao Biotechnology    | Cat#MB-21311A                |
| Zebrafish PLA <sub>2</sub> ELISA kit                                       | Meibiao Biotechnology    | Cat#MB-21294A                |
| Zebrafish CLS ELISA kit                                                    | Meibiao Biotechnology    | Cat#MB-21278A                |
| Zebrafish XOD ELISA kit                                                    | Meibiao Biotechnology    | Cat#MB-21290A                |
| Zebrafish TAZ protein ELISA kit                                            | Meibiao Biotechnology    | Cat#MB-21296A                |
| Zebrafish ACA-IgA ELISA kit                                                | Meibiao Biotechnology    | Cat#MB-21220A                |
| Zebrafish ACA-IgG ELISA kit                                                | Meibiao Biotechnology    | Cat#MB-21233A                |
| Zebrafish ACA-IgM ELISA kit                                                | Meibiao Biotechnology    | Cat#MB-21228A                |
| Zebrafish PGI <sub>2</sub> ELISA kit                                       | Meibiao Biotechnology    | Cat#MB-21260A                |
| Zebrafish TXA <sub>2</sub> ELISA kit                                       | Meibiao Biotechnology    | Cat#MB-21262A                |
| Hematoxylin and eosin (H&E) kit                                            | Yihe Biological          | Cat#517-28-2;<br>Cat#YH00606 |
| Metabolite standards                                                       |                          |                              |
| Optimization of screening method, metabolite identification and validation |                          |                              |
| 16:0 D31-18:1 Phosphatidylcholine (D-PC)                                   | Avanti Polar Lipids      | Cat#860399                   |
| 14:1-14:1 Phosphatidylcholine (PC)                                         | Avanti Polar Lipids      | Cat#330708                   |
| 16:0 D31-18:1 Phosphatidylethanolamine (D-PE)                              | Avanti Polar Lipids      | Cat#860374                   |
| 14:1-14:1 Phosphatidylethanolamine (PE)                                    | Avanti Polar Lipids      | Cat#330708                   |
| 16:0 D31-18:1 Phosphatidylserine (D-PS)                                    | Avanti Polar Lipids      | Cat#860403                   |
| 14:1-14:1 Phosphatidylserine (PS)                                          | Avanti Polar Lipids      | Cat#330708                   |
| 16:0 D31-18:1 Phosphatidylinositol (D-PI)                                  | Avanti Polar Lipids      | Cat#860042                   |
| 14:1-14:1 Phosphatidylinositol (PI)                                        | Avanti Polar Lipids      | Cat#330708                   |
| 16:0 D31-18:1 Phosphatidylglycerol (D-PG)                                  | Avanti Polar Lipids      | Cat#860384                   |

|                                                       |                            |              |
|-------------------------------------------------------|----------------------------|--------------|
| 14:1-14:1 Phosphatidylglycerol (PG)                   | Avanti Polar Lipids        | Cat#330708   |
| 18:1 Lysophosphatidylcholine (LPC)                    | Avanti Polar Lipids        | Cat#845875   |
| 14:1 Diacylglycerol (DG)                              | Avanti Polar Lipids        | Cat#330708   |
| D-erythro-sphingosine-d7 (D-Sph)                      | Avanti Polar Lipids        | Cat#860657   |
| D-erythro-Sphingosine (Sph)                           | Avanti Polar Lipids        | Cat#860490   |
| 16:0-D31 Ceramide (D-Cer)                             | Avanti Polar Lipids        | Cat#868516   |
| 18:1-18:1 Ceramide (Cer)                              | Avanti Polar Lipids        | Cat#860519   |
| 18:1-18:1 Sphingomyelin (SM)                          | Avanti Polar Lipids        | Cat#860587   |
| 16:0-D31 Sphingomyelin (D-SM)                         | Avanti Polar Lipids        | Cat#868584   |
| 18:1-17:0 Glucosylceramide (GlcCer)                   | Avanti Polar Lipids        | Cat#860569   |
| 18:1-18:1 Lactosylceramide (LacCer)                   | Avanti Polar Lipids        | Cat#860596   |
| 18:1-12:0 Sulfatide (Sul)                             | Avanti Polar Lipids        | Cat#860573   |
| Ganglioside GM3 (d40:1)                               | Avanti Polar Lipids        | Cat#860058   |
| Ganglioside GM3 (d38:1)                               | Avanti Polar Lipids        | Cat#860058   |
| Ganglioside GM3 (d39:1)                               | Avanti Polar Lipids        | Cat#860058   |
| Ganglioside GM3 (d41:1)                               | Avanti Polar Lipids        | Cat#860058   |
| Ganglioside GM3 (d42:1)                               | Avanti Polar Lipids        | Cat#860058   |
| Ganglioside GM1 (d36:1)                               | Qilu Pharmaceutical        | AN#H20046213 |
| Ganglioside GM1 (d38:1)                               | Qilu Pharmaceutical        | AN#H20046213 |
| Ganglioside GD3 (d34:1)                               | Avanti Polar Lipids        | Cat#860060   |
| Metabolite identification and validation              |                            |              |
| Cardiolipin (CL, 18:1)                                | Avanti Polar Lipids        | Cat#710335P  |
| Cardiolipin (CL, 14:0)                                | Avanti Polar Lipids        | Cat#750332P  |
| Cardiolipin (CL, 16:0)                                | Avanti Polar Lipids        | Cat#710333P  |
| Sepiapterin (Sep)                                     | Toronto Research Chemicals | Cat#S258913  |
| Isoxanthopterin (ISO)                                 | Cayman Chemical            | Cat#17564    |
| Neopterin (Neo)                                       | Cayman Chemical            | Cat#12057    |
| Folate (VB <sub>9</sub> )                             | Sigma-Aldrich              | Cat#47866    |
| Pyridoxine (VB <sub>6</sub> )                         | Sigma-Aldrich              | Cat#P5669    |
| Nicotinic acid (VB <sub>3</sub> )                     | Sigma-Aldrich              | Cat#47864    |
| Guanine                                               | Sigma-Aldrich              | Cat#PHR1243  |
| Mesaconic acid (Mesaconate)                           | Sigma-Aldrich              | Cat#131040   |
| 2-Amino-Succinic acid 4-Ethyl Ester                   | Sigma-Aldrich              | Cat#S334383  |
| L-(-)-Malic acid (Malate)                             | Sigma-Aldrich              | Cat#09172    |
| L-Threonate                                           | Toronto Research Chemicals | Cat#T404990  |
| L-Aspartate                                           | Sigma-Aldrich              | Cat#51572    |
| UDP- $\alpha$ -D-Glucose                              | Biosynth                   | Cat#15602    |
| Nicotinamide Adenine Dinucleotide (NAD <sup>+</sup> ) | Cayman Chemical            | Cat#16077    |

|                                         |                            |                  |
|-----------------------------------------|----------------------------|------------------|
| UDP-N-acetyl-D-Glucosamine (UDP-GlcNAc) | Cayman Chemical            | Cat#20353        |
| Cholate (BAs)                           | ANPEL Laboratory           | Cat#CDAA263004   |
| L-Cystathionine                         | Cayman Chemical            | Cat#16061        |
| Betaine                                 | Toronto Research Chemicals | Cat#B325005      |
| Stearidonoyl glycine                    | Cayman Chemical            | Cat#9000327      |
| L-Pyroglutamic acid (5-Oxoproline)      | Sigma-Aldrich              | Cat#83160        |
| DL-β-Leucine (β-Leucine)                | Sigma-Aldrich              | Cat#L8000        |
| L-Glutamate                             | Dr. Ehrenstorfer GmbH      | Cat#C14034400    |
| L-Tyrosine                              | Sigma-Aldrich              | Cat#91515        |
| Phenylpyruvic acid (Phenyl-pyruvate)    | Sigma-Aldrich              | Cat#74346        |
| L-Phenylalanine (Phenylalanine)         | Sigma-Aldrich              | Cat#P2126        |
| L-Glutathione Oxidized (GSSG)           | Sigma-Aldrich              | Cat#V900363      |
| L-Histidine                             | Sigma-Aldrich              | Cat#73767        |
| L-Tryptophan                            | Sigma-Aldrich              | Cat#T0254        |
| 2-Aminobenzimidazole (BAMs)             | Sigma-Aldrich              | Cat#31189        |
| 1-(2-Pyrimidyl) piperazine (BAMs)       | Sigma-Aldrich              | Cat#421235       |
| 2,4-Dimethylbenzaldehyde                | Sigma-Aldrich              | Cat#8.21461.0010 |
| β-Carotene                              | Sigma-Aldrich              | Cat#PHR1239      |
| Adenosine 5'-Monophosphate (AMP)        | Toronto Research Chemicals | Cat#A281780      |
| Inosine-5'-Monophosphate (IMP)          | Toronto Research Chemicals | Cat#I665005      |
| Adenosine 5'-Diphosphate (ADP)          | Cayman Chemical            | Cat#16778        |
| Adenosine 5'-Triphosphate (ATP)         | Sigma-Aldrich              | Cat#A1852        |
| 18:1 Lysophosphatidylinositol (LPI)     | Avanti Polar Lipids        | Cat#850100P      |
| Octadecyl Amine                         | Sigma-Aldrich              | Cat#74750        |
| Nonanoic acid                           | Larodan                    | Cat#10-0900-9    |
| Homogamma-Linolenic acid (Diho-γ-Lin)   | Larodan                    | Cat#10-2013-7    |
| Gamma-Linolenic acid (γ-Lin)            | Larodan                    | Cat#10-1830-9    |
| Linoleate (Lin)                         | Larodan                    | Cat#10-1802-13   |
| α-linoleate (α-Lin)                     | Yuanze Bio-Technology      | Cat#B21967       |
| Eicosapentaenoic acid (EPA)             | Larodan                    | Cat#10-2005-7    |
| Arachidonate (Ara)                      | Larodan                    | Cat#10-2004-7    |
| <hr/> Rescue experiments <hr/>          |                            |                  |
| Linoleate (Lin)                         | Larodan                    | Cat#10-1802-13   |
| Arachidonate (Ara)                      | Larodan                    | Cat#10-2004-7    |
| α-linoleate (α-Lin)                     | Yuanze Bio-Technology      | Cat#B21967       |
| Isoxanthopterin (ISO)                   | Cayman Chemical            | Cat#17564        |

|                                                          |                            |                                                                                                                                                                                   |
|----------------------------------------------------------|----------------------------|-----------------------------------------------------------------------------------------------------------------------------------------------------------------------------------|
| Isotope tracing                                          |                            |                                                                                                                                                                                   |
| Linoleate (Lin)                                          | Larodan                    | Cat#10-1802-13                                                                                                                                                                    |
| <sup>13</sup> C-labeled linoleate ( <sup>13</sup> C-Lin) | Toronto Research Chemicals | Cat#L467500                                                                                                                                                                       |
| Software                                                 |                            |                                                                                                                                                                                   |
| Progenesis QI 2.3                                        | Waters                     | <a href="http://www.nonlinear.com/progenesis/qi/">http://www.nonlinear.com/progenesis/qi/</a>                                                                                     |
| Compound Discoverer 2.1                                  | Thermo Fisher              | <a href="https://planetorbitrap.com/compound-discoverer">https://planetorbitrap.com/compound-discoverer</a>                                                                       |
| Gephi 0.9.2                                              | Gephi                      | <a href="https://gephi.org/">https://gephi.org/</a>                                                                                                                               |
| NIS-Elements D3.10                                       | Nikon                      | <a href="https://www.nikon.com/products/microscope-solutions/lineup/img_soft/nis-elements/">https://www.nikon.com/products/microscope-solutions/lineup/img_soft/nis-elements/</a> |
| SPSS                                                     | IBM                        | <a href="https://www.ibm.com/analytics/spss-statistics-software">https://www.ibm.com/analytics/spss-statistics-software</a>                                                       |

301 **Table S2.** The major affected metabolic processes, including major metabolites with statistically different levels compared with those of the  
302 control group and the corresponding exposure chemicals. All listed endogenous metabolites were identified and validated with referenced  
303 standards.

| Region | Metabolic process                    | Affected metabolites                                                                                                                                                                              | Effective chemicals                                         | Effects  |
|--------|--------------------------------------|---------------------------------------------------------------------------------------------------------------------------------------------------------------------------------------------------|-------------------------------------------------------------|----------|
| I      | Cardiolipin biosynthesis             | Cardiolipin                                                                                                                                                                                       | p,p'-DDE, TPHP, PFOS, TCS                                   | Increase |
|        | Lysophospholipid metabolism          | LPC, LPE                                                                                                                                                                                          | p,p'-DDE, TPHP, PFOS, TCS                                   | Decrease |
|        | Metabolism of cofactors and vitamins | Isoxanthopterin; Vitamin B <sub>6</sub> analogue, Vitamin B <sub>3</sub> analogue                                                                                                                 | TCS                                                         | Decrease |
|        | Glycerophospholipid metabolism       | PE, PS                                                                                                                                                                                            | p,p'-DDE, TPHP, PFOS, TCS                                   | Decrease |
|        |                                      | PC, PE, PS, PI                                                                                                                                                                                    | p,p'-DDE, TPHP, PCB153, TPT                                 | Increase |
|        | Bile acid biosynthesis               | 5 $\beta$ -Cyprin sulfate, 5 $\beta$ -Cyprin sulfate-OH, Cholestane-pentol                                                                                                                        | p,p'-DDE, TPHP, PCB153, TPT, BPA, 6OHBDE47, TCS, PFOS, PFOA | Decrease |
|        | Fatty acid biosynthesis              | Linoleate, $\gamma$ -Linoleate, Dihomo- $\gamma$ -Linoleate, Arachidonate, Adrenic acid, Eicosanoic acid, 11,12-EET, $\alpha$ -Linoleate, EPA, DPA, $\alpha$ -Eleostearic acid, Hexadecenoic acid | p,p'-DDE, TPHP, PFOS, TCS, BPA, PCB153, TPT                 | Decrease |
| II     | Amino acids metabolism               | L-Cystathione, Betaine, N-Methylglycine, Stearidonoyl glycine, Phenyl-alanine, Phenyl-pyruvate, 5-Oxoproline, GSSG, L-Glutamine, L-Histidine                                                      | p,p'-DDE, TPHP, PFOS, 6OHBDE47, PCB153, TPT                 | Decrease |
|        | Nucleotide metabolism                | Hypoxanthine, Guanine, Purines                                                                                                                                                                    | p,p'-DDE, TPHP, PFOS, 6OHBDE47, PCB153, TPT                 | Decrease |
|        |                                      | Pyrimidines                                                                                                                                                                                       | TCS, DEHP                                                   | Decrease |
|        | Acylamide biosynthesis               | Peptides                                                                                                                                                                                          | PFOS, p,p'-DDE, TPHP                                        | Increase |
|        | Secondary metabolites biosynthesis   | O-Heterocyclic compounds, N-Heterocyclic compounds                                                                                                                                                | p,p'-DDE, PFOS, PFOA, TCS, BPA, B(a)P, DEHP                 | Increase |

304  
305

306 **Table S3.** Optimized instrumental and MRM conditions of the target chemicals.

| Analyte                      | MRM transition  | Cone voltage<br>(kV) | Collision<br>energy (eV) |
|------------------------------|-----------------|----------------------|--------------------------|
| BPA                          | 227.10 > 211.95 | 38.0                 | 18.0                     |
|                              | 227.10 > 132.90 | 38.0                 | 28.0                     |
| 6OHBDE47                     | 500.63 > 78.46  | 16.0                 | 14.0                     |
|                              | 500.63 > 81.32  | 16.0                 | 22.0                     |
| TCS                          | 286.85 > 34.99  | 18.0                 | 4.0                      |
|                              | 286.85 > 141.95 | 18.0                 | 28.0                     |
|                              | 288.85 > 34.99  | 18.0                 | 4.0                      |
| <sup>13</sup> C-BPA          | 229.13 > 212.92 | 38.0                 | 18.0                     |
|                              | 229.13 > 134.96 | 38.0                 | 28.0                     |
| PFOS                         | 498.83 > 98.74  | 5.0                  | 44.0                     |
|                              | 498.83 > 129.76 | 5.0                  | 44.0                     |
|                              | 498.83 > 79.82  | 5.0                  | 56.0                     |
| <sup>13</sup> C-PFOS         | 502.94 > 98.96  | 5.0                  | 44.0                     |
|                              | 502.94 > 79.82  | 5.0                  | 56.0                     |
| PFOA                         | 412.88 > 368.79 | 4.0                  | 10.0                     |
|                              | 412.88 > 218.80 | 4.0                  | 16.0                     |
|                              | 412.88 > 168.82 | 4.0                  | 18.0                     |
| <sup>13</sup> C-PFOA         | 416.90 > 221.99 | 4.0                  | 16.0                     |
|                              | 416.90 > 168.95 | 4.0                  | 18.0                     |
| DEHP                         | 391.06 > 70.98  | 18.0                 | 8.0                      |
|                              | 391.06 > 166.87 | 18.0                 | 12.0                     |
| DEHP- <i>d</i> <sub>4</sub>  | 395.23 > 171.04 | 12.0                 | 12.0                     |
|                              | 395.23 > 152.97 | 12.0                 | 36.0                     |
| TPHP                         | 326.97 > 214.92 | 42.0                 | 24.0                     |
|                              | 326.97 > 76.90  | 42.0                 | 46.0                     |
|                              | 326.97 > 151.87 | 42.0                 | 46.0                     |
| TPT                          | 428.86 > 350.85 | 40.0                 | 18.0                     |
|                              | 350.90 > 196.79 | 72.0                 | 24.0                     |
|                              | 350.90 > 119.75 | 72.0                 | 28.0                     |
| TPHP- <i>d</i> <sub>15</sub> | 342.04 > 81.98  | 18.0                 | 42.0                     |

307  
308  
309

310 **Table S4.** List of materials and calibration standards in the kits.

| Reagents                             | Amount needed for 96 samples                                    |
|--------------------------------------|-----------------------------------------------------------------|
| Standards (for Different Indicators) | 0.3 mL x 6 tubes                                                |
| Sample Diluent                       | 6.0 mL                                                          |
| HRP-Conjugate Reagent                | 10.0 mL                                                         |
| 20X Wash Solution                    | 25.0 mL                                                         |
| Chromogen Solution A                 | 6.0 mL                                                          |
| Chromogen Solution B                 | 6.0 mL                                                          |
| Stop Solution                        | 6.0 mL                                                          |
| ELISA Kit for Zebrafish              | Standard concentration (from S <sub>0</sub> to S <sub>5</sub> ) |
| LPLAT                                | 0, 50, 100, 200, 400, 800 U/L                                   |
| LCLAT                                | 0, 30, 60, 120, 240, 480 U/L                                    |
| PLA <sub>2</sub>                     | 0, 3, 6, 12, 24, 48 U/L                                         |
| CLS                                  | 0, 25, 50, 100, 200, 400 U/L                                    |
| XOD                                  | 0, 0.25, 0.5, 1, 2, 4 U/L                                       |
| TAZ                                  | 0, 2.5, 5, 10, 20, 40 ng/mL                                     |
| ACA-IgA                              | 0, 3, 6, 12, 24, 48 APL U/mL                                    |
| ACA-IgG                              | 0, 3, 6, 12, 24, 48 GPL U/mL                                    |
| ACA-IgM                              | 0, 3, 6, 12, 24, 48 MPL U/mL                                    |
| PGI <sub>2</sub>                     | 0, 10, 20, 40, 80, 160 pg/mL                                    |
| TXA <sub>2</sub>                     | 0, 15, 30, 60, 120, 240 pg/mL                                   |

311  
312  
313  
314

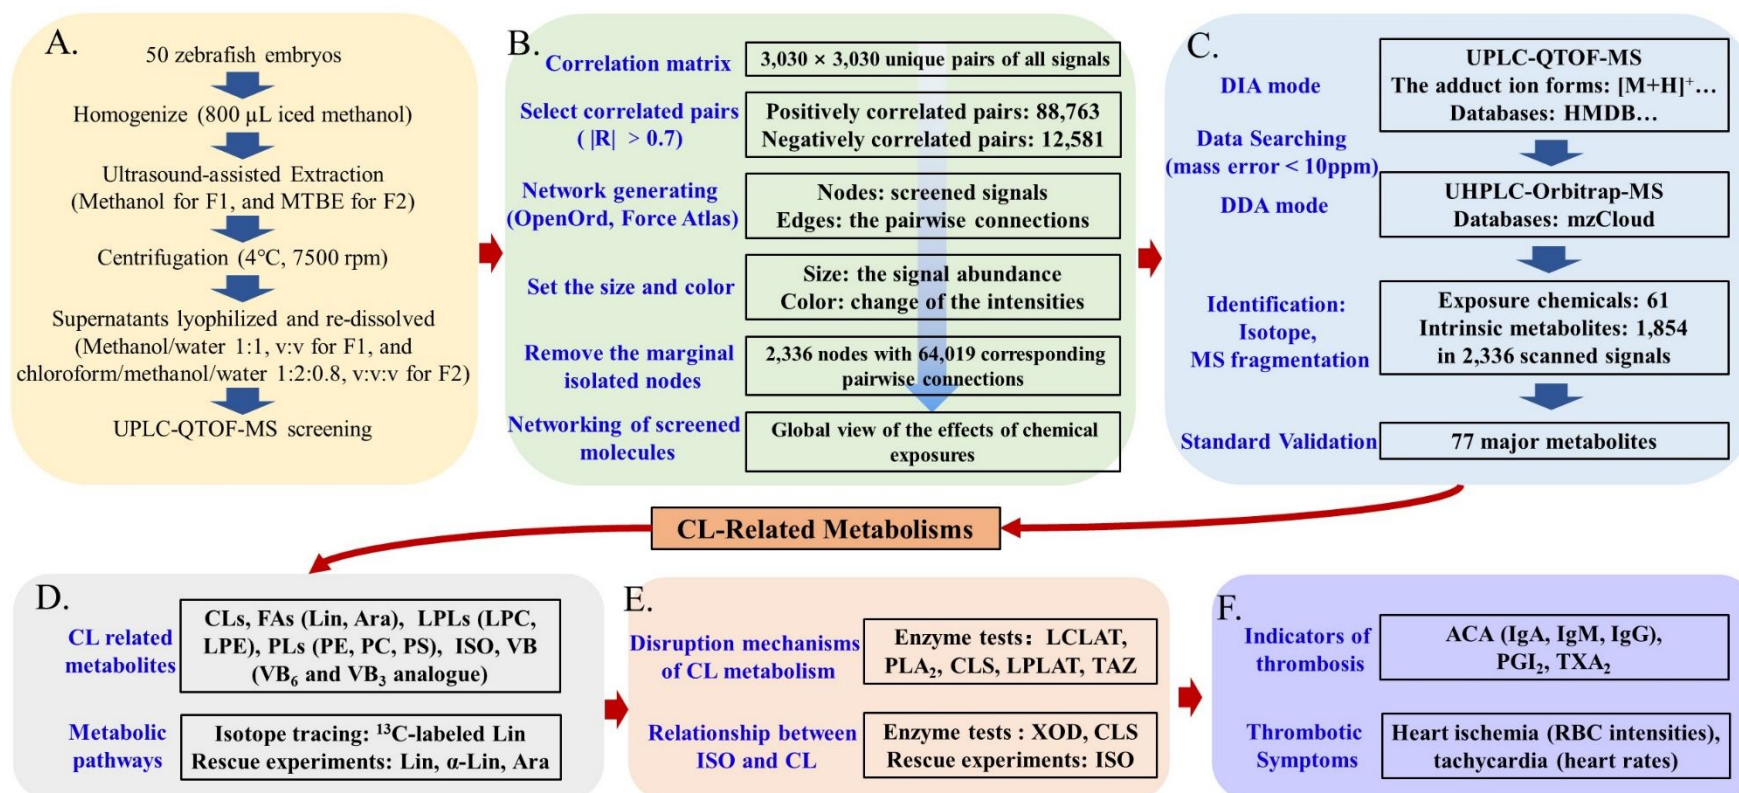

**Figure S1.** A workflow diagram of this study.



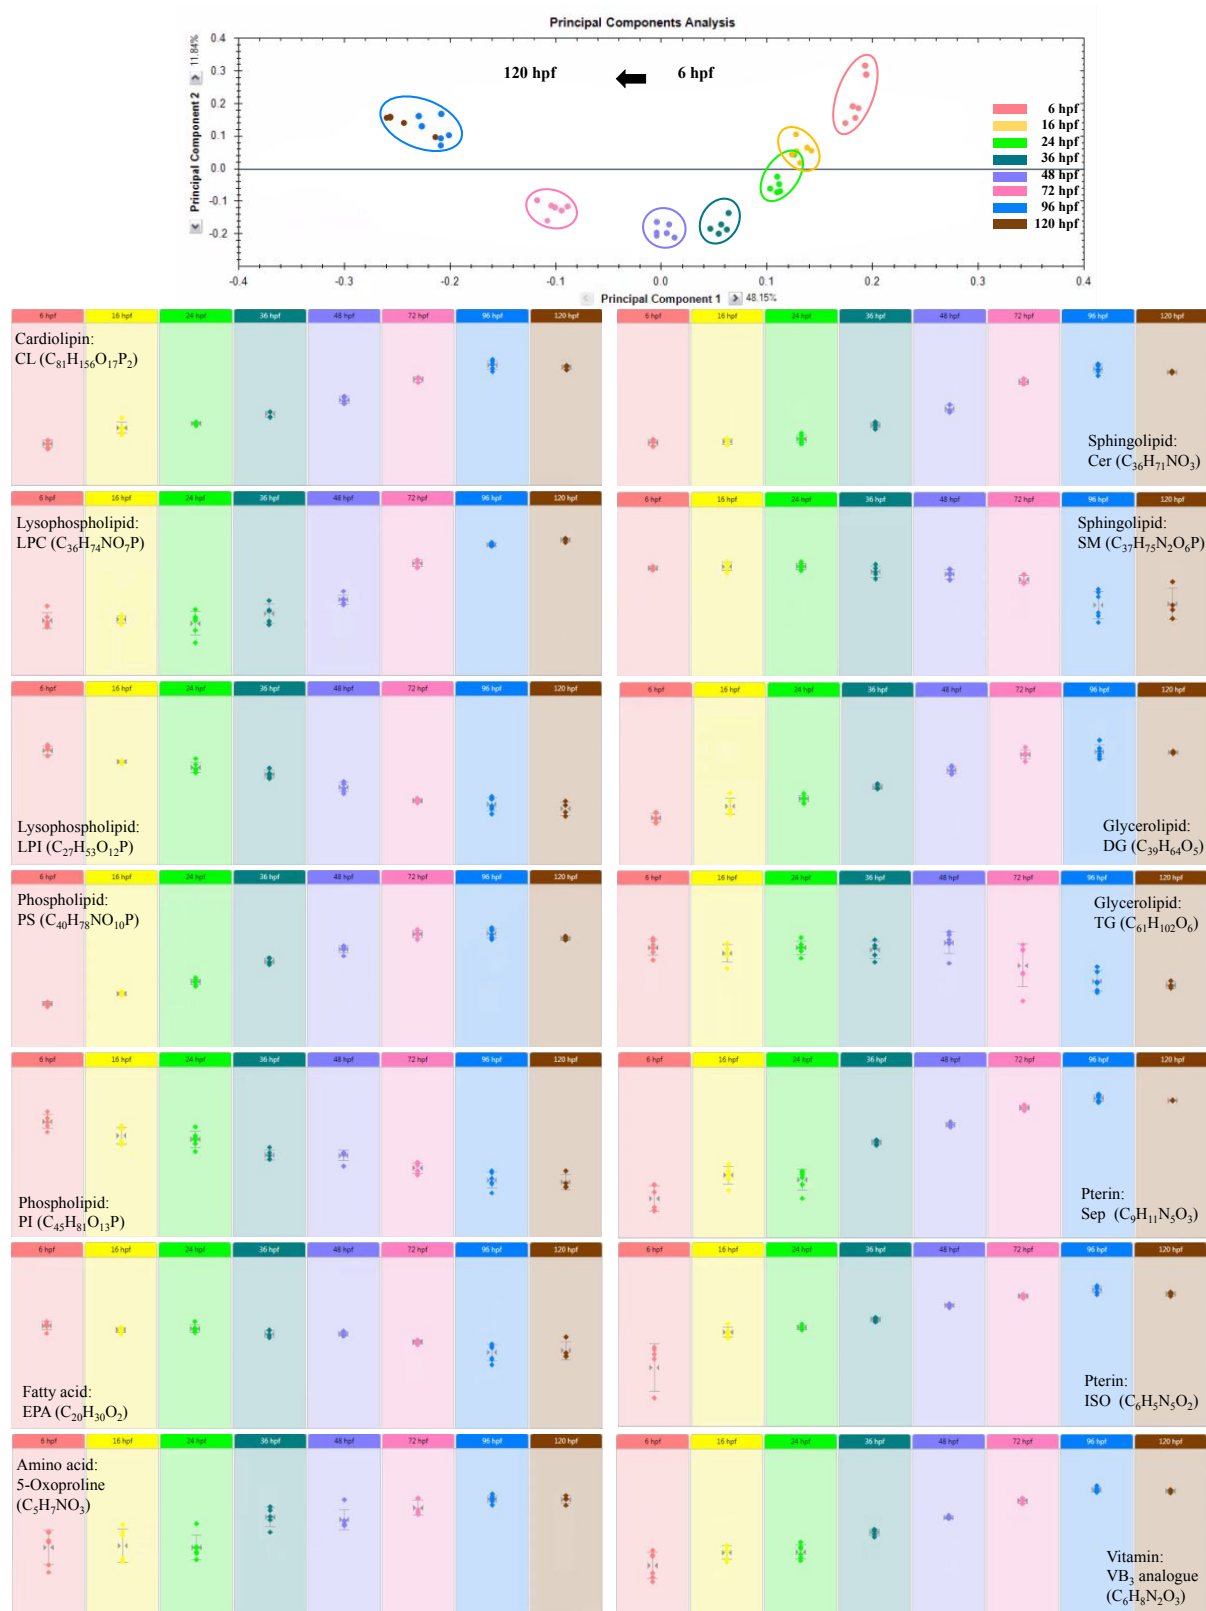

**Figure S2.** PCA analysis of screened metabolites during the developing stages of zebrafish embryos (6 to 120 h post fertilization), and concentration changes of representative molecules of the screened metabolites.

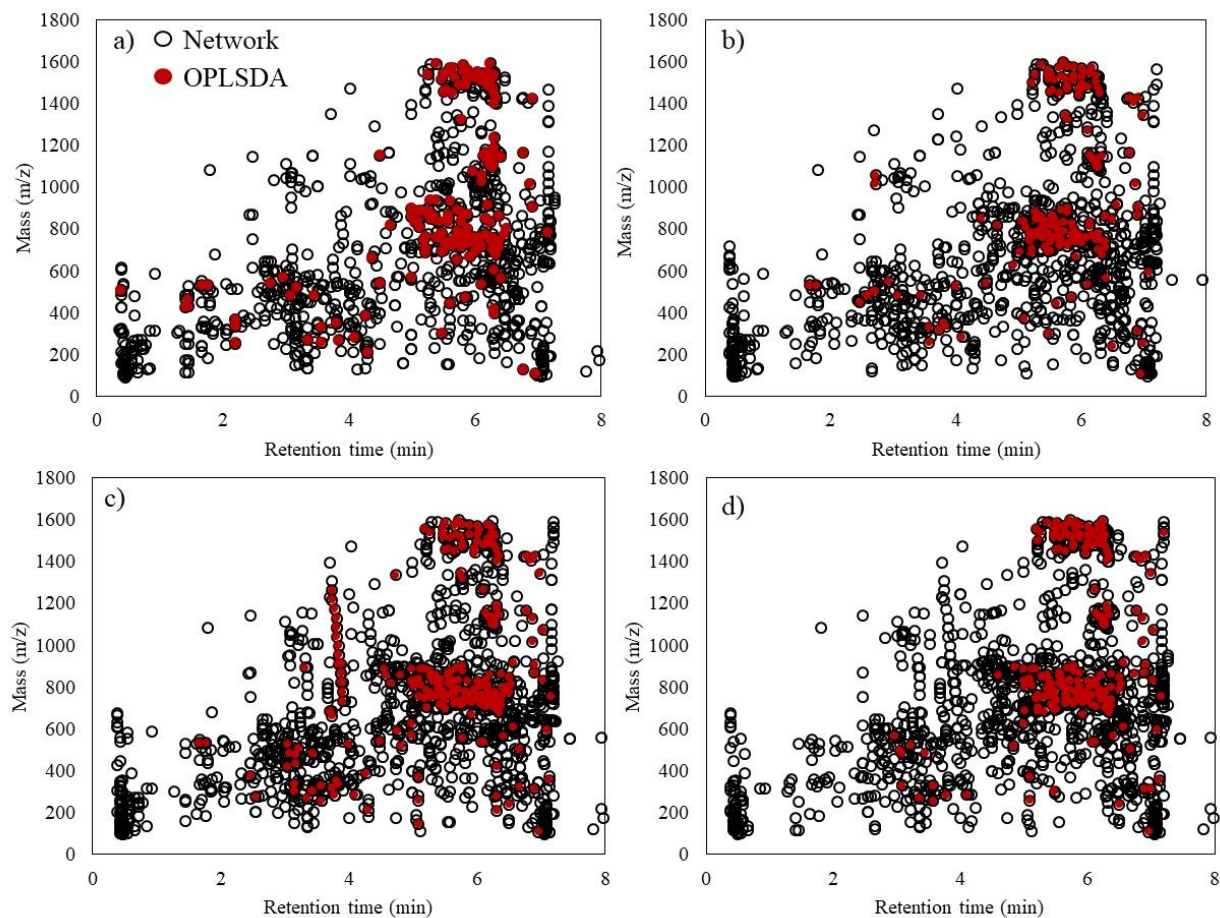

**Figure S3.** Selected molecules obtained by network analysis and OPLSDA exemplified by zebrafish embryos exposed to TCS (a), PFOS (b), pp'-DDE (c), and TPHP (d).

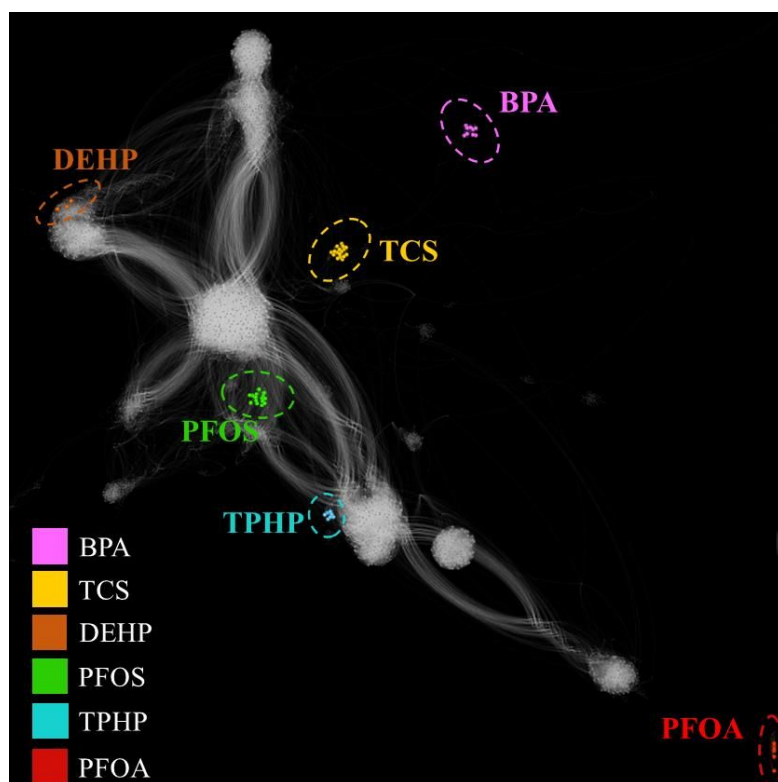

**Figure S4.** Distributions of exposure chemicals and their metabolites detected in the auto-generated network.

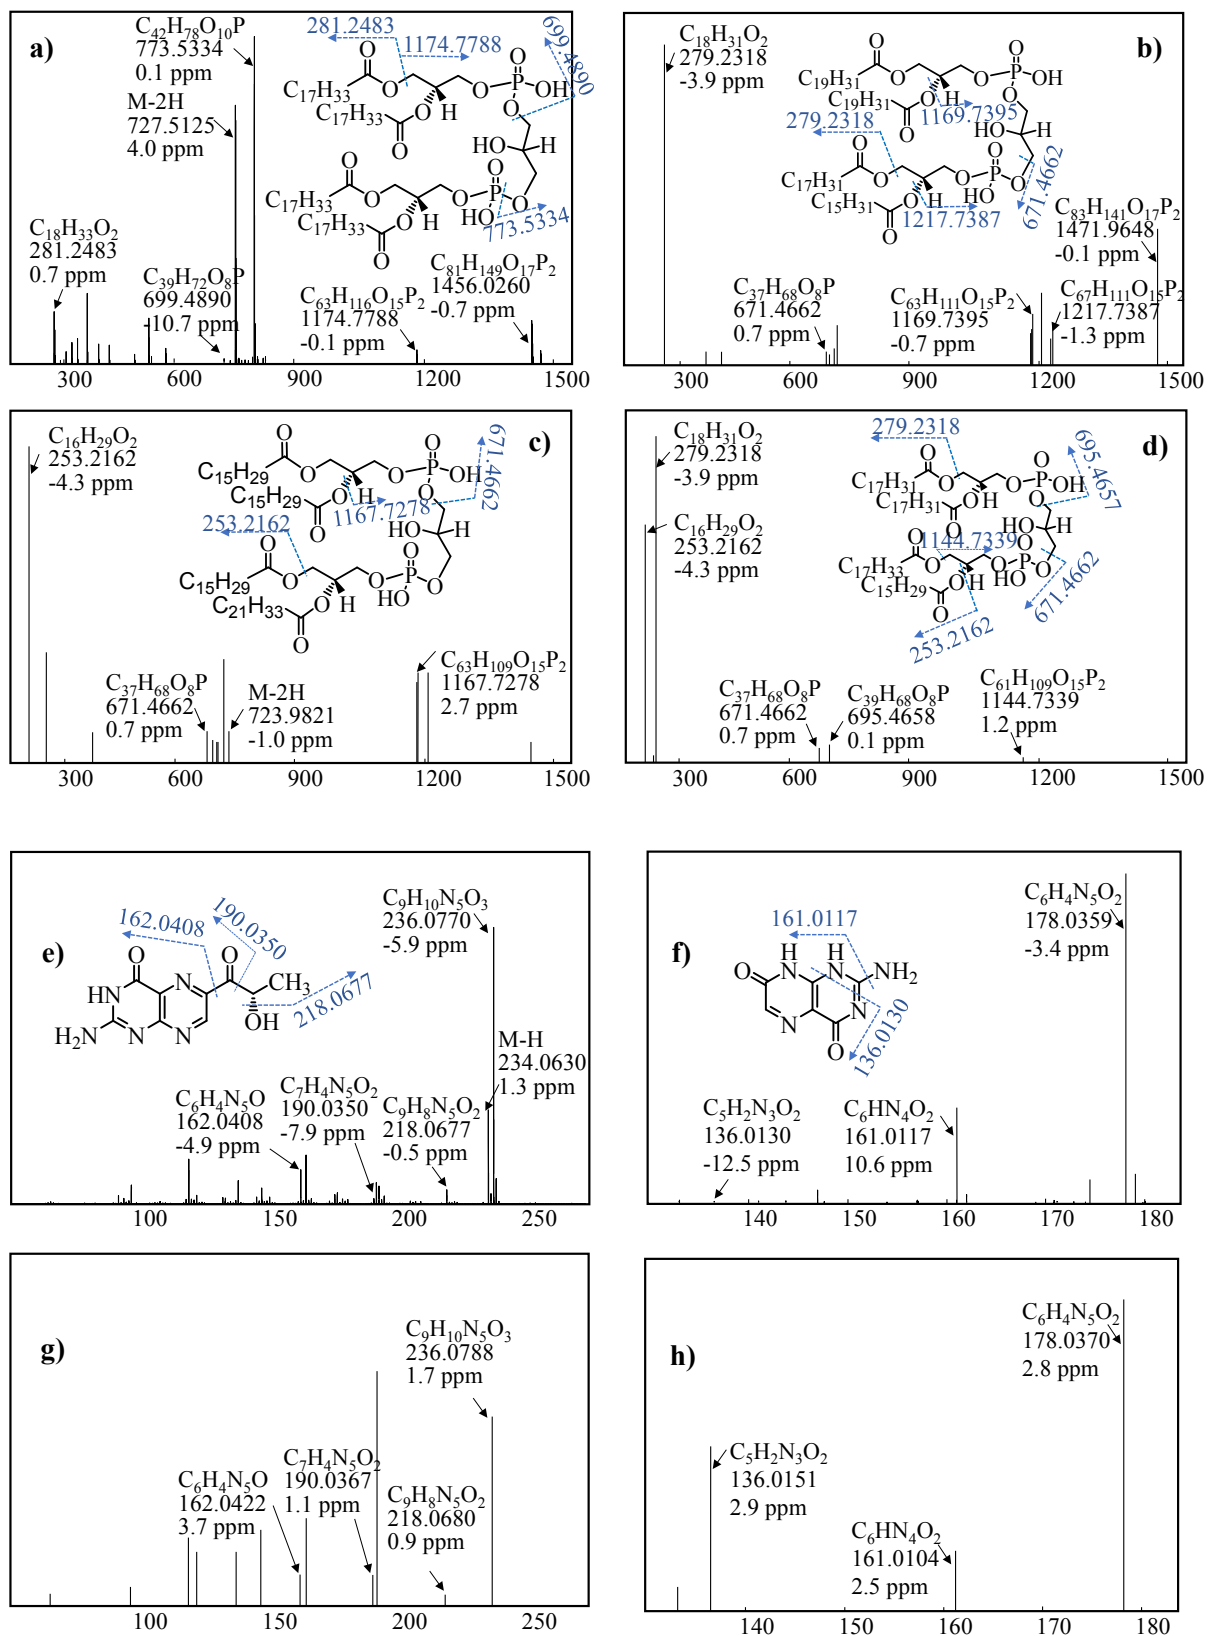

**Figure S5.** Mass spectra of standards of CL (a:  $C_{81}H_{149}O_{17}P_2$ ), Sep (e), and ISO (f). Mass spectra of CLs (b:  $C_{83}H_{142}O_{17}P_2$ , c:  $C_{79}H_{138}O_{17}P_2$ , d:  $C_{79}H_{142}O_{17}P_2$ ), Sep (g), and ISO (h) detected in zebrafish embryo.

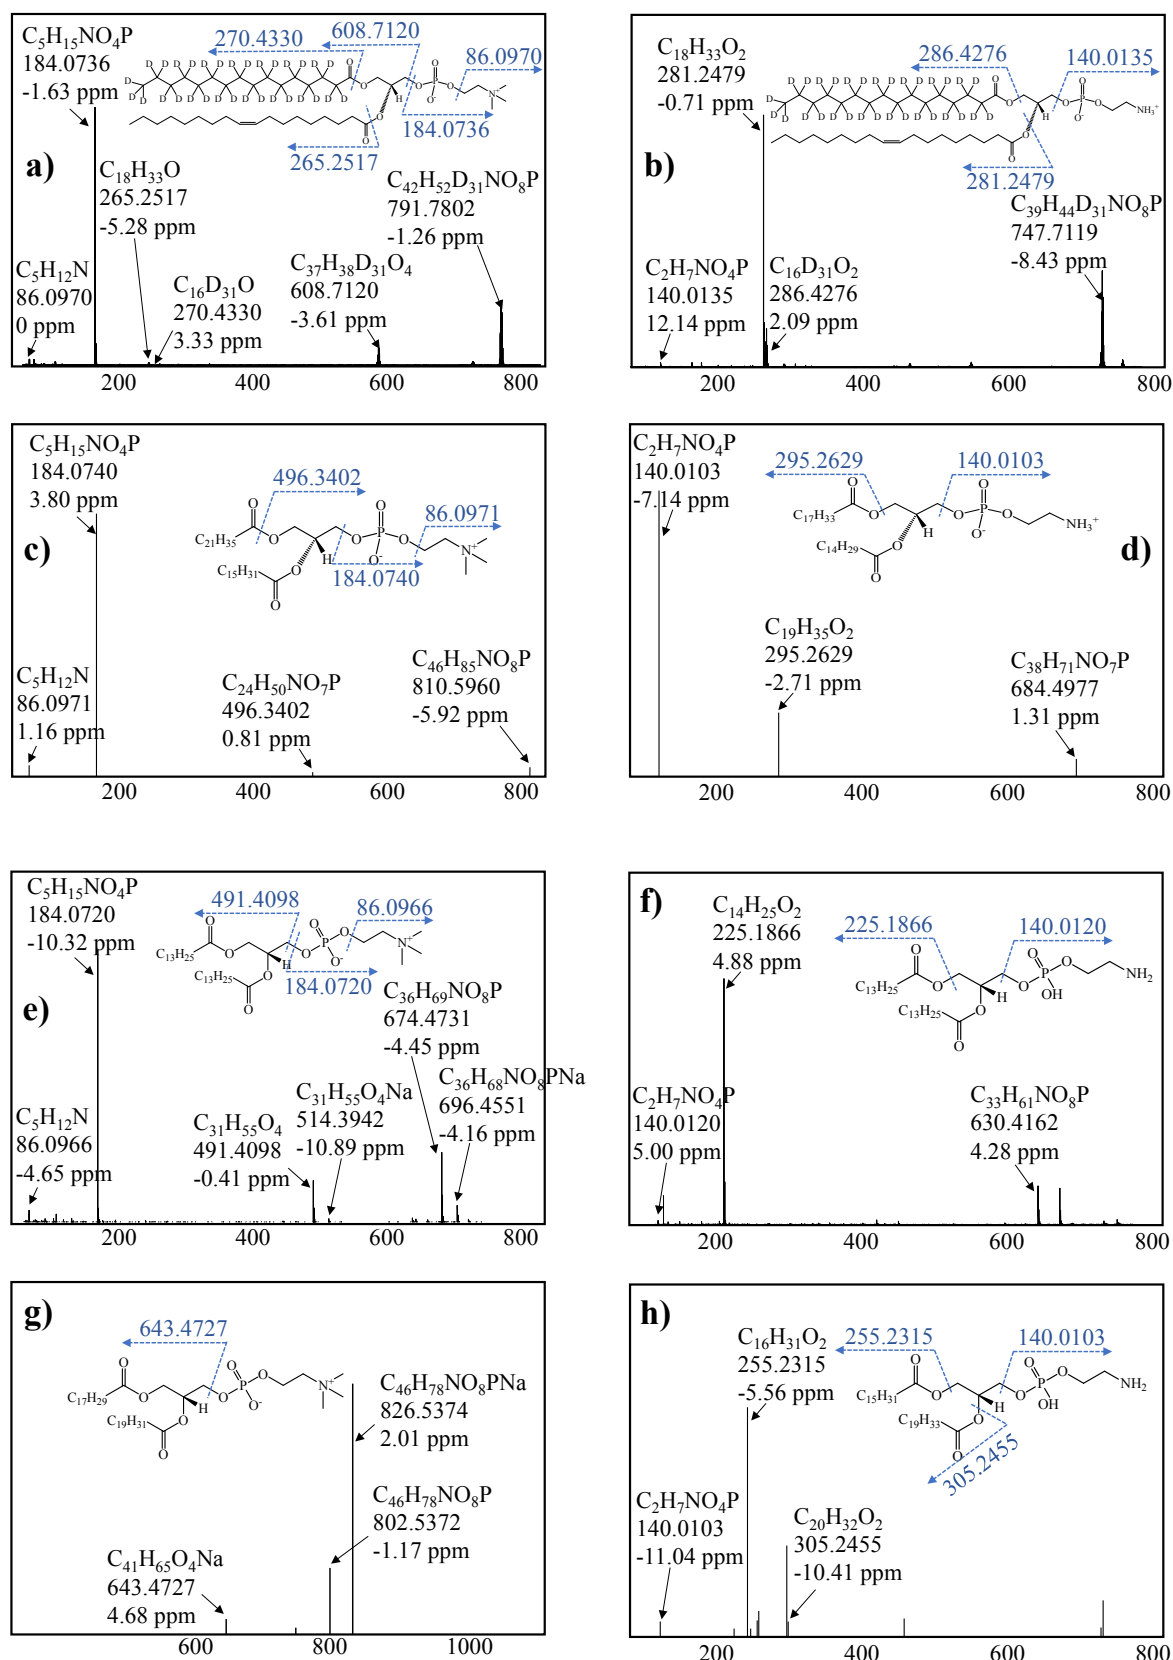

**Figure S6.** Mass spectra of standards of D-PC (a), D-PE (b), PC (c), and PE (f). Mass spectra of PC (c:  $C_{46}H_{84}NO_8P$ , g:  $C_{46}H_{78}NO_8P$ ) and PE (d:  $C_{38}H_{74}NO_8P$ , h:  $C_{41}H_{76}NO_8P$ ) detected in zebrafish embryo.

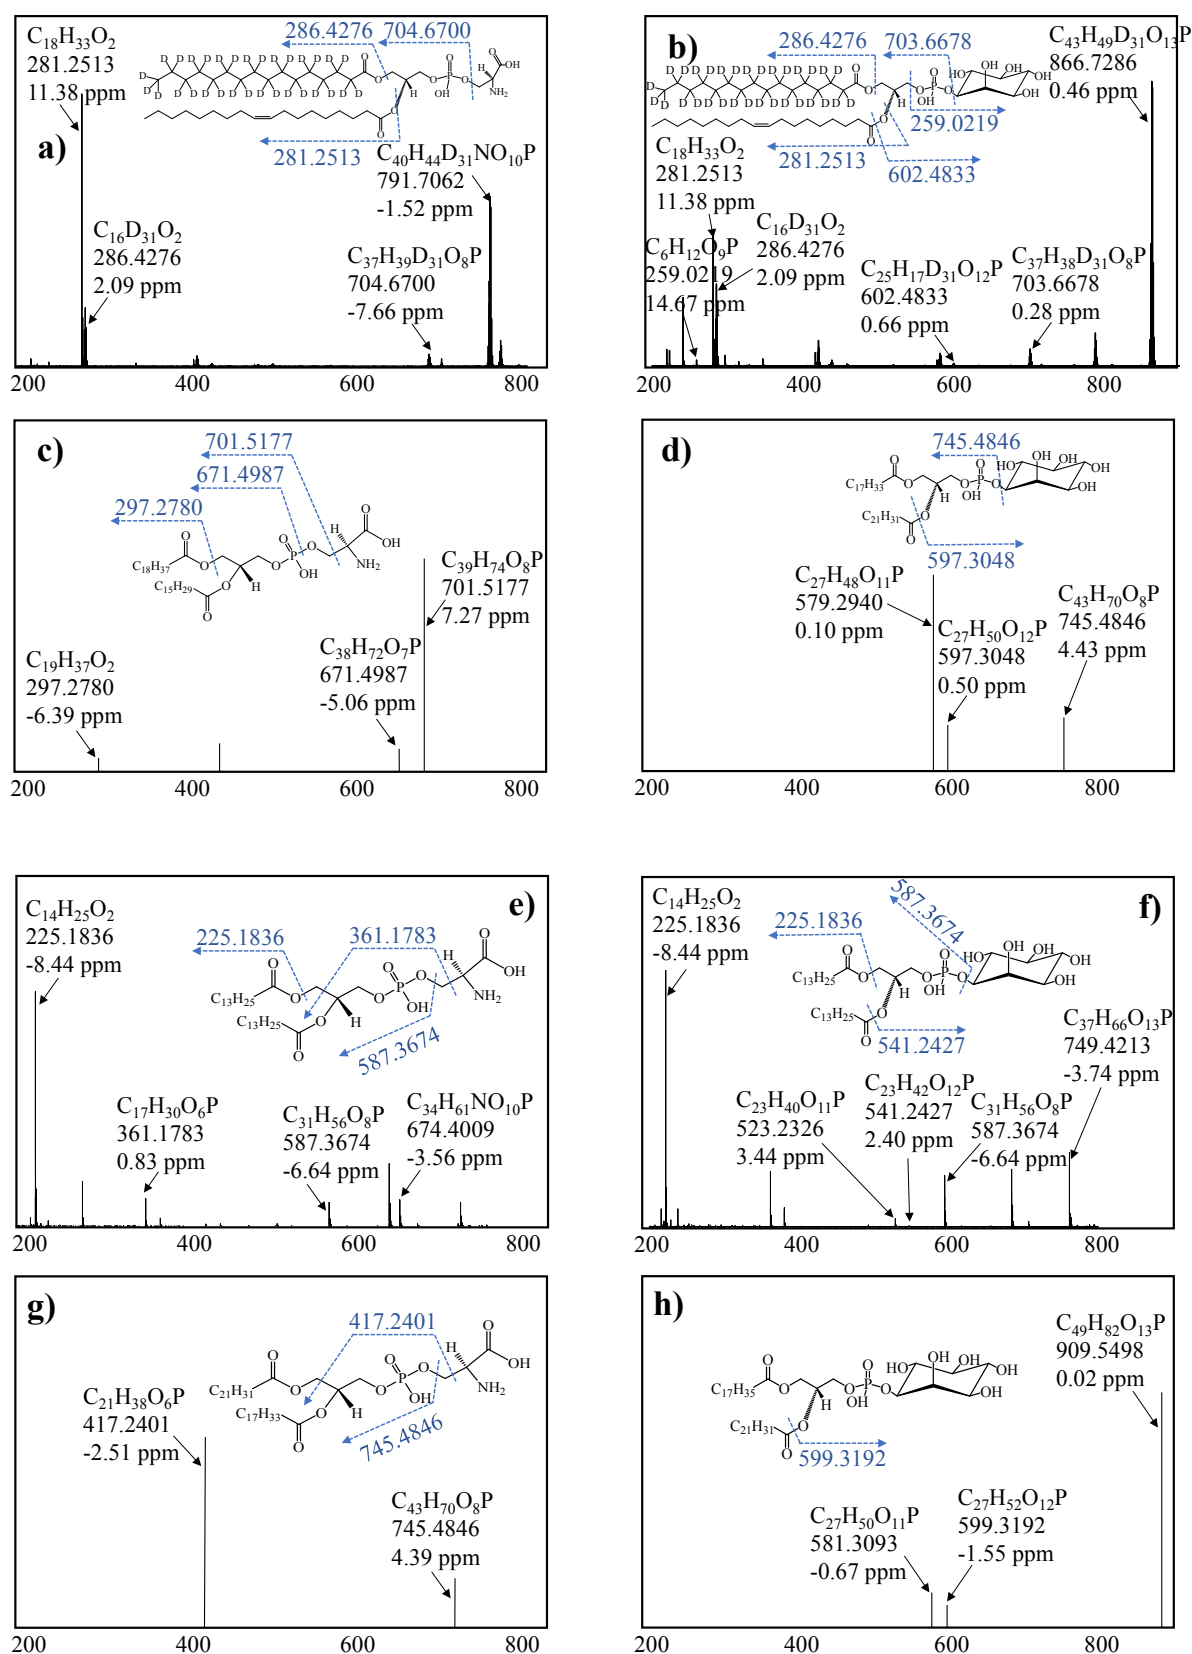

**Figure S7.** Mass spectra of standards of D-PS (a), D-PI (b), PS (e), and PI (f). Mass spectra of PS (c:  $C_{41}H_{78}NO_{10}P$ , g:  $C_{46}H_{76}NO_{10}P$ ) and PI (d:  $C_{49}H_{81}O_{13}P$ , h:  $C_{49}H_{83}O_{13}P$ ) detected in zebrafish embryo.

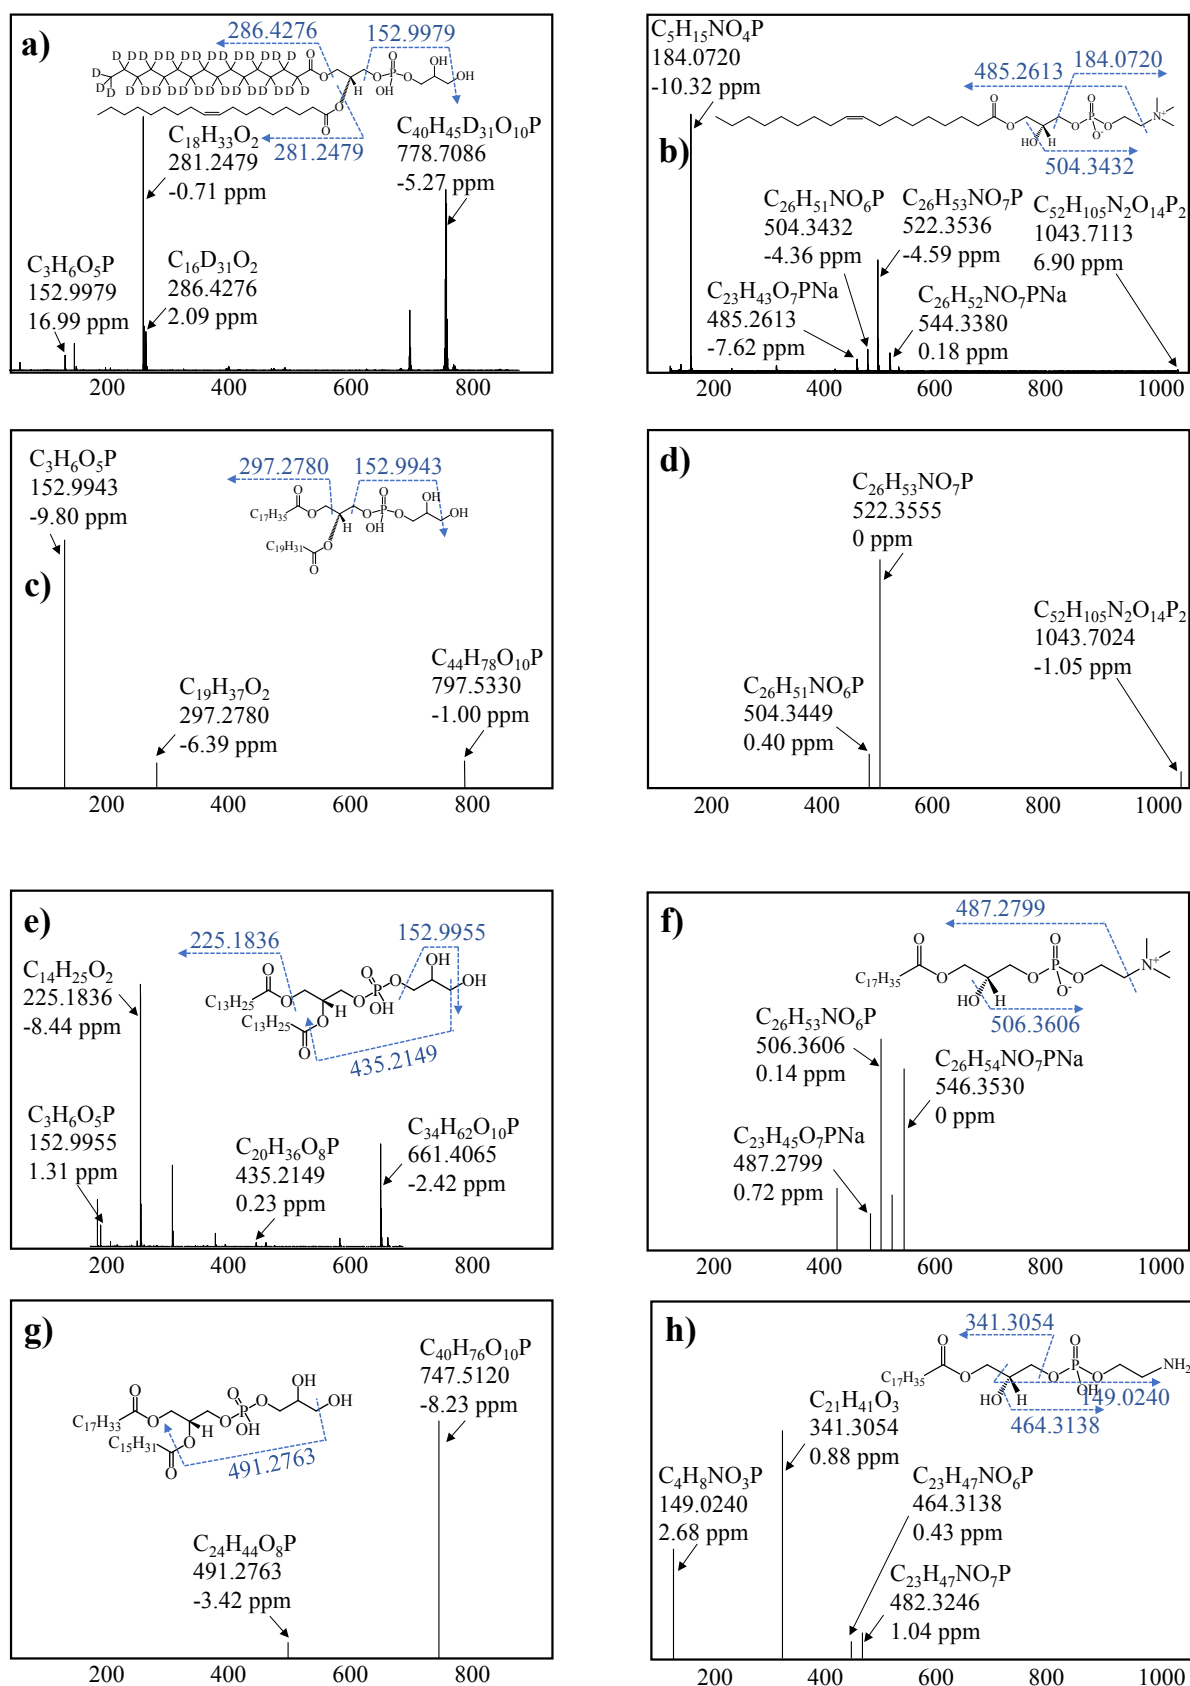

**Figure S8.** Mass spectra of standards of D-PG (a), LPC (b), and PG (e). Mass spectra of PG (c:  $C_{44}H_{79}O_{10}P$ , g:  $C_{40}H_{77}O_{10}P$ ), LPC (d:  $C_{26}H_{52}NO_7P$ , f:  $C_{26}H_{54}NO_7P$ ) and LPE (h:  $C_{23}H_{48}NO_7P$ ) detected in zebrafish embryo.



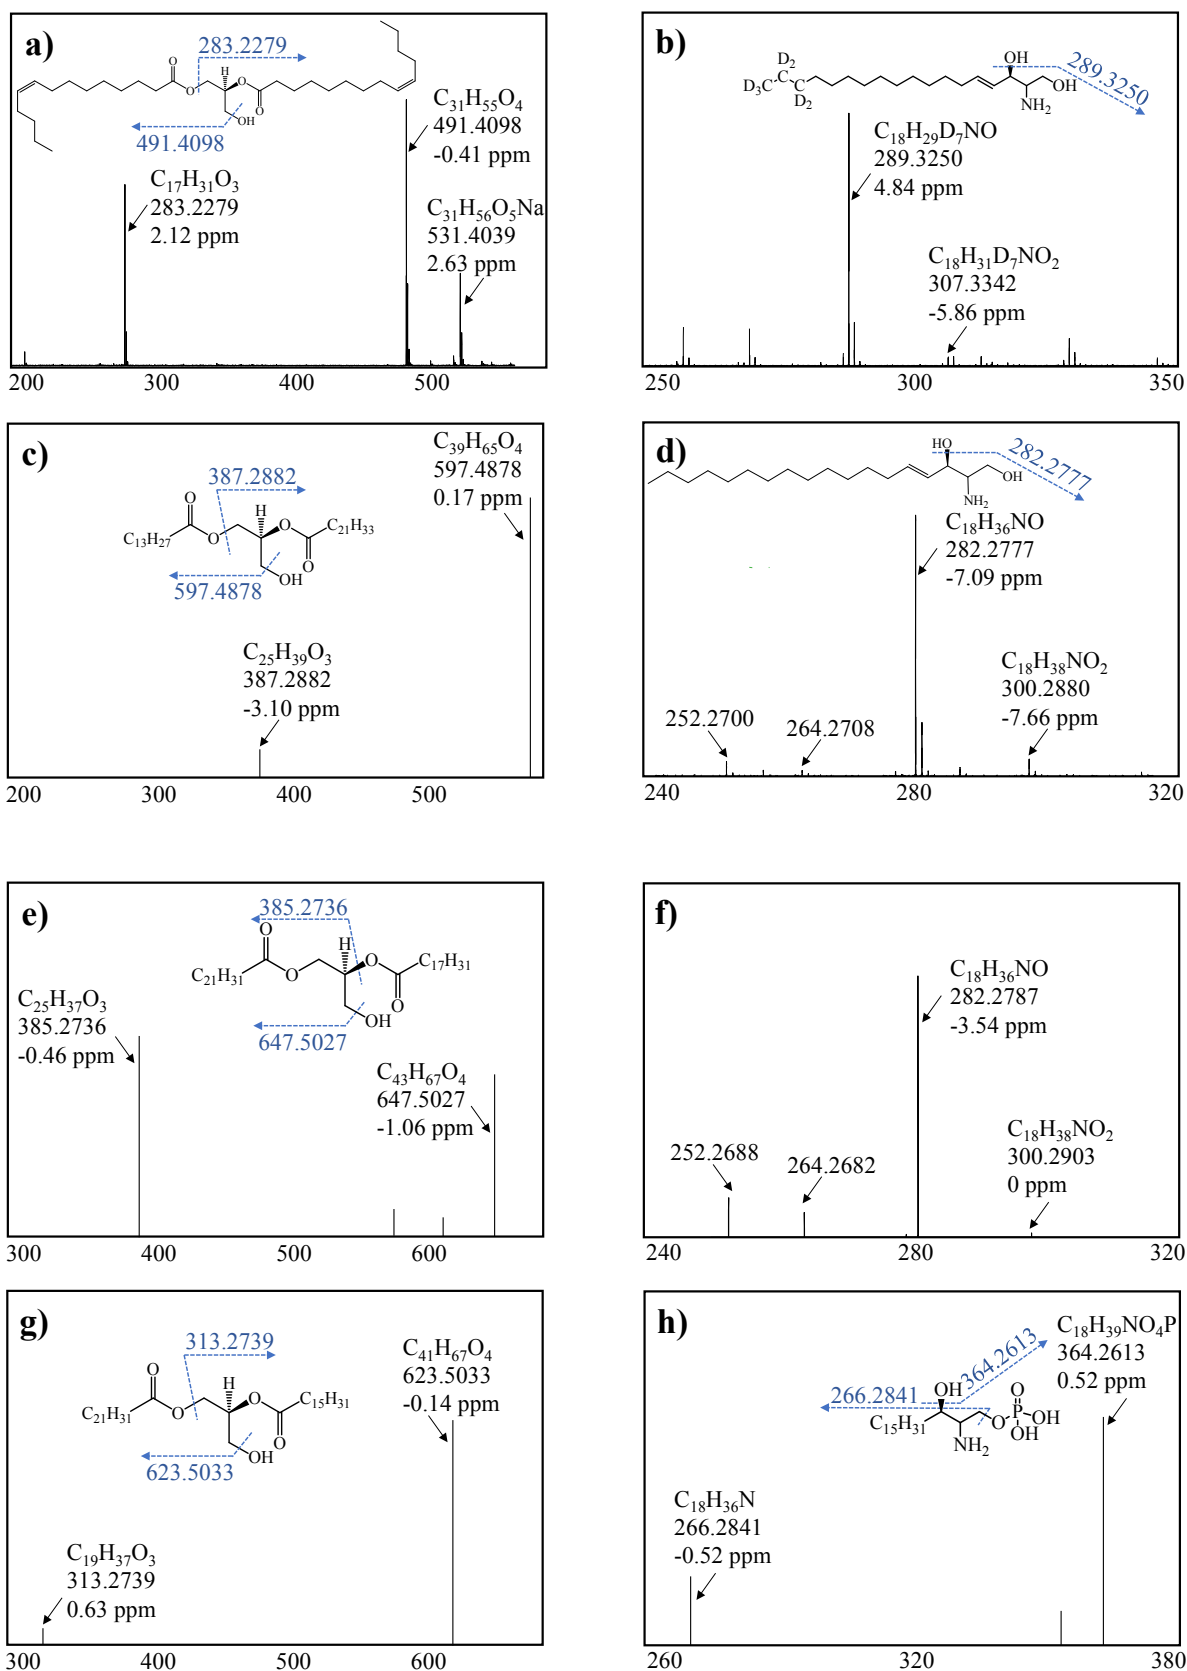

**Figure S9.** Mass spectra of standards of DG (a), D-Sph (b), and Sph (d). Mass spectra of DG (c:  $C_{39}H_{66}O_5$ , e:  $C_{43}H_{68}O_5$ , g:  $C_{41}H_{68}O_5$ ), Sph (f:  $C_{18}H_{37}NO_2$ ) and dhS-1-P (h:  $C_{18}H_{40}NO_5P$ ) detected in zebrafish embryo.



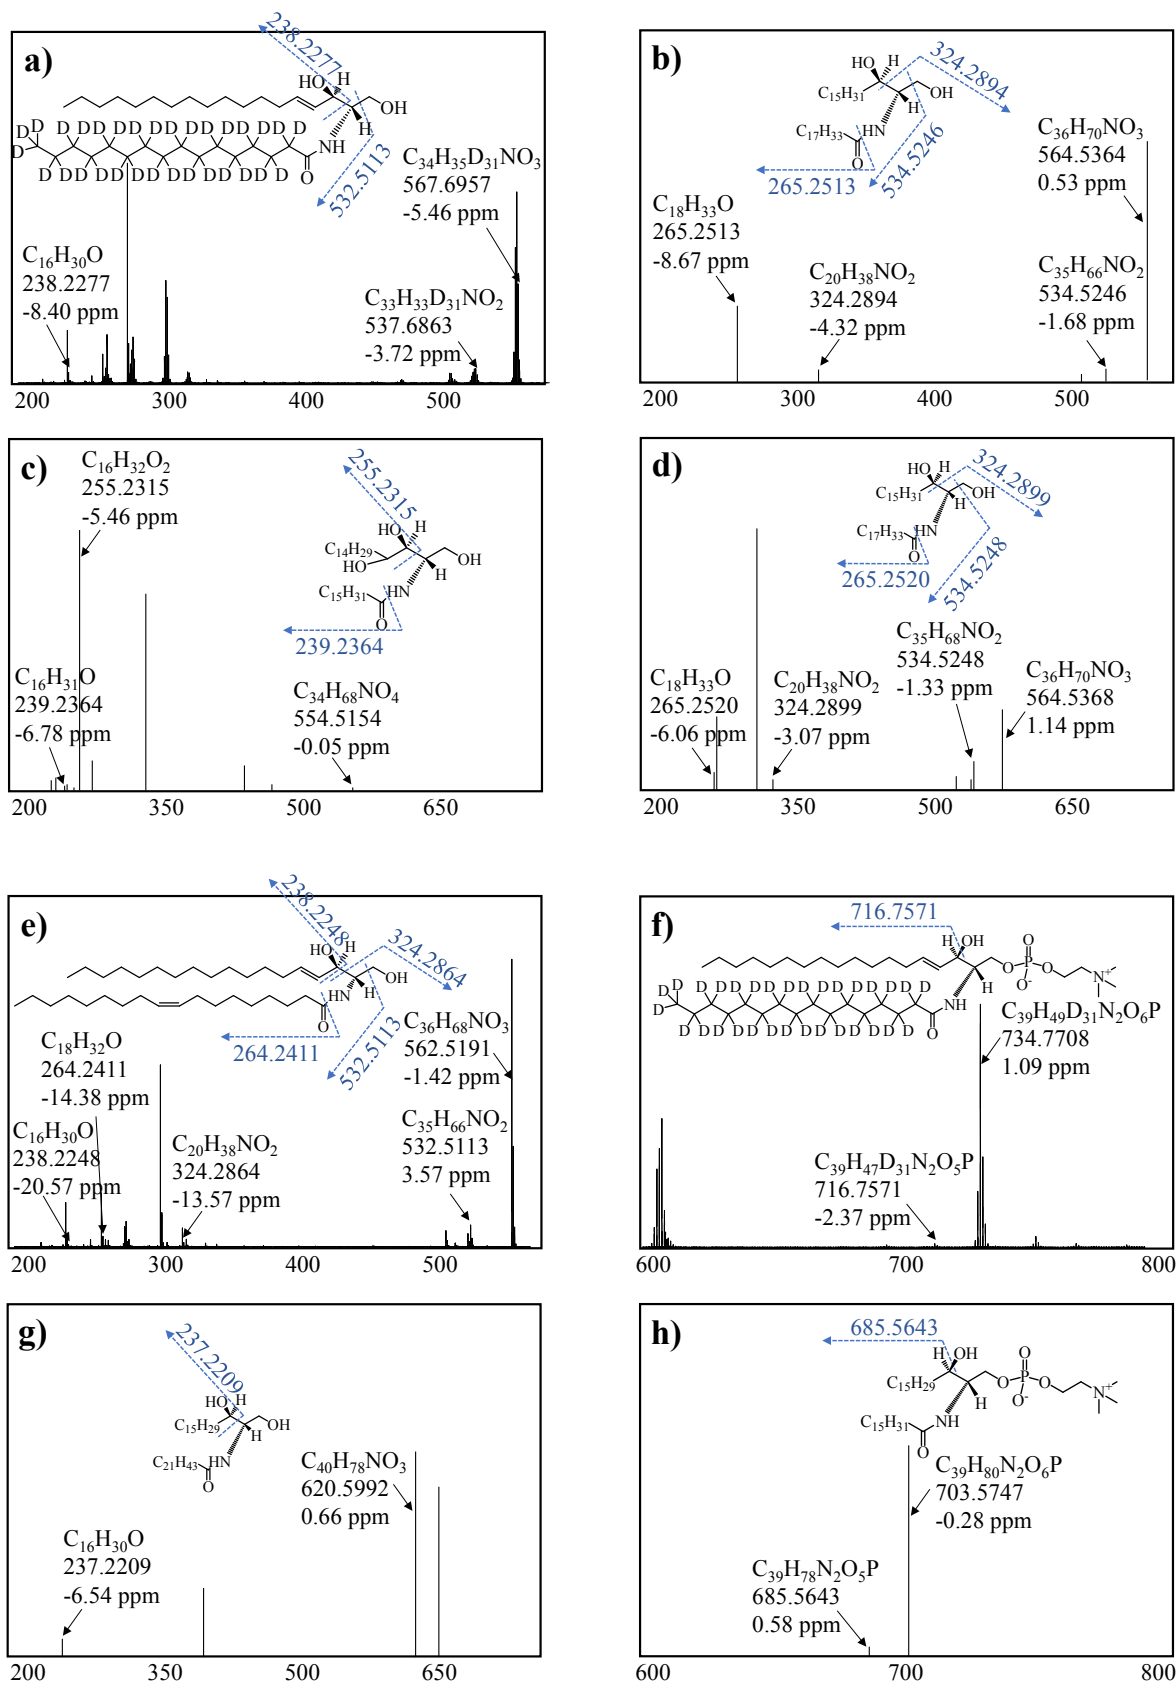

**Figure S10.** Mass spectra of standards of D-Cer (a), Cer (e), and D-SM (f). Mass spectra of dhCer (b:  $C_{36}H_{71}NO_3$ , d:  $C_{36}H_{71}NO_3$ ), OH-Cer (c:  $C_{34}H_{69}NO_4$ ), Cer (g:  $C_{40}H_{79}NO_3$ ) and SM (h:  $C_{39}H_{79}N_2O_6P$ ) detected in zebrafish embryo.

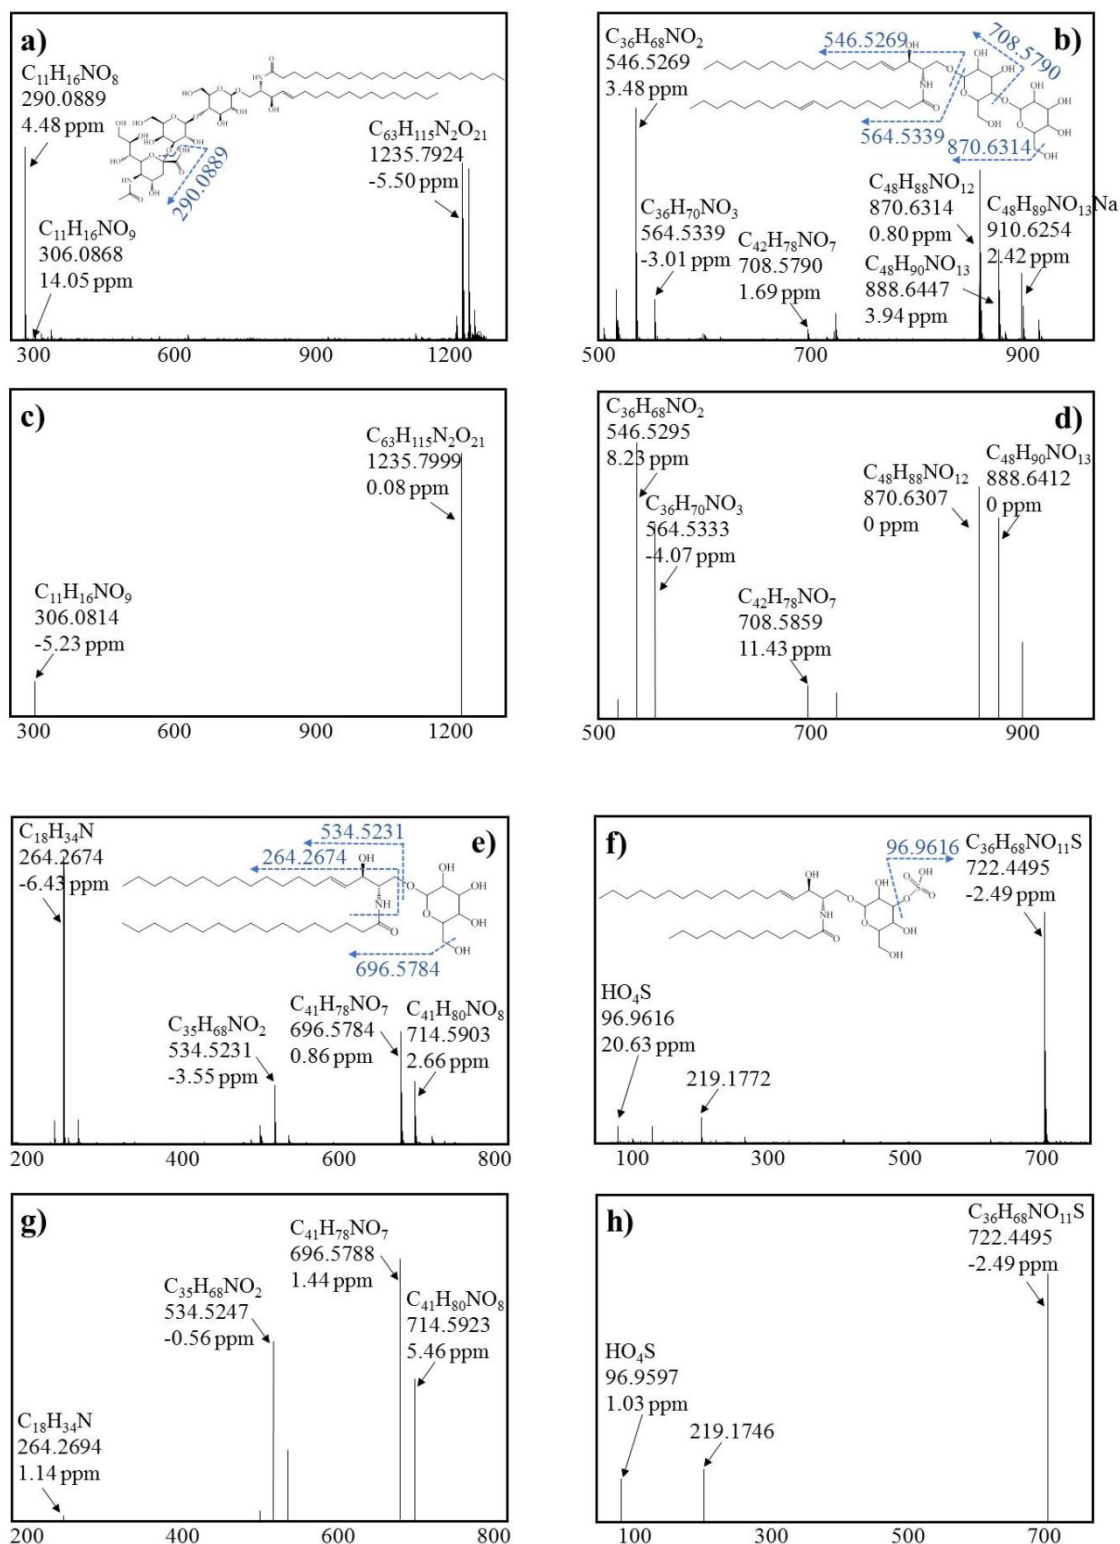

**Figure S11.** Mass spectra of standards of GM<sub>3</sub> (d40:1) (a), LacCer (b), GlcCer (e) and Sul (f). Mass spectra of GM<sub>3</sub> (c:  $C_{63}H_{116}N_2O_{21}$ ), LacCer (d:  $C_{48}H_{89}NO_{13}$ ), GlcCer (g:  $C_{41}H_{79}NO_8$ ) and Sul (h) detected in zebrafish embryo.

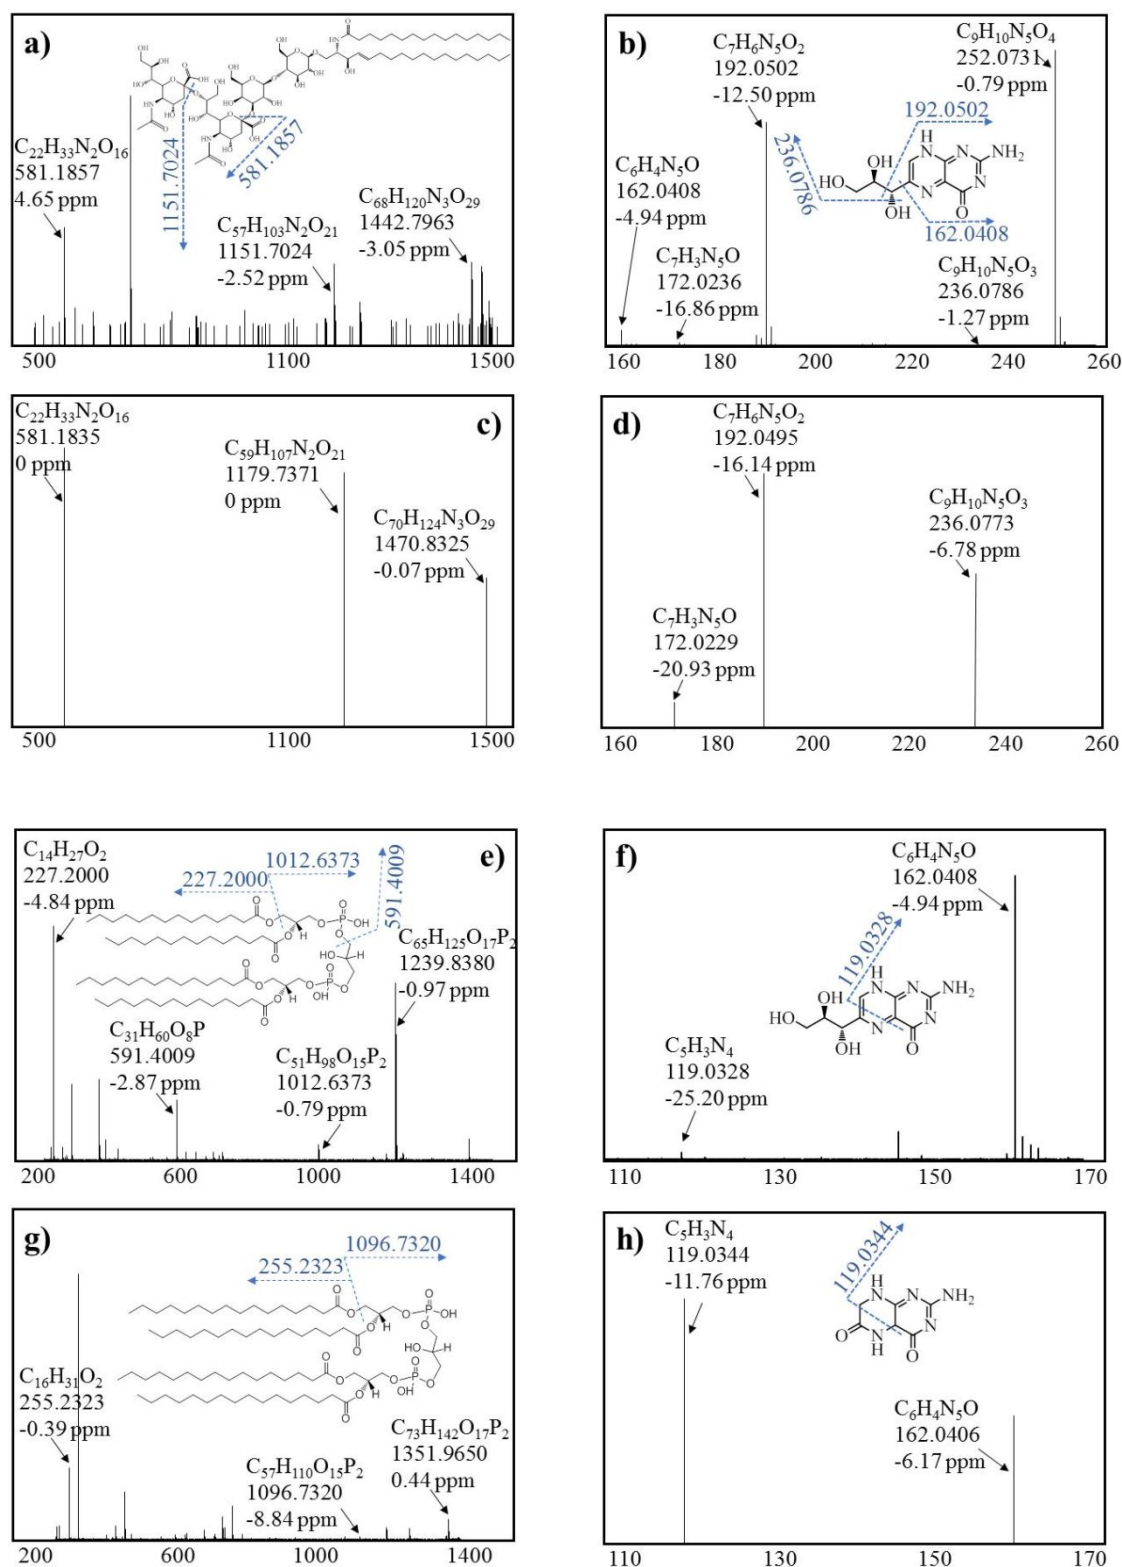

**Figure S12.** Mass spectra of standards of GD<sub>3</sub> (d34:1) (a), Neo (b, m/z 160-260; f: m/z 110-170), CL (14:0) (e) and CL (16:0) (g). Mass spectra of GD<sub>3</sub> (c: C<sub>63</sub>H<sub>116</sub>N<sub>2</sub>O<sub>21</sub>), Neo (d), and 7,8-Dihydroxanthopterin (7,8-Dixa) (h) detected in zebrafish embryo. Mass spectra of CLs detected in embryo were shown in Figure 3.

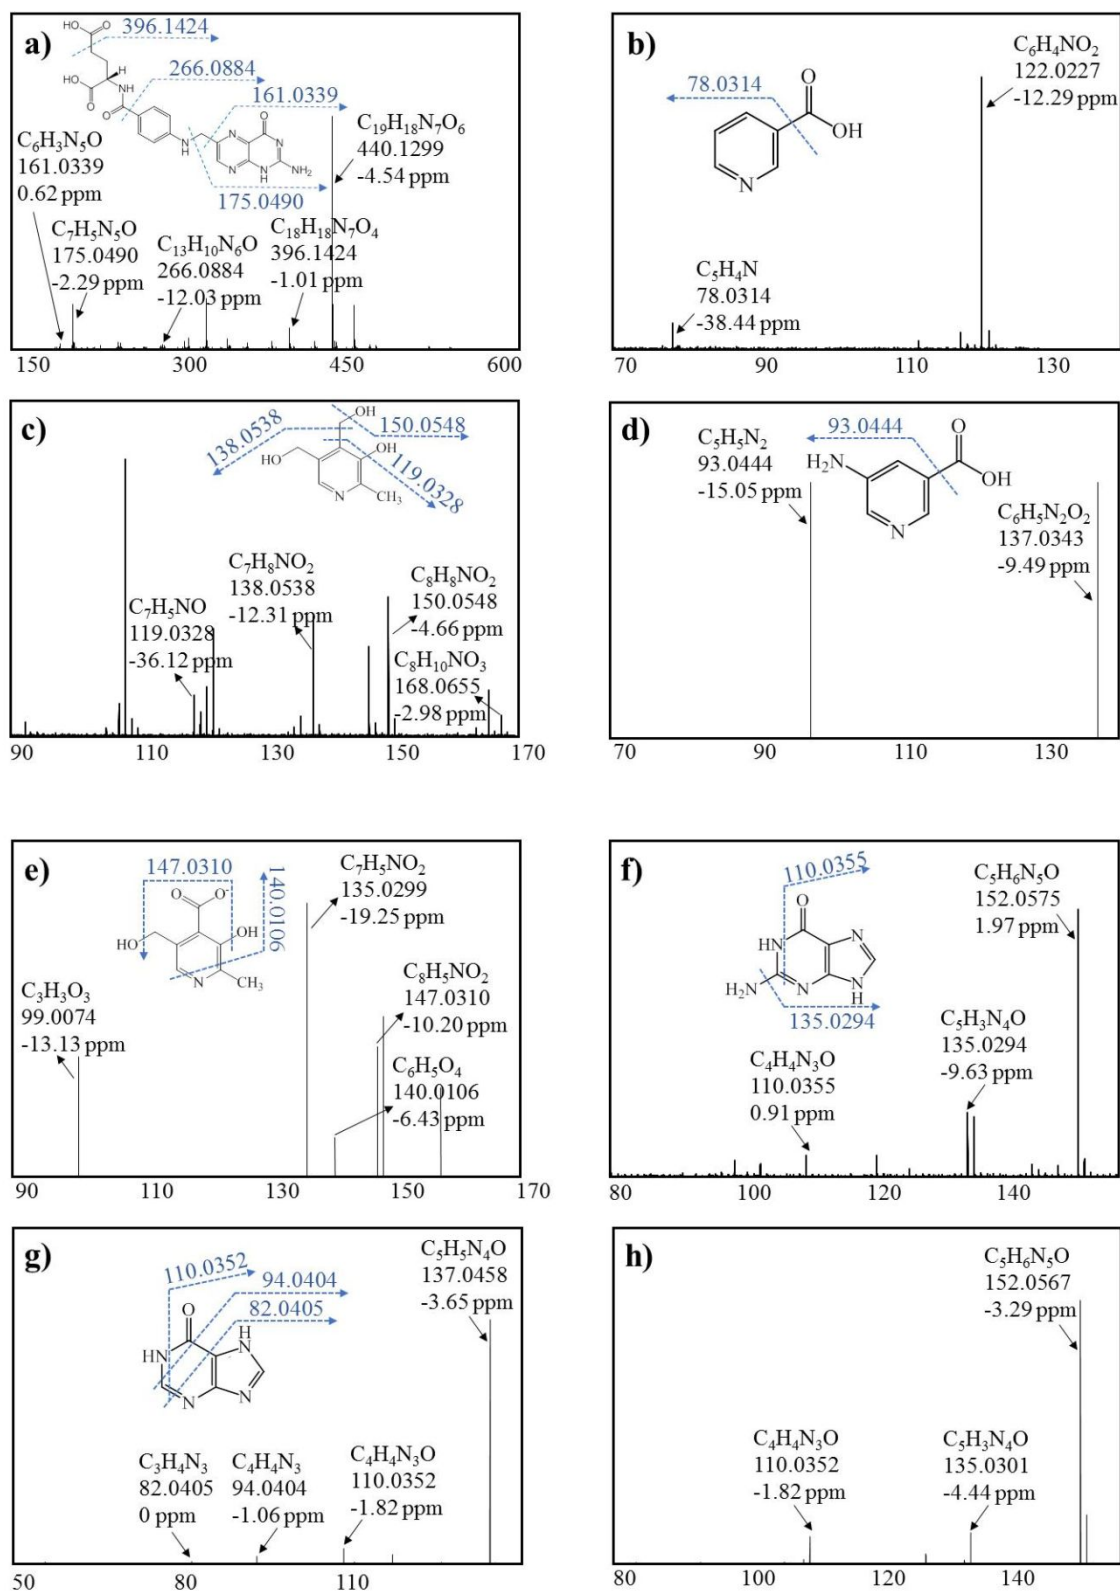

**Figure S13.** Mass spectra of standards of VB<sub>9</sub> (a), VB<sub>3</sub> (b), VB<sub>6</sub> (c), and Guanine (f). Mass spectra of VB<sub>3</sub> analogue (d), VB<sub>6</sub> analogue (e), Hypoxanthine (g), and Guanine (h) detected in zebrafish embryo.

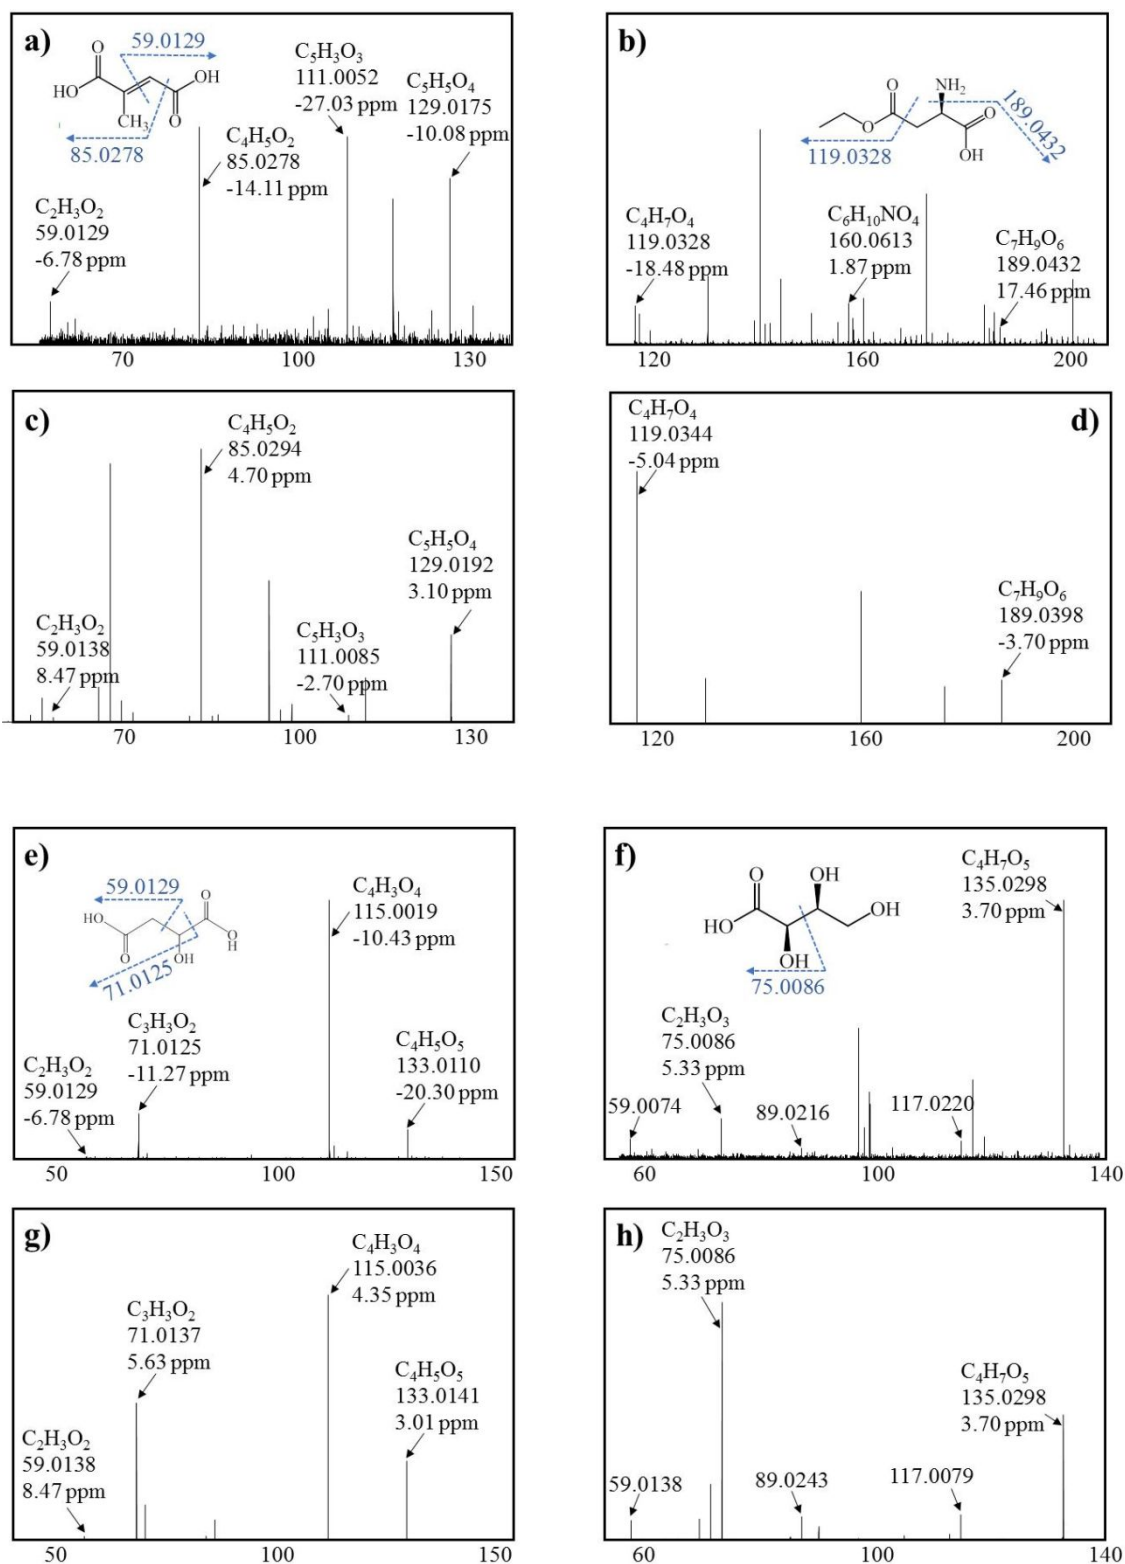

**Figure S14.** Mass spectra of standards of Mesaconate (a), 2-Amino-Succinic acid-4-Ethyl ester (b), Malate (e), and L-Threonate (f). Mass spectra of Mesaconate (c), 2-Amino-Succinic acid-4-Ethyl ester (d), Malate (g), and L-Threonate (h) detected in zebrafish embryo.



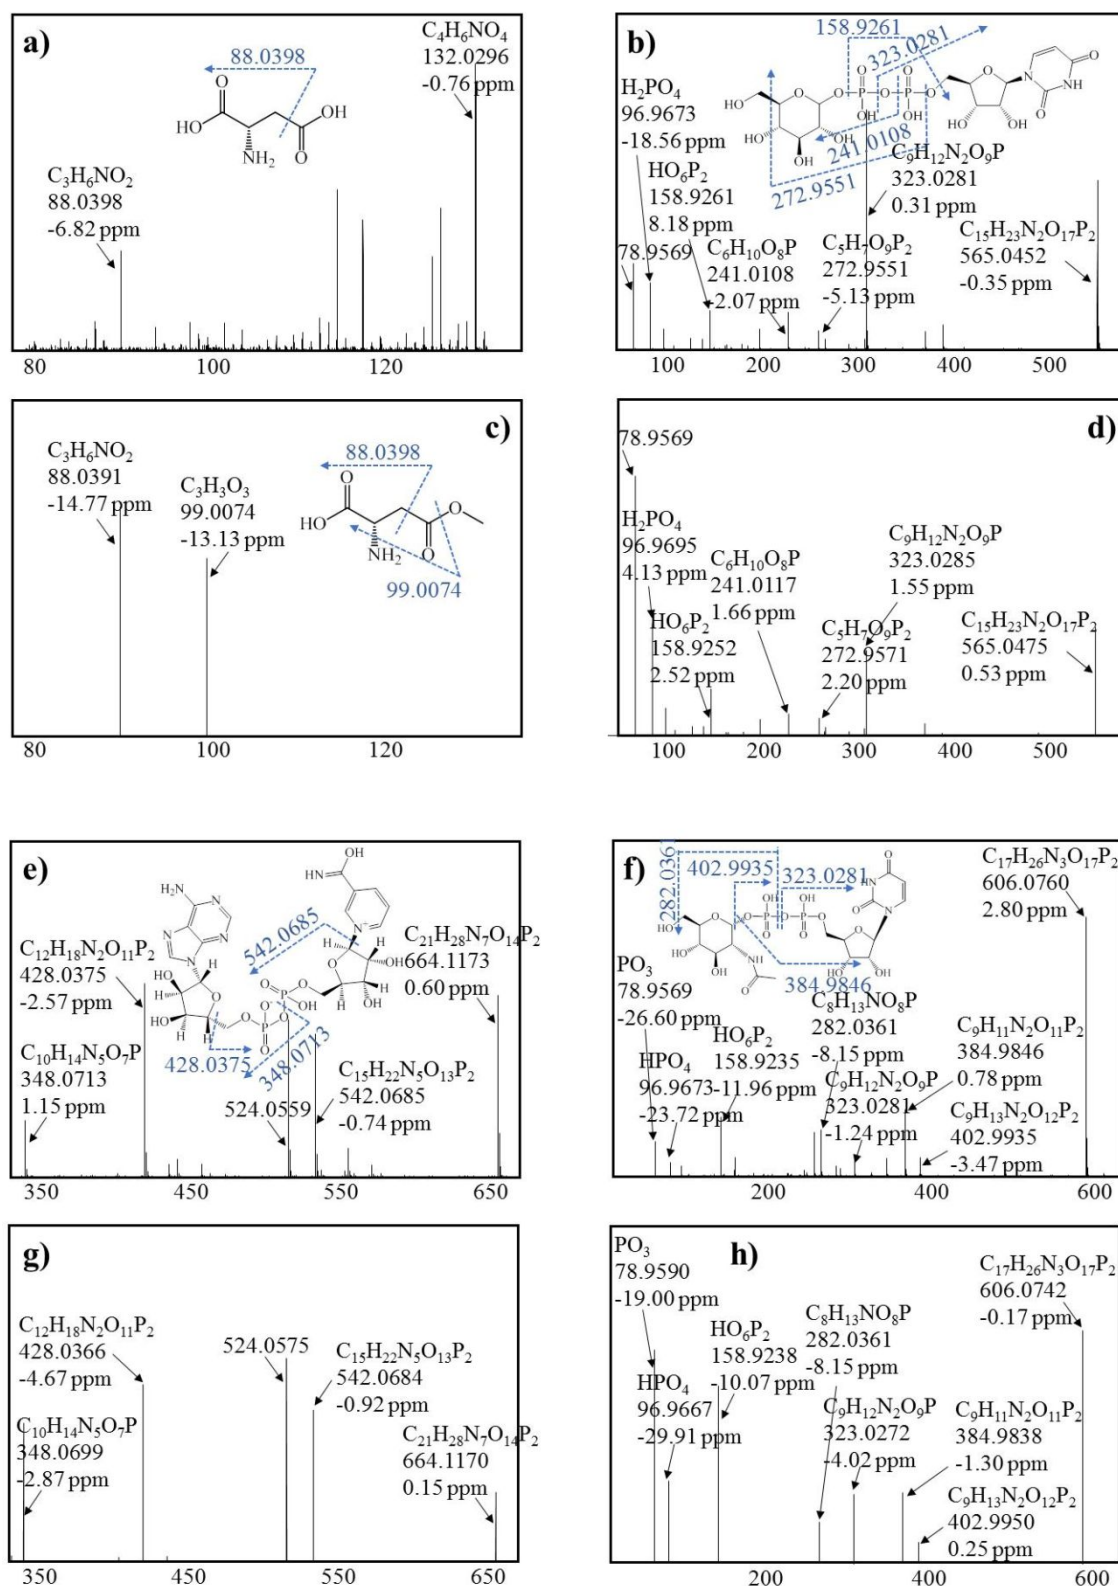

**Figure S15.** Mass spectra of standards of L-Aspartate (a), UDP- $\alpha$ -D-Glucose (b), NAD<sup>+</sup> (e), and UDP-GlcNAc (f). Mass spectra of H-Asp(OMe)-OH (c), UDP- $\alpha$ -D-Glucose (d), NAD<sup>+</sup> (g), and UDP-GlcNAc (h) detected in zebrafish embryo.

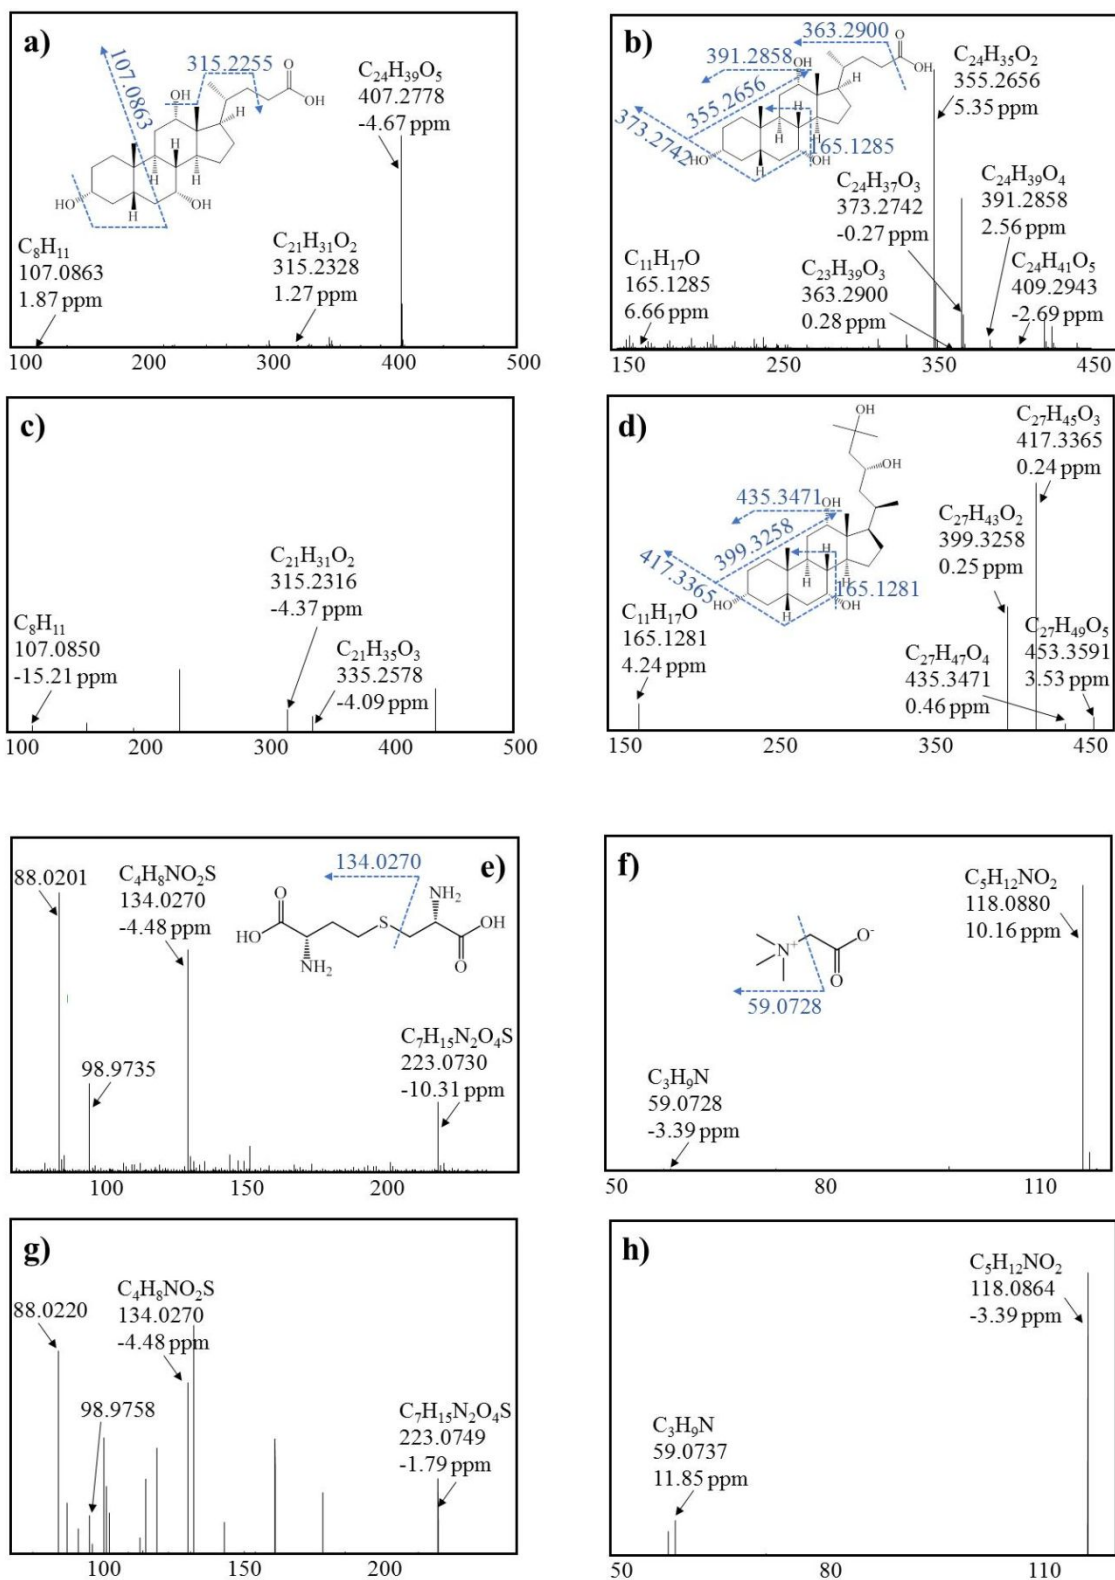

**Figure S16.** Mass spectra of standards of Cholates (a, ESI<sup>-</sup> ion mode), Cholates (b, ESI<sup>+</sup> ion mode), L-Cystathionine (e), and Betaine (f). Mass spectra of Cholates (c, ESI<sup>-</sup> ion mode), Cholestane-pentol (d), L-Cystathionine (g), and Betaine (h) detected in zebrafish embryo.







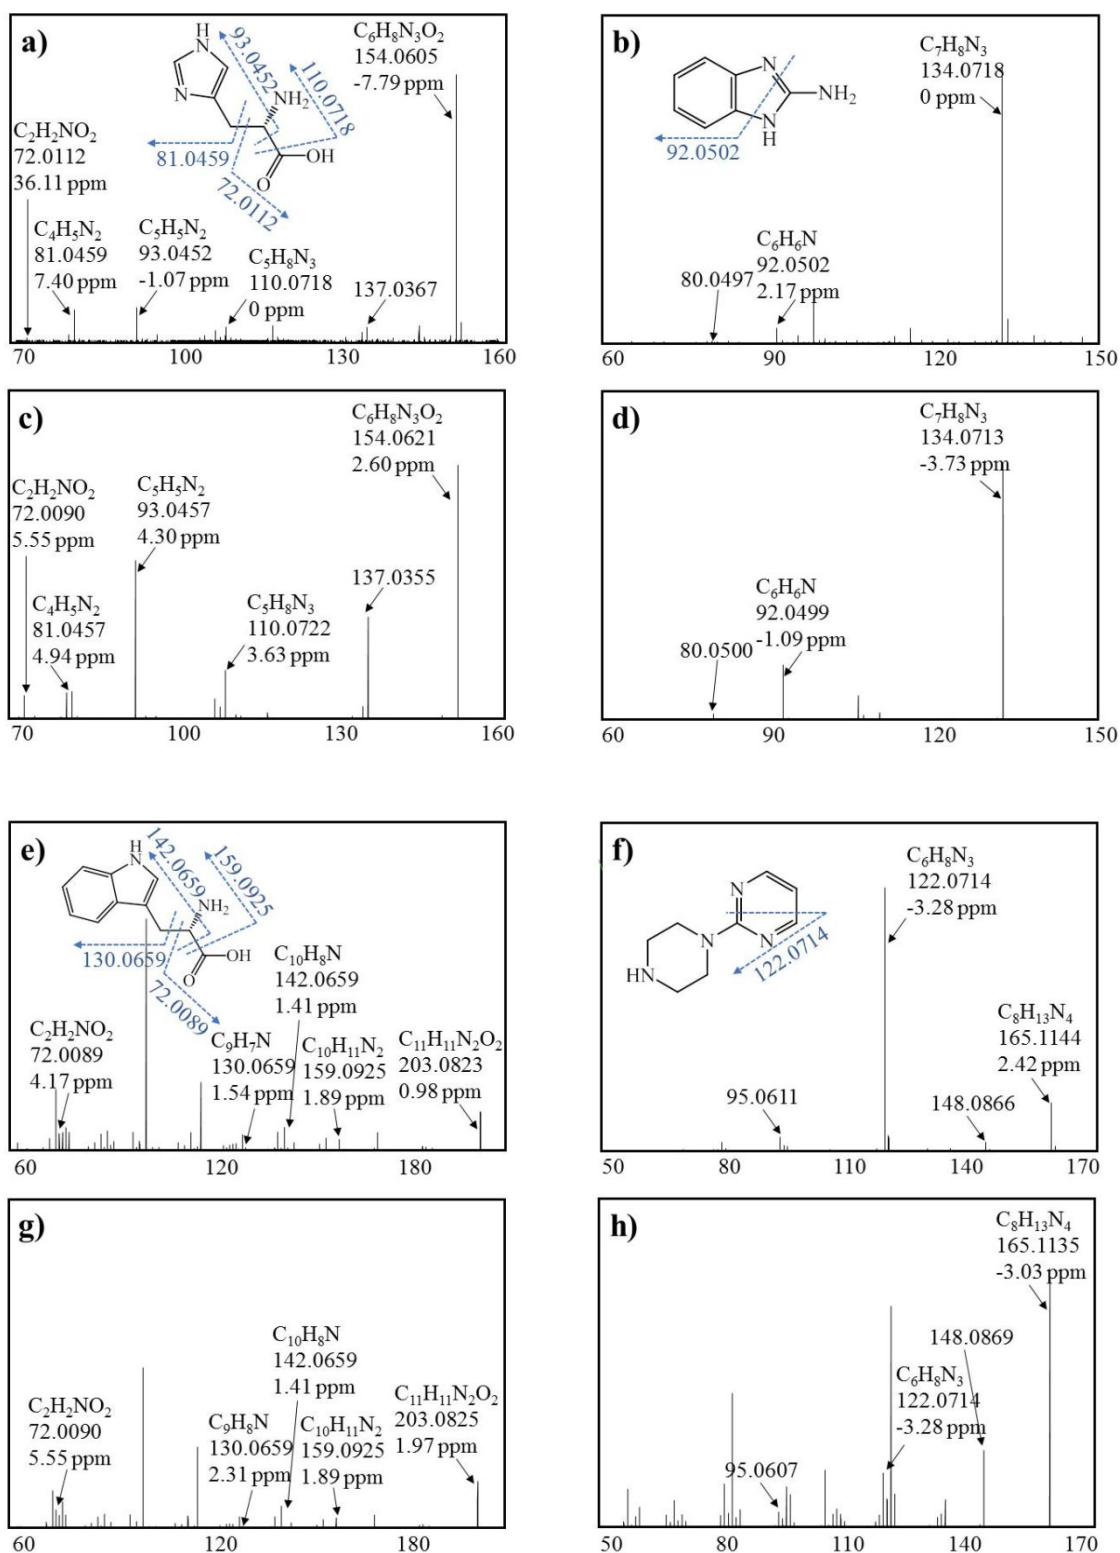

**Figure S19.** Mass spectra of standards of L-Histidine (a), 2-Aminobenzimidazole (b), L-Tryptophan (e), and 1-(2-Pyrimidyl)piperazine (f). Mass spectra of L-Histidine (c), 2-Aminobenzimidazole (d), L-Tryptophan (g), and 1-(2-Pyrimidyl)piperazine (h) detected in zebrafish embryo.



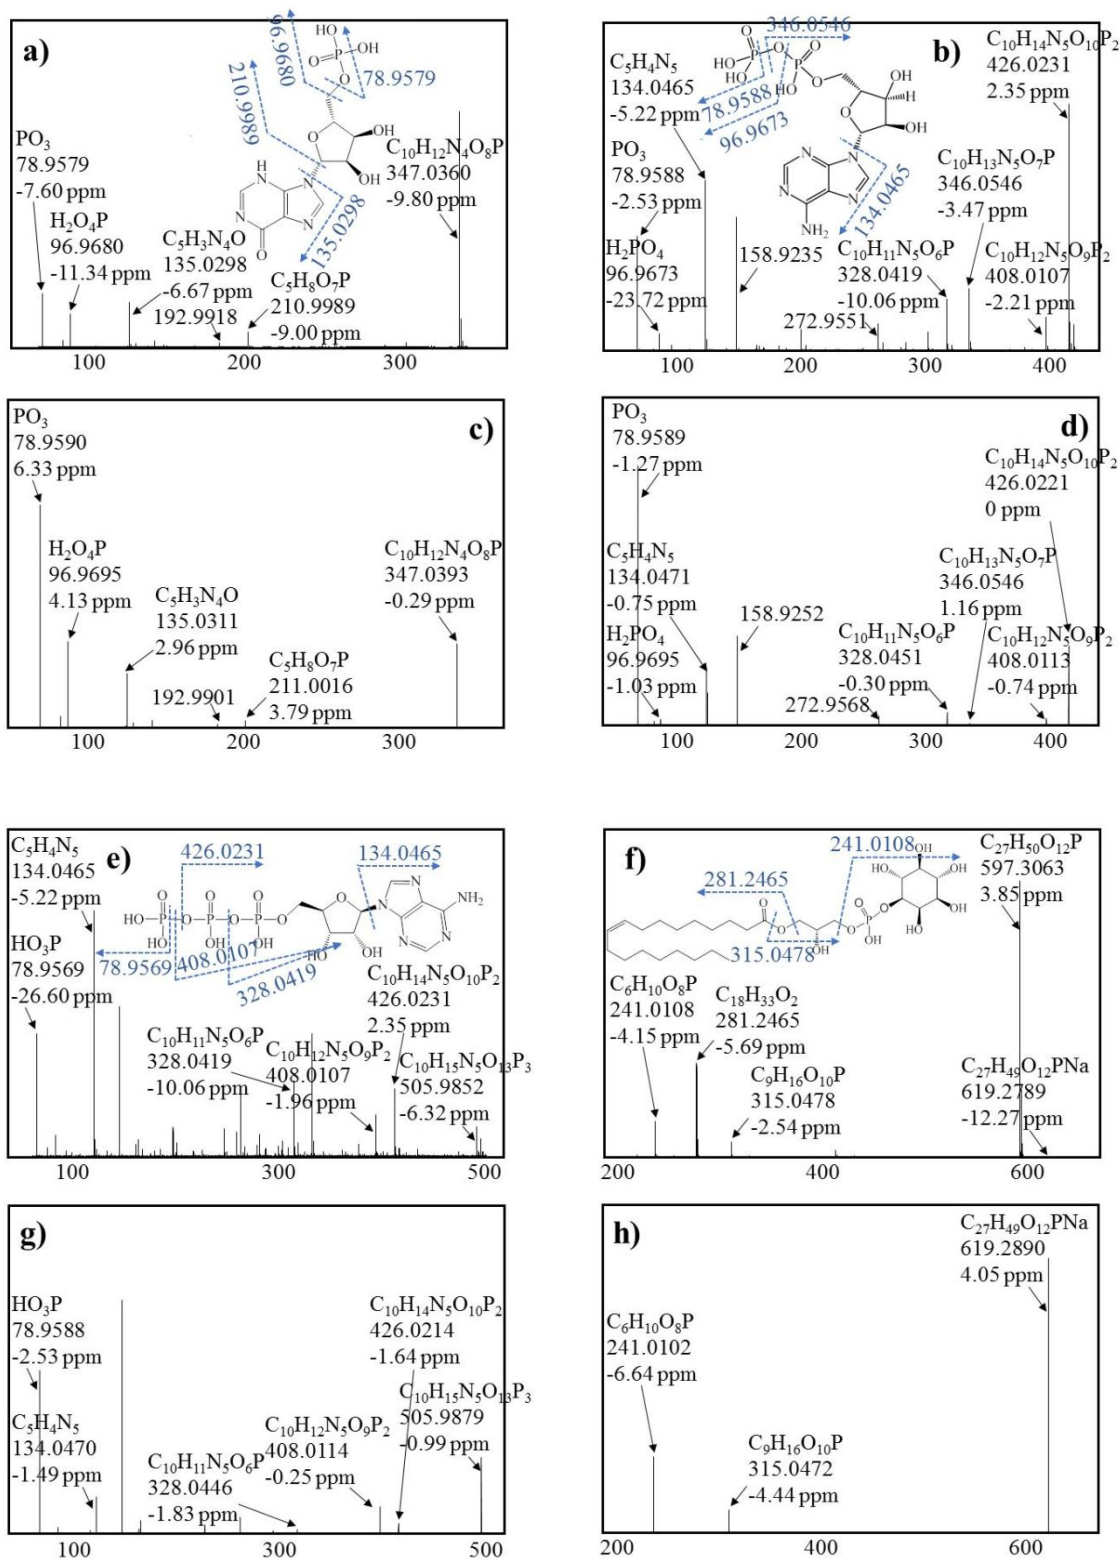

**Figure S21.** Mass spectra of standards of IMP (a), ADP (b), ATP (e), and LPI (f). Mass spectra of IMP (c), ADP (d), ATP (g), and LPI (h) detected in zebrafish embryo.

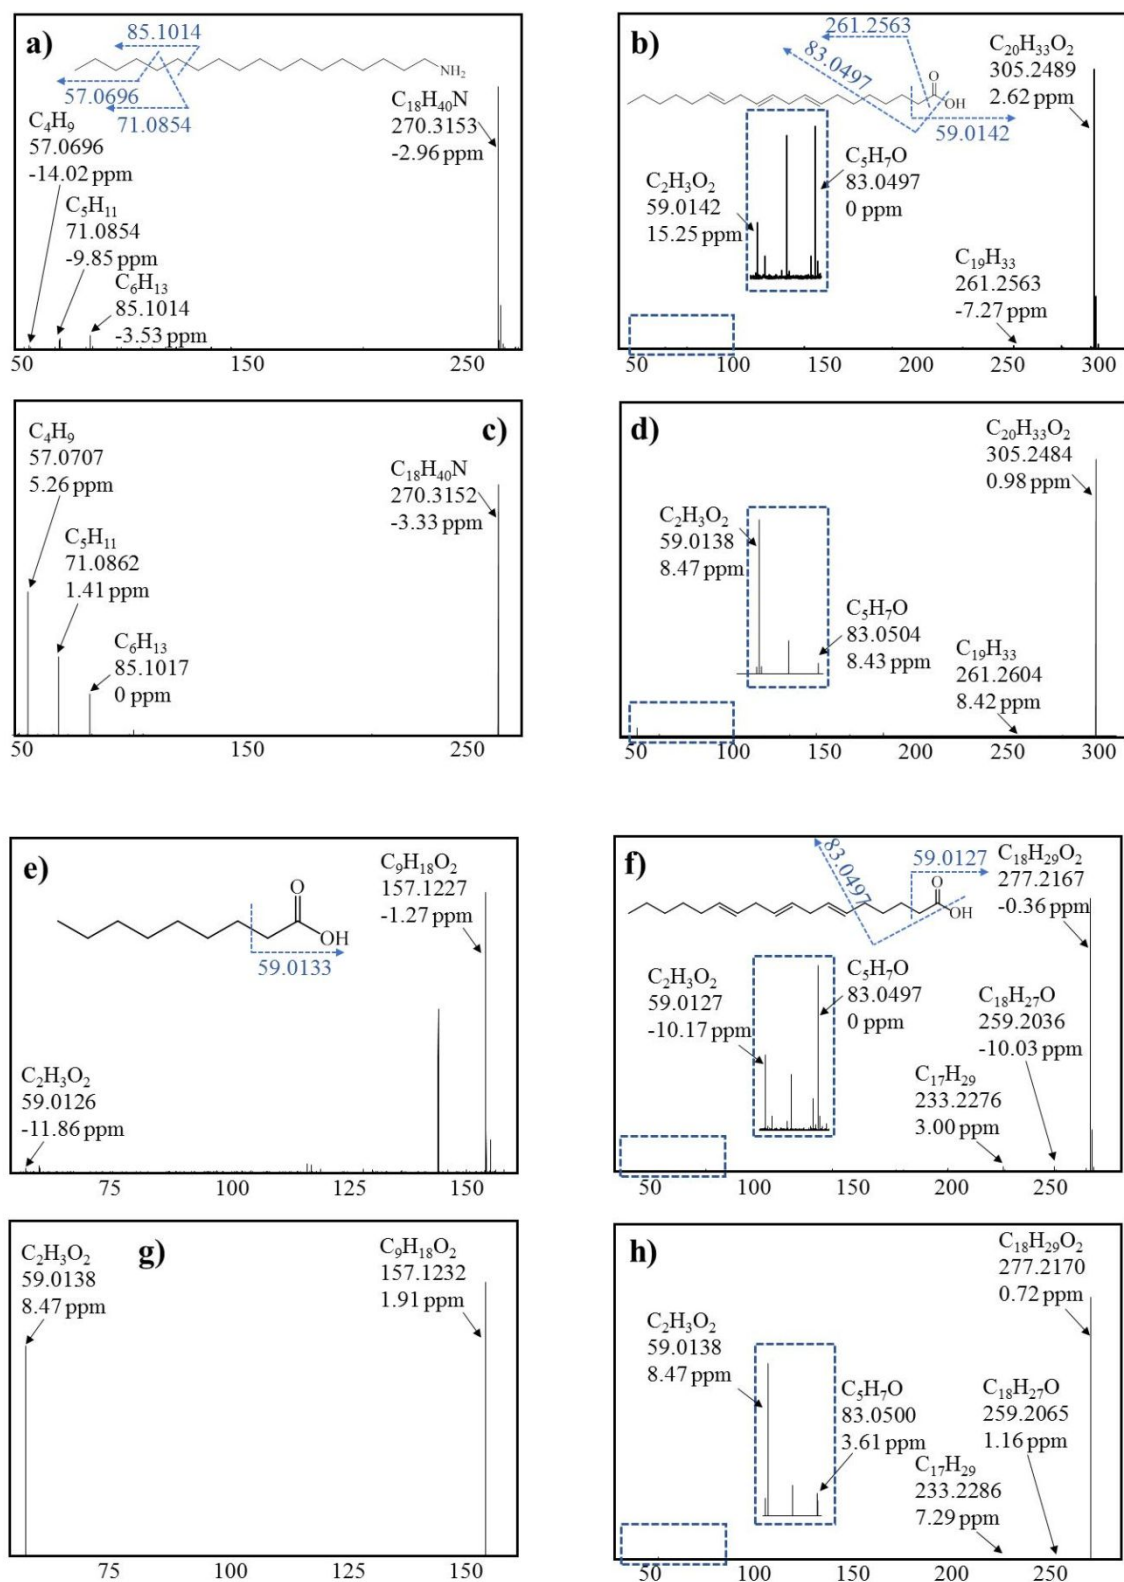

**Figure S22.** Mass spectra of standards of Octadecyl amine (a), Diho- $\gamma$ -Lin (b), Nonanoic acid (e), and  $\gamma$ -Lin (f). Mass spectra of Octadecyl amine (c), Diho- $\gamma$ -Lin (d), Nonanoic acid (g), and  $\gamma$ -Lin (h) detected in zebrafish embryo.



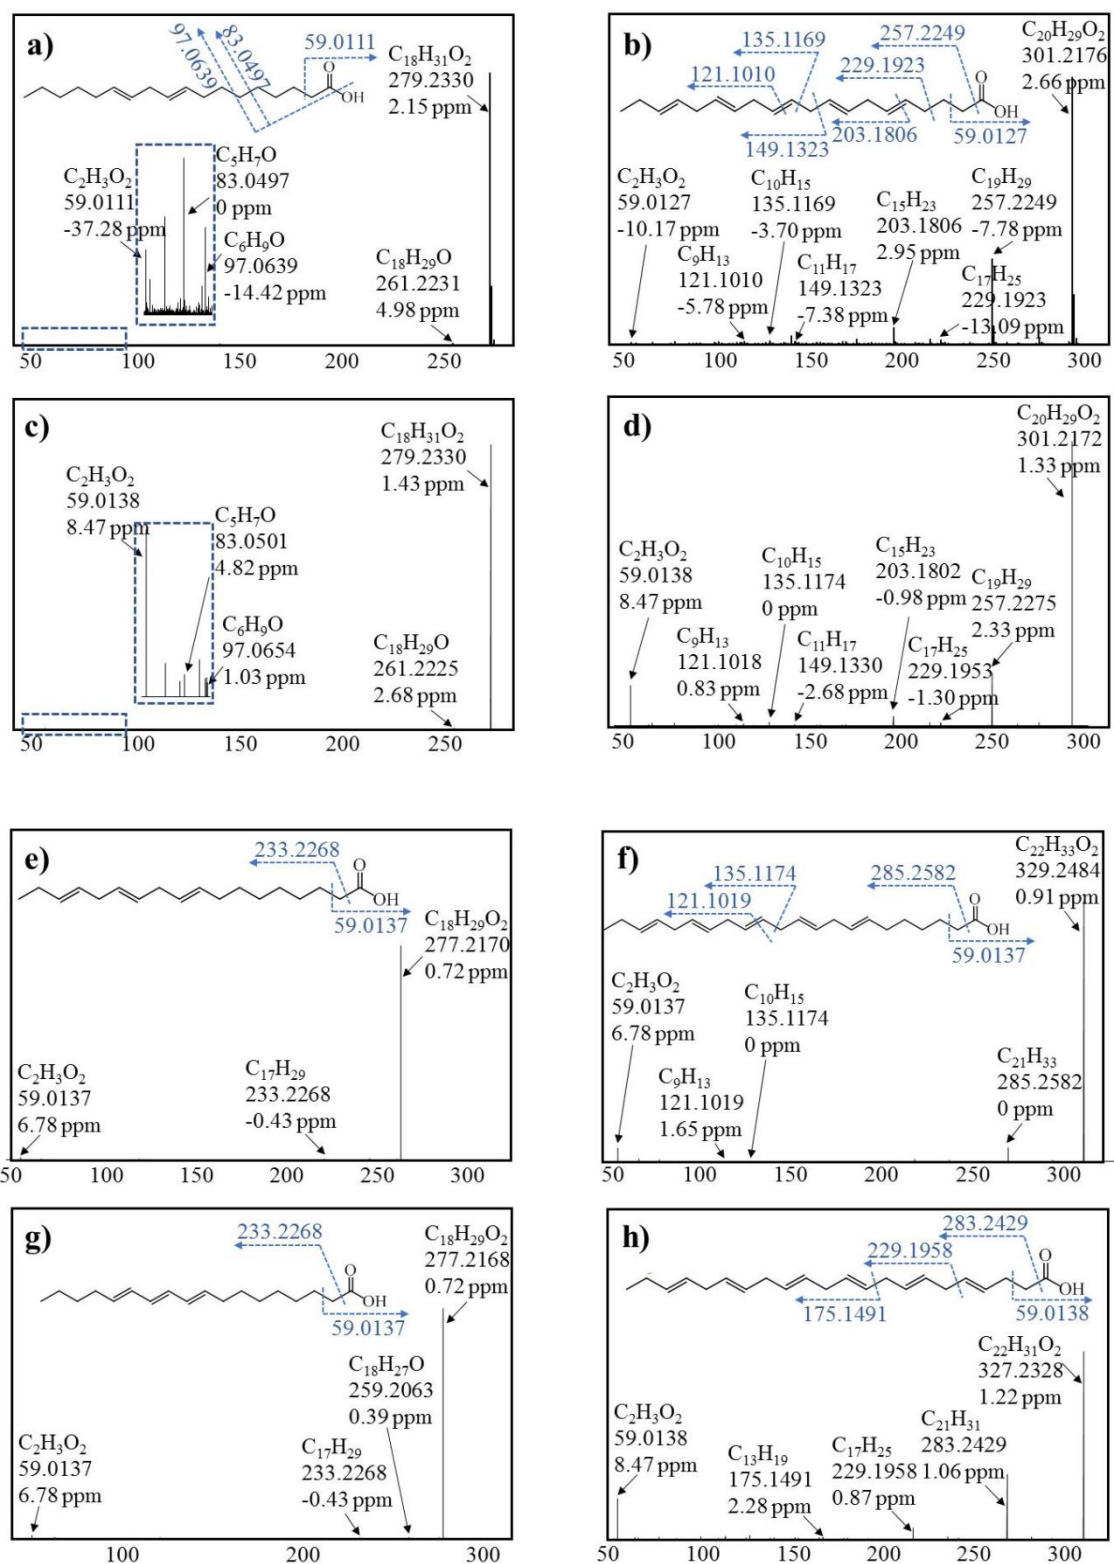

**Figure S23.** Mass spectra of standards of Lin (a), and EPA (b). Mass spectra of Lin (c), EPA (d), α-Lin (e), DPA (f), α-Eleostearic acid (g) and Docosaheaxaenoic acid (DHA), (h) detected in zebrafish embryo.

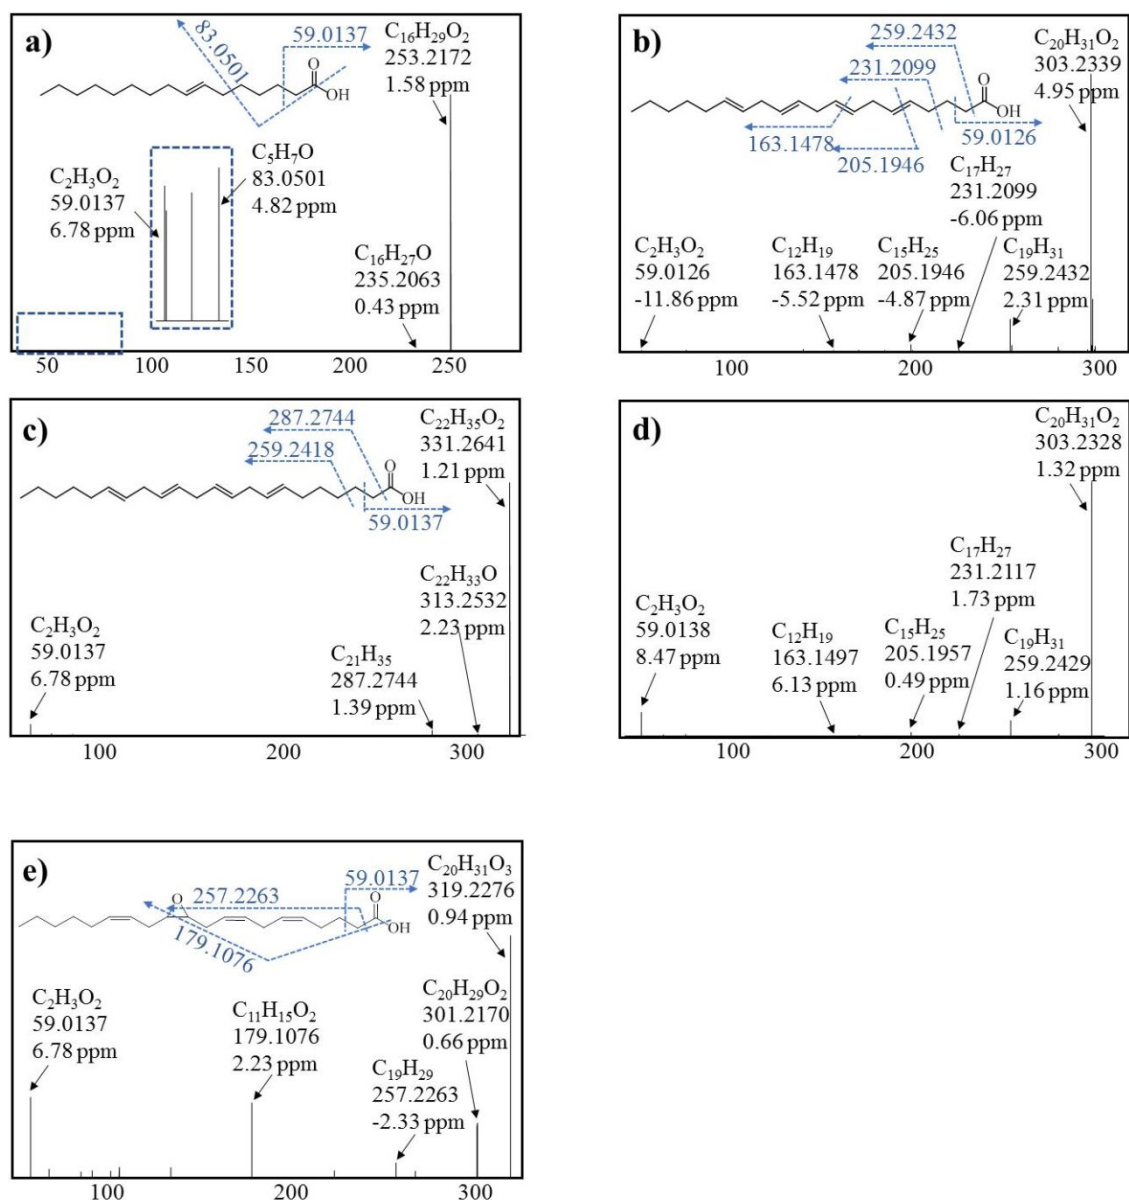

**Figure S24.** Mass spectra of standards of Ara (b). Mass spectra of Hexadecenoic acid (a), Adrenic acid (c) Ara (d), and 11,12-EET (e) detected in zebrafish embryo.

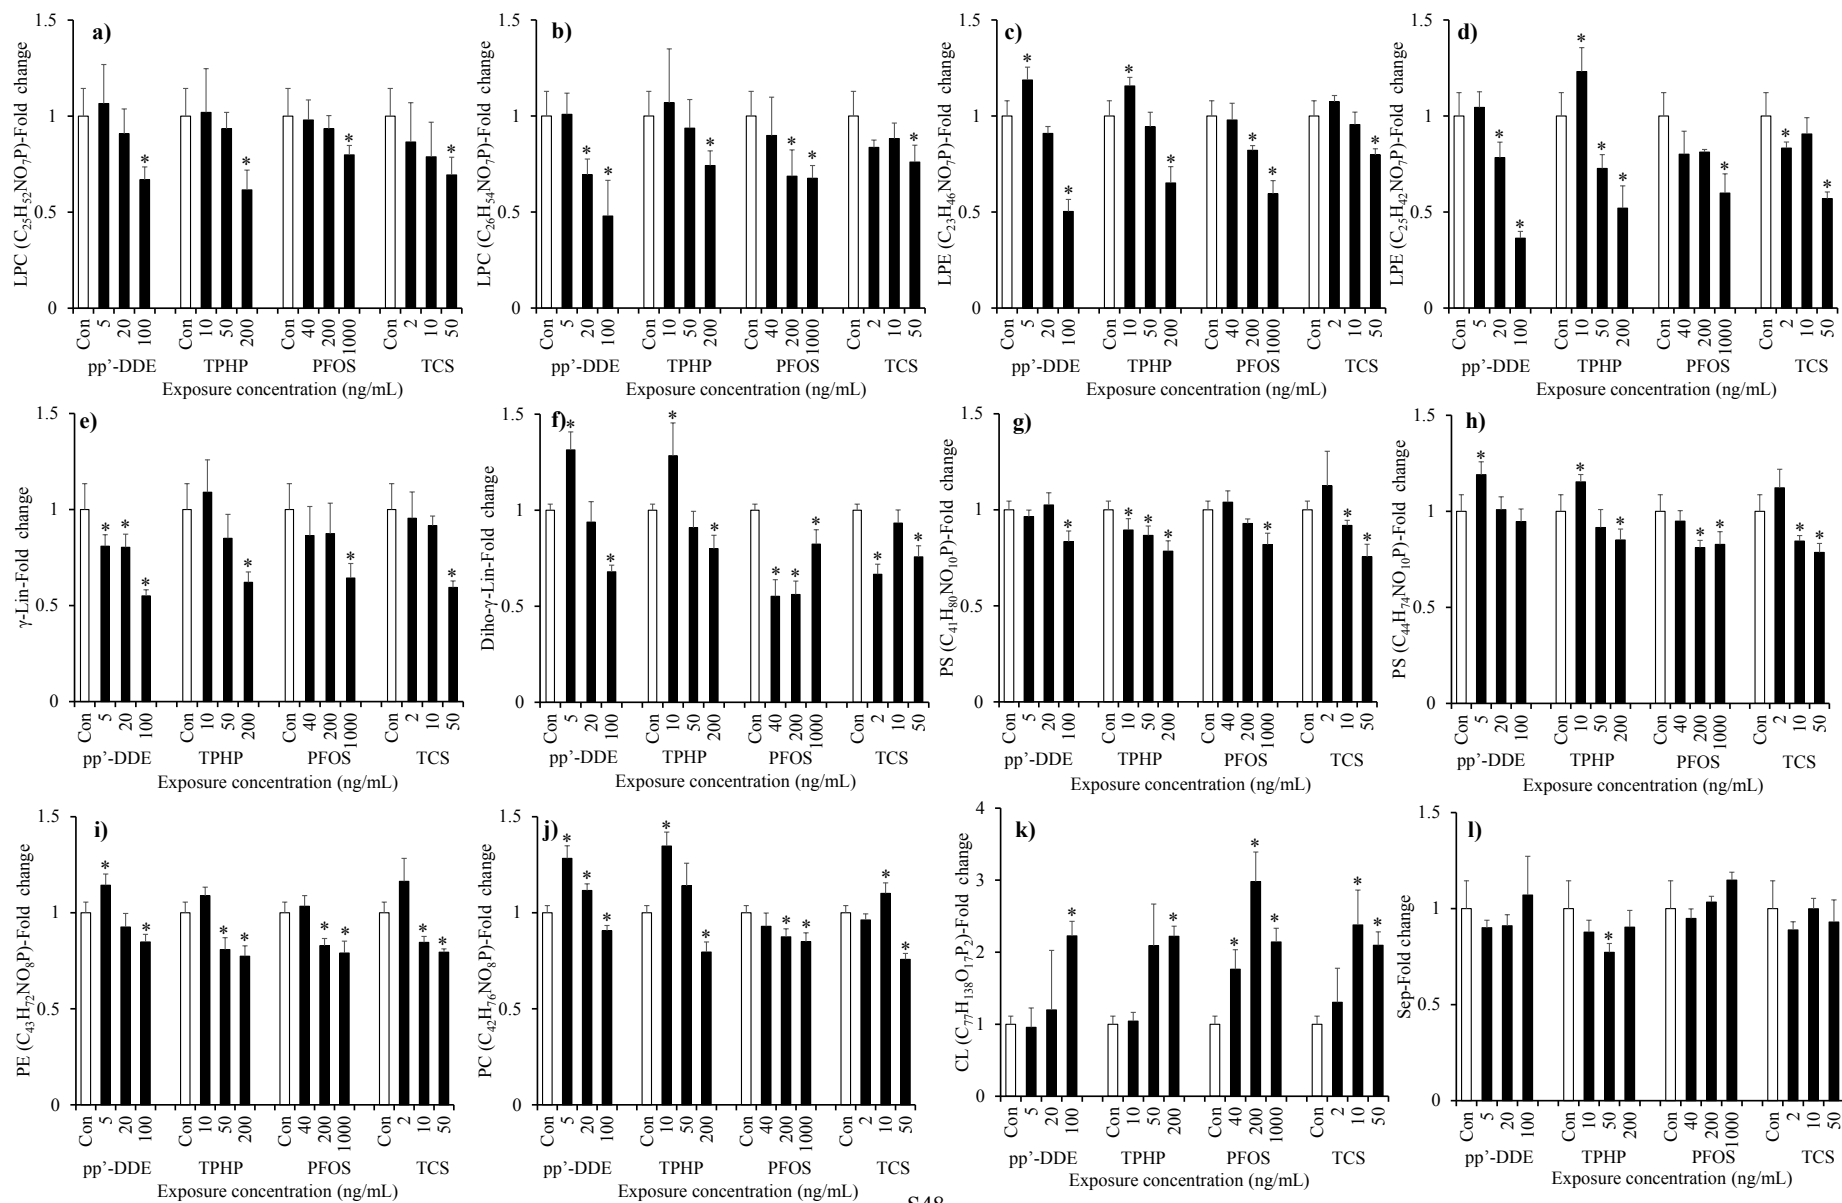



431 **Figure S25.** Dose-response of LPCs (a-b), LPEs (c-d), linoleate related PUFAs (e-f), PLs (g-j), CL (k) and Sep (l) in zebrafish embryos after  
432 exposures to pp'-DDE, TPHP, PFOS, and TCS.  
433  
434

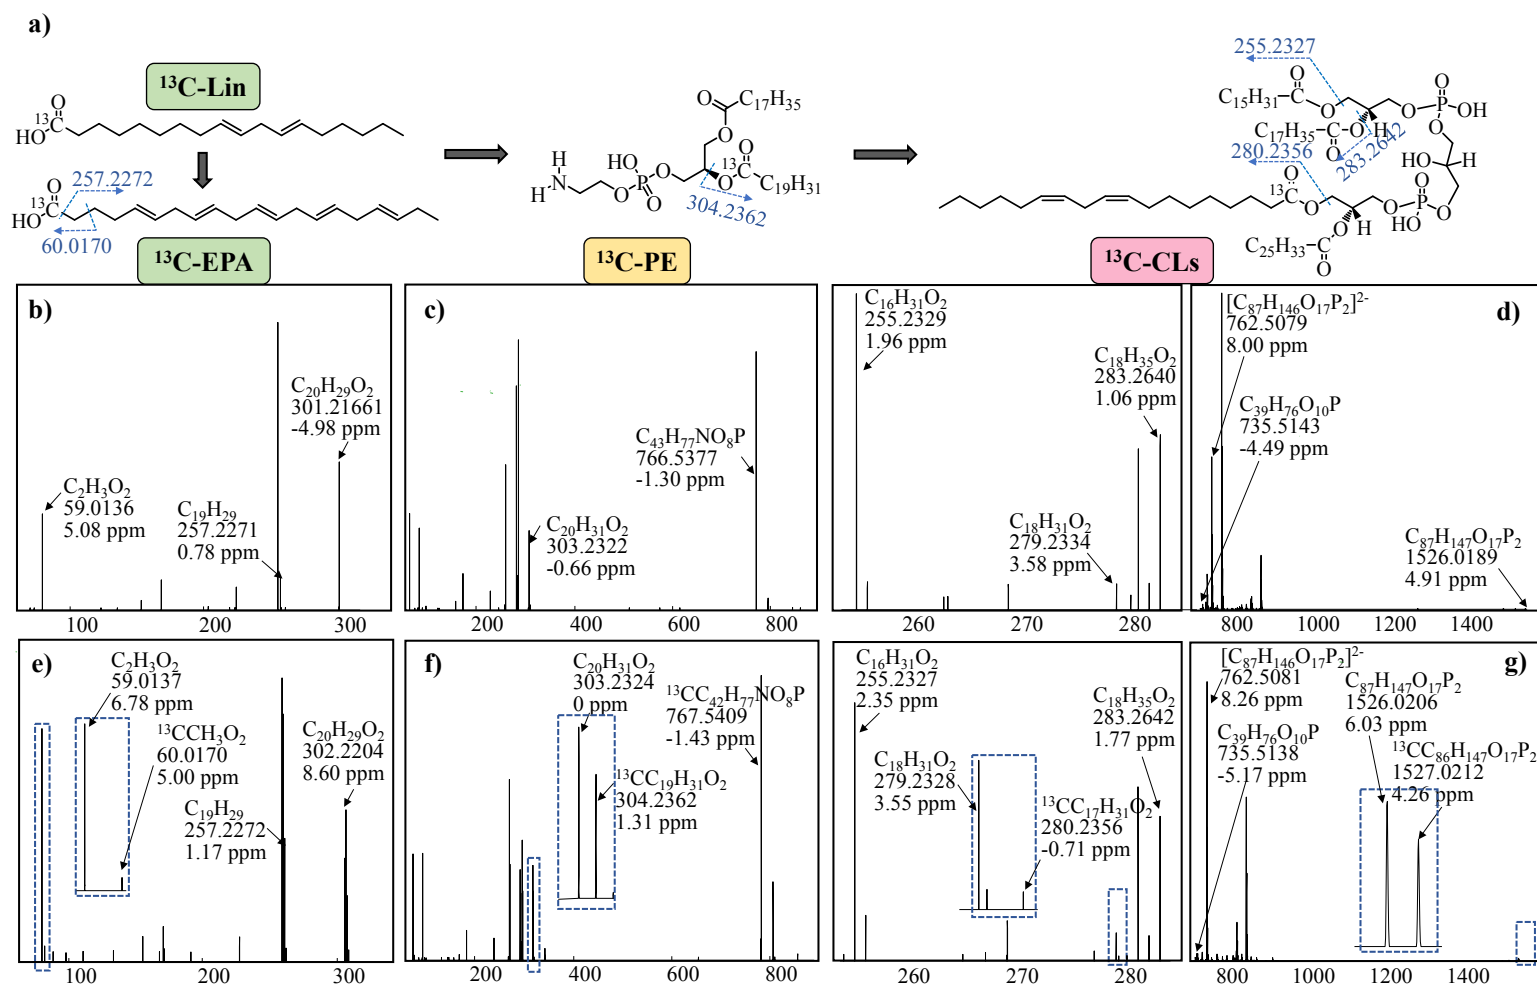

**Figure S26.** Metabolic pathways between CLs and linoleate related PUFAs. a) The detected  $^{13}\text{C}$ -labelled metabolites and their metabolic relationships in zebrafish embryos exposed to  $^{13}\text{C}$ -labeled linoleate. Mass spectra of endogenous EPA ( $\text{C}_{20}\text{H}_{30}\text{O}_2$ , b), PE ( $\text{C}_{43}\text{H}_{77}\text{NO}_8\text{P}$ , c), and CL ( $\text{C}_{87}\text{H}_{148}\text{O}_{17}\text{P}_2$ , d) in zebrafish embryos, and their corresponding  $^{13}\text{C}$ -labeled compounds ( $^{13}\text{CC}_{19}\text{H}_{30}\text{O}_2$ , e;  $^{13}\text{CC}_{42}\text{H}_{78}\text{NO}_8\text{P}$ , f;  $^{13}\text{CC}_{86}\text{H}_{148}\text{O}_{17}\text{P}_2$ , g).

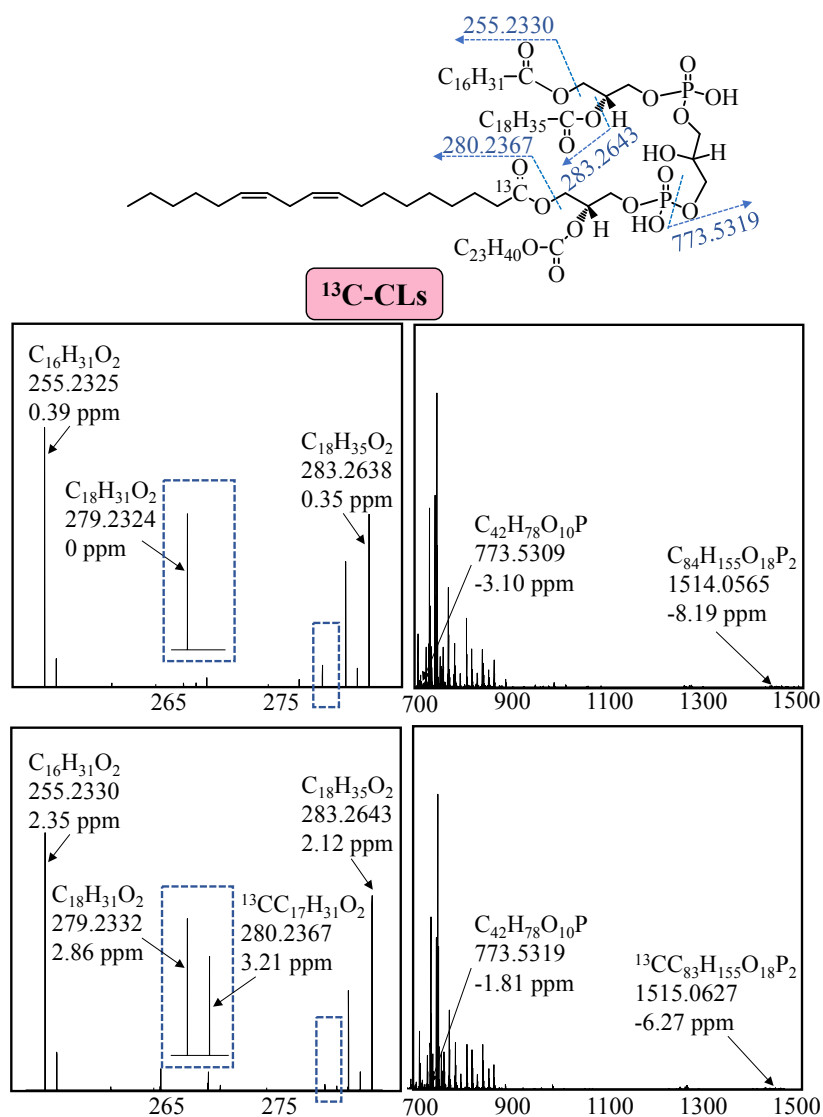

**Figure S27.** Mass spectra of endogenous CL ( $\text{C}_{84}\text{H}_{156}\text{O}_{18}\text{P}_2$ ) in zebrafish embryos, and their corresponding  $^{13}\text{C}$ -labeled compounds ( $^{13}\text{CC}_{83}\text{H}_{156}\text{O}_{18}\text{P}_2$ ).

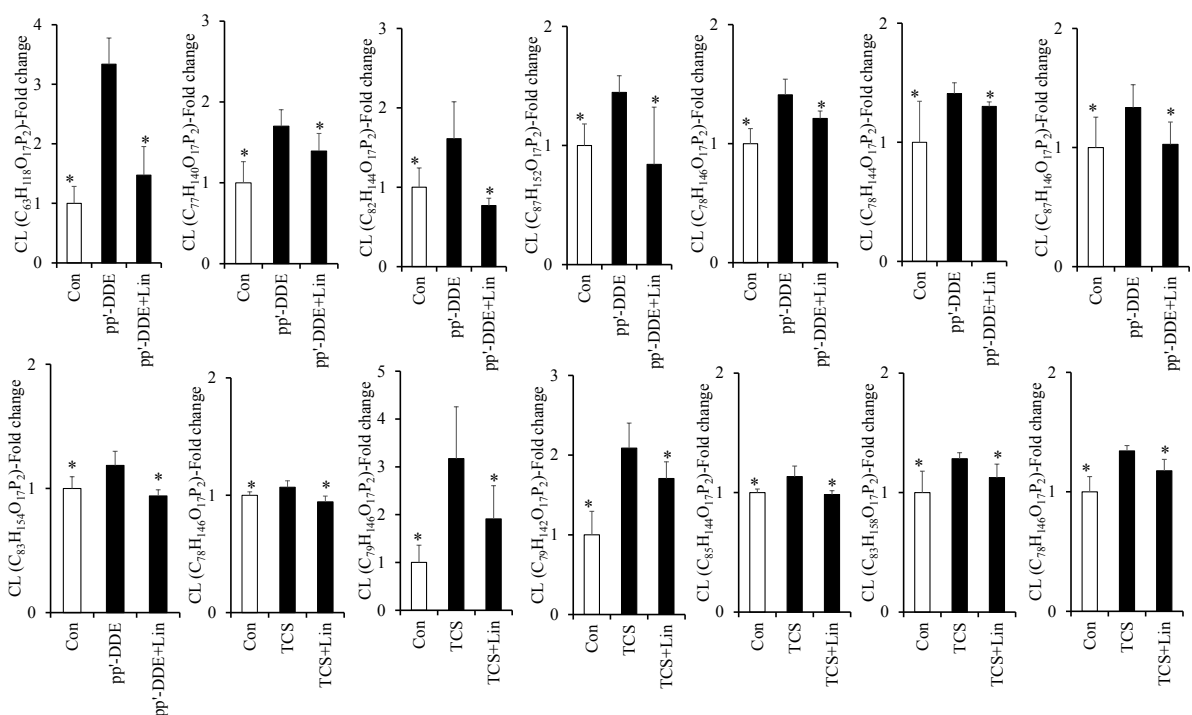

**Figure S28.** Variations in CL levels in zebrafish embryos exposed to individual chemicals (pp'-DDE or TCS) or co-exposed to chemicals and linoleate (pp'-DDE+ linoleate or TCS+ linoleate).

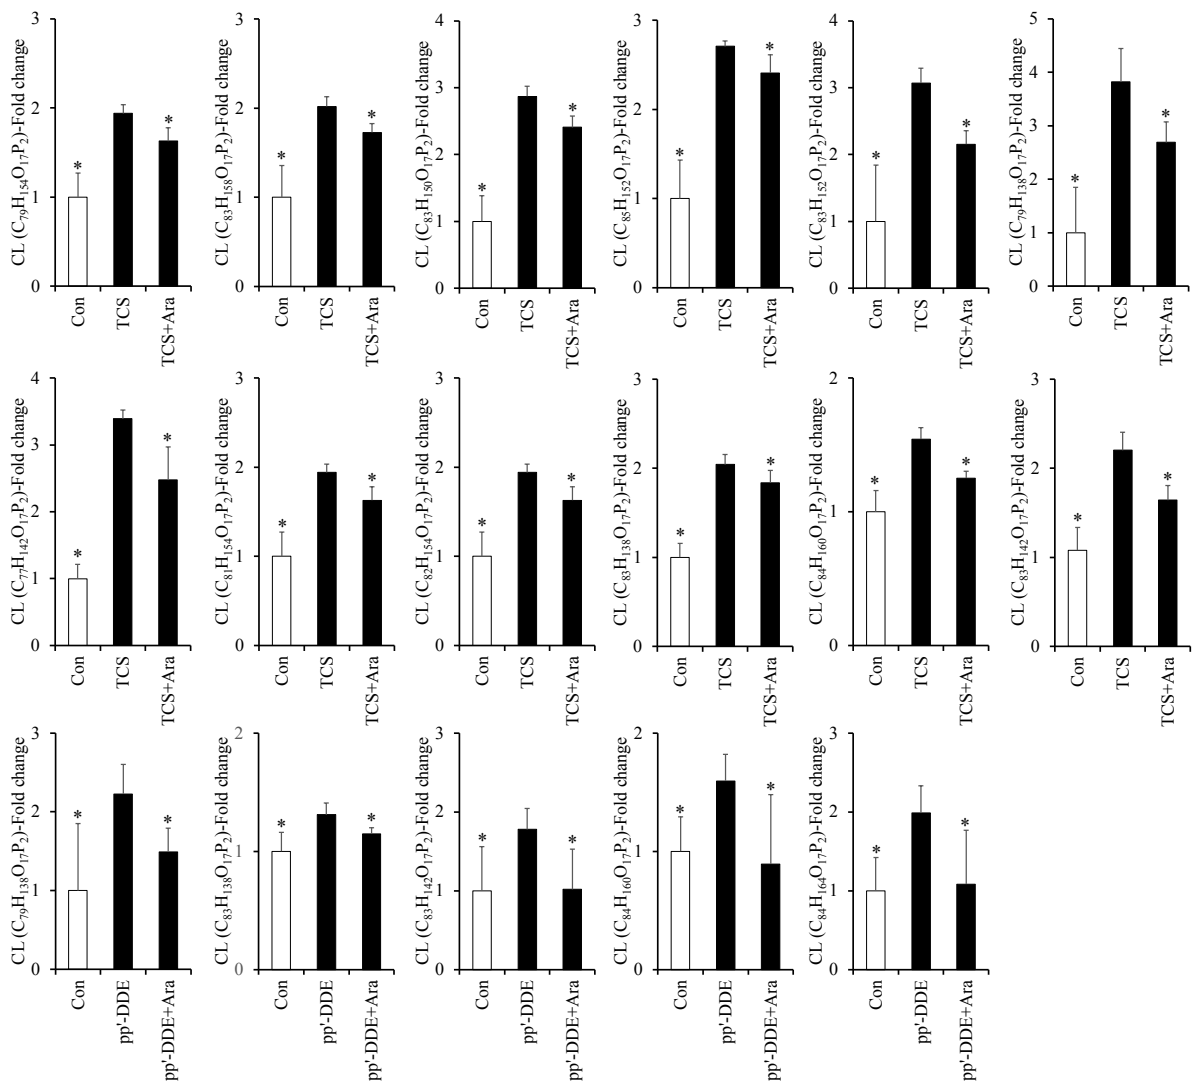

**Figure S29.** Variations in CL levels in zebrafish embryos exposed to individual chemicals (pp'-DDE or TCS) or co-exposed to chemicals and arachidonate (pp'-DDE+ arachidonate or TCS+ arachidonate).

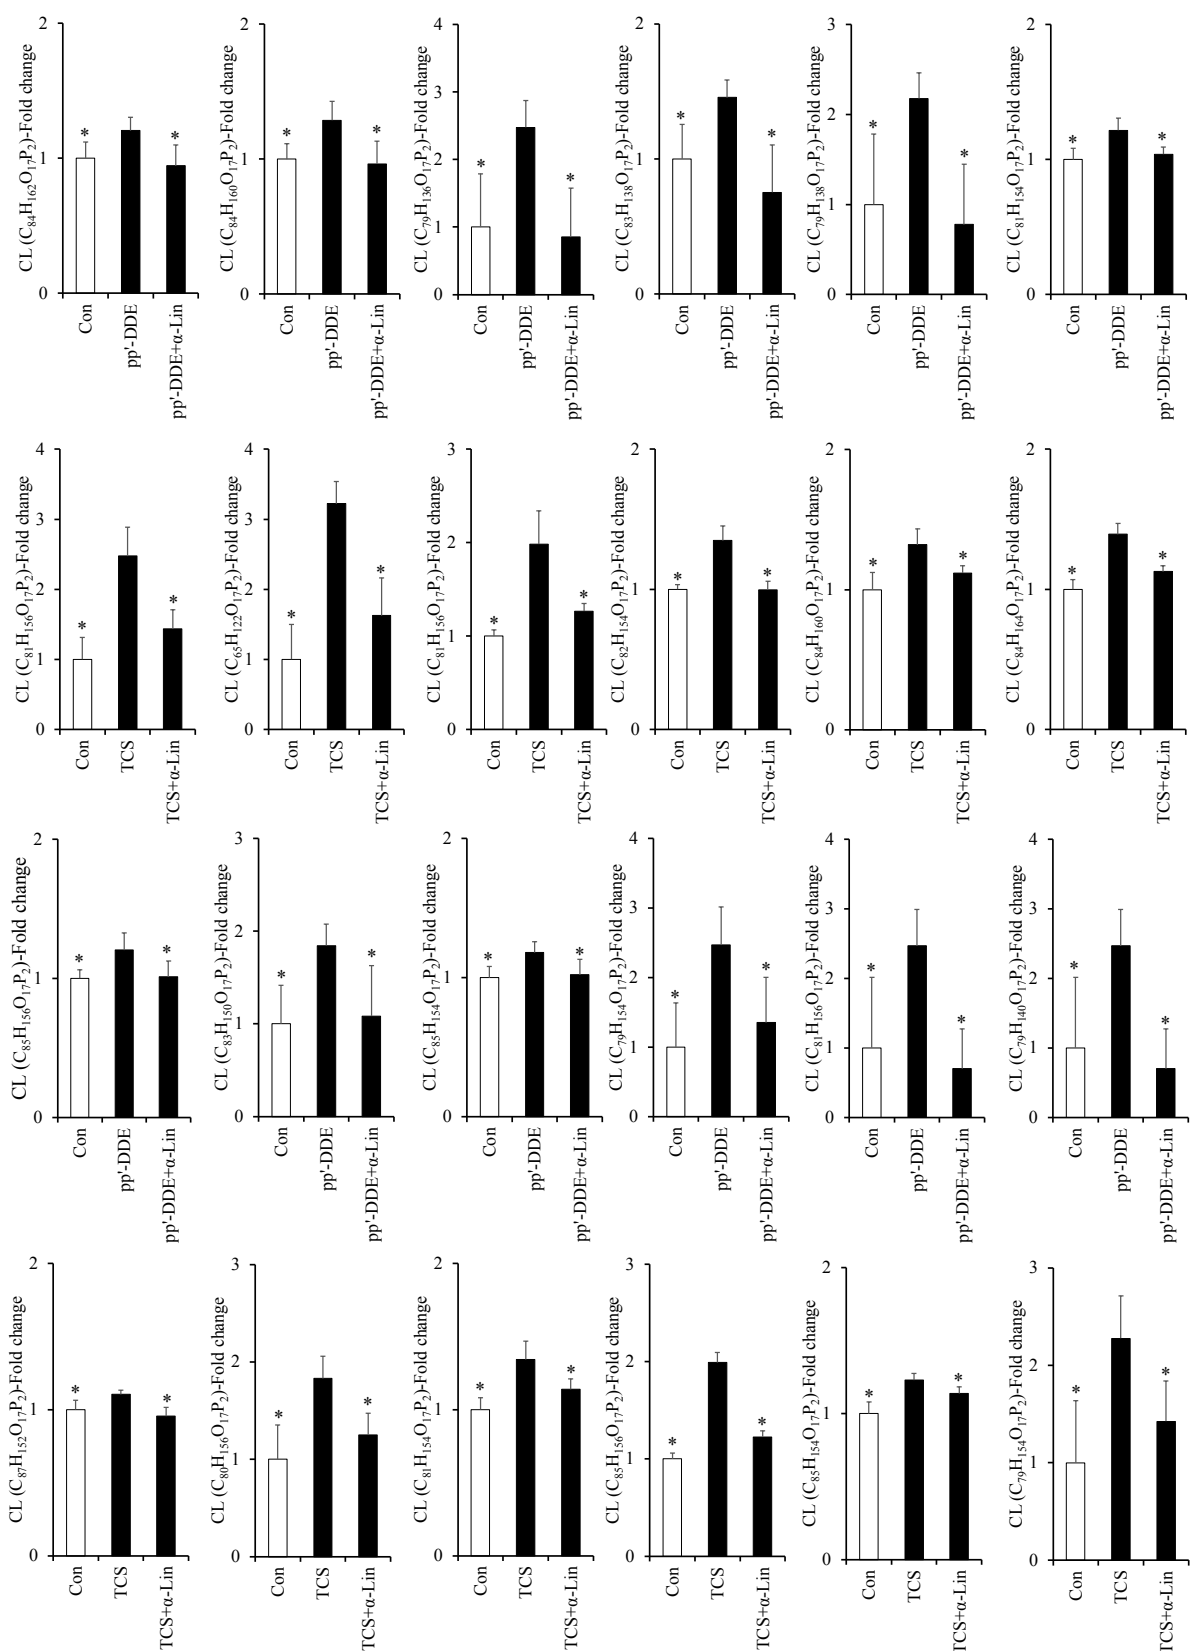

**Figure S30.** Variations in CL levels in zebrafish embryos exposed to individual chemicals (pp'-DDE or TCS) or co-exposed to chemicals and α-linoleate (pp'-DDE+α-linoleate or TCS+α-linoleate).

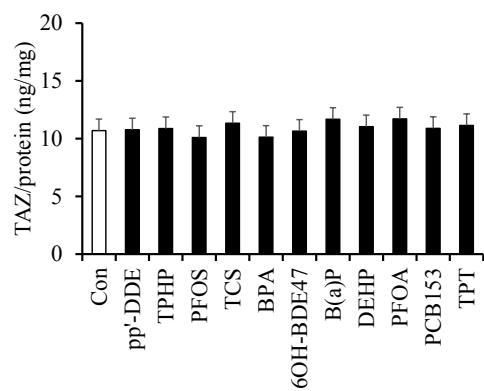

**Figure S31.** Levels of TAZ in zebrafish embryos exposed to the 11 chemicals.

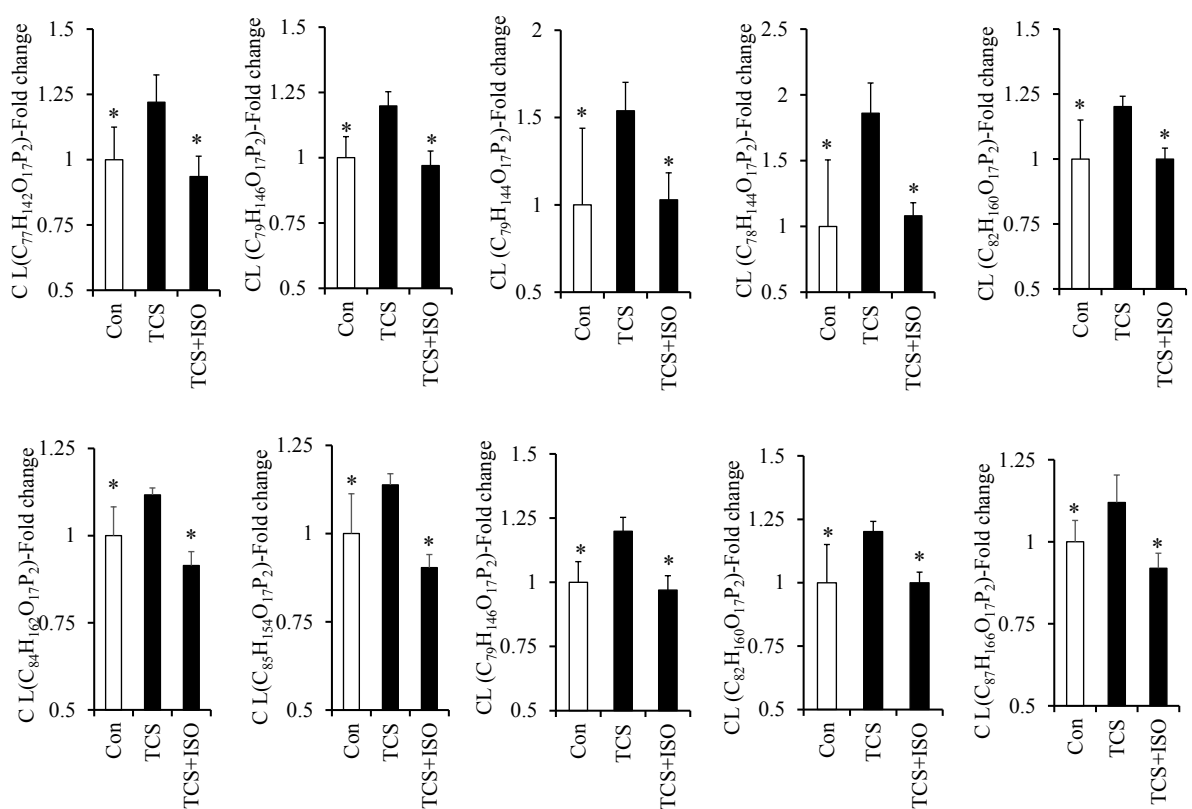

**Figure S32.** Variations in CL levels in zebrafish embryos exposed to TCS or co-exposed to TCS and ISO.



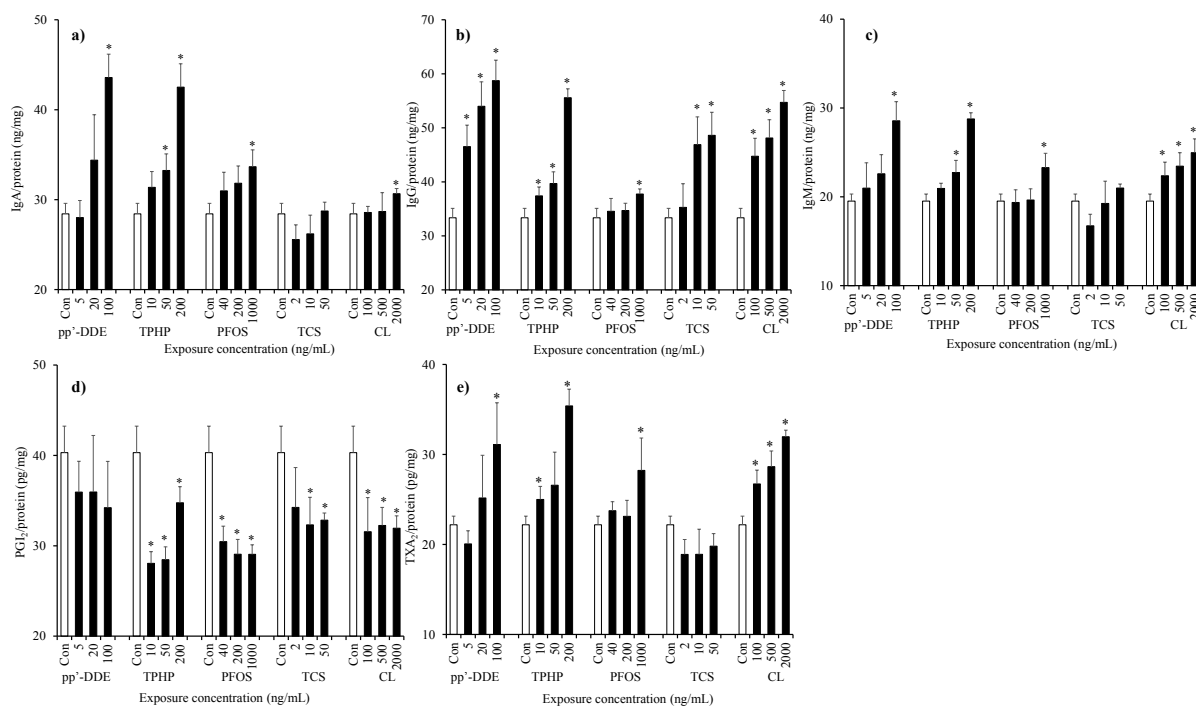

**Figure S33.** Levels of ACAs (a-c),  $\text{PGI}_2$  (d), and  $\text{TXA}_2$  (e) in zebrafish embryos exposed to the CL disrupting chemicals (pp'-DDE, TPHP, PFOS, and TCS) and CL at different concentrations.

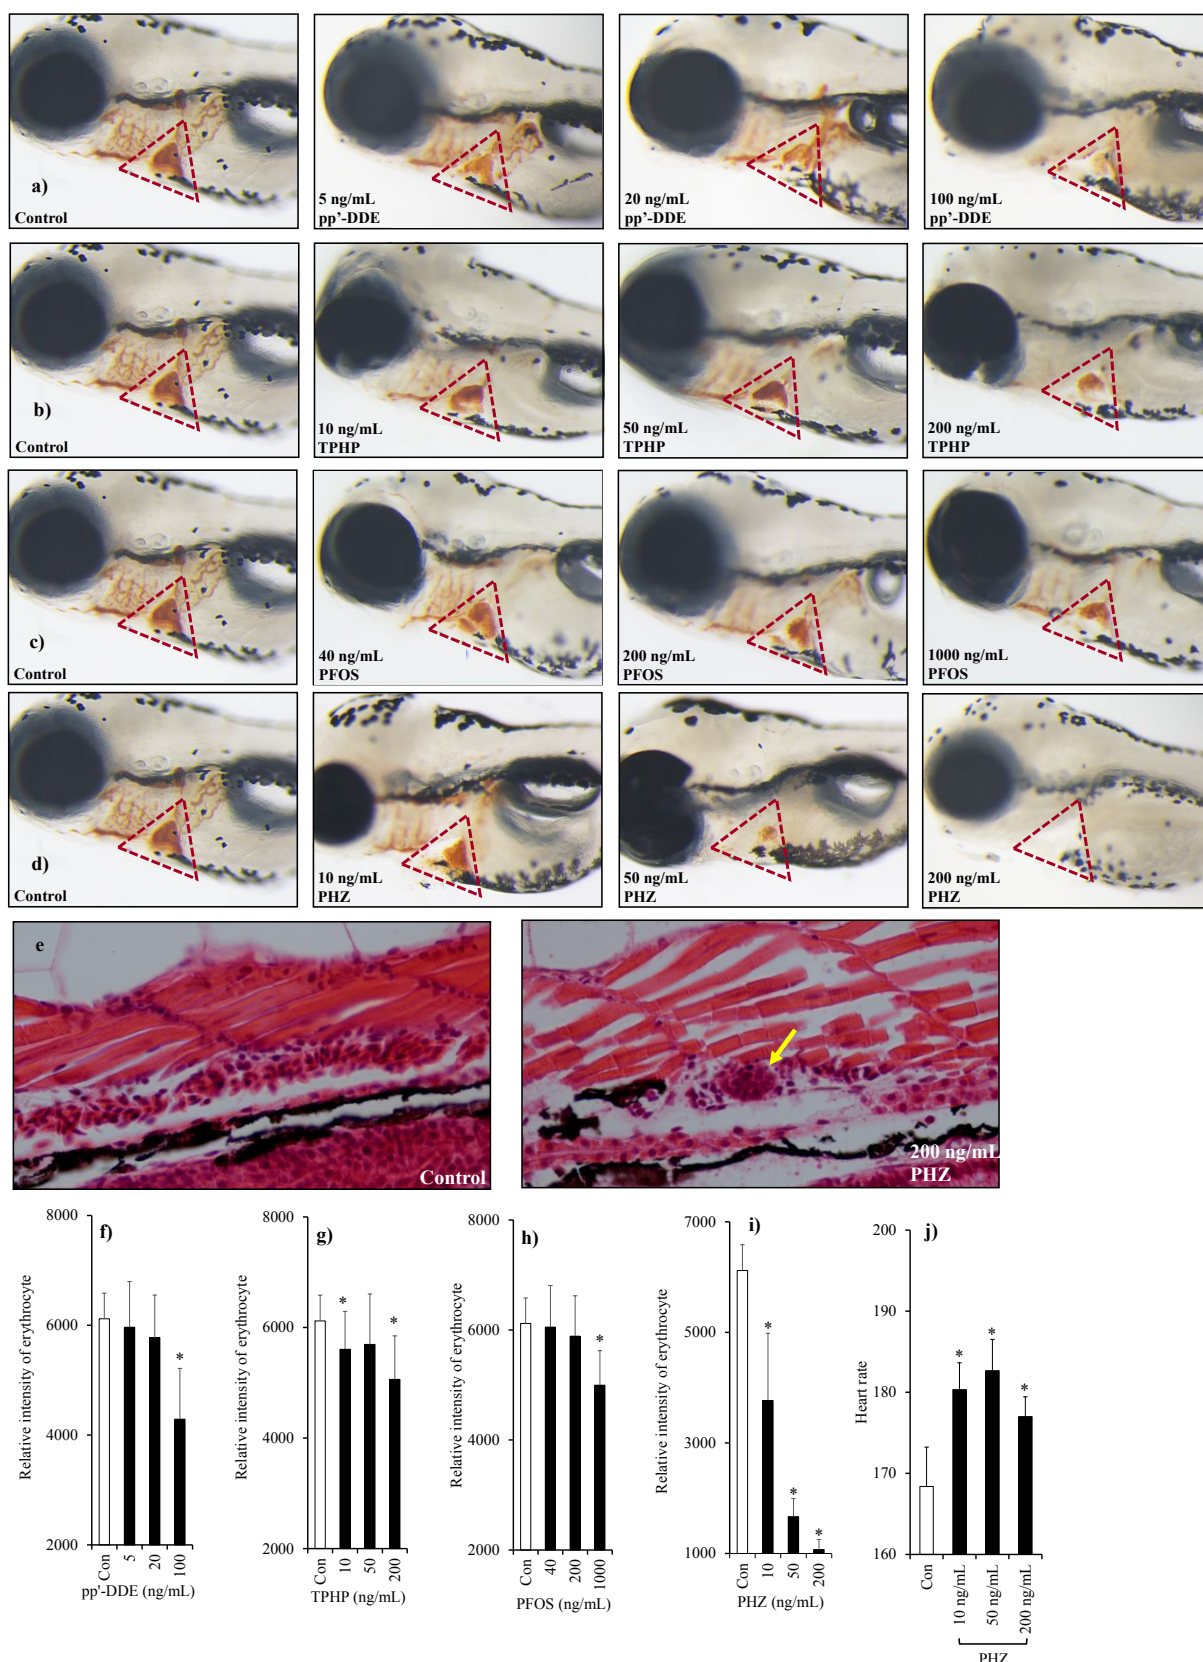

**Figure S34.** Metabolic disorders of CLs promote thrombosis. O-dianisidine staining of heart RBCs in zebrafish embryos exposed to pp'-DDE (a), TPHP (b), PFOS (c) and PHZ (d) at different concentrations. Histopathological examination of thrombus in blood vessels of zebrafish embryo exposed to PHZ (i). RBC intensities in response to exposure to pp'-DDE (f),

479 TPHP (g), PFOS (h) and PHZ (i) at different concentrations. (j) Heart rates in zebrafish embryos  
480 exposed to PHZ.  
481

## REFERENCES

1. Gao, S.; Wan, Y.; Li, W.; Huang, C. Visualized networking of co-regulated lipids in human blood based on high-throughput screening data: implications for exposure assessment. *Environ. Sci. Technol.* **2019**, *53*, 2862-2872.
2. Koeberlin, M. S.; Snijder, B.; Heinz, L. X.; Baumann, C. L.; Fauster, A.; Vladimer, G. I.; Gavin, A. C.; Superti-Furga, G. A conserved circular network of coregulated lipids modulates innate immune responses. *Cell* **2015**, *162*, 170-183.
3. Kind, T.; Tsugawa, H.; Cajka, T.; Ma, Y.; Lai, Z.; Mehta, S. S.; Wohlgemuth, G.; Barupal, D. K.; Showalter, M. R.; Arita, M.; Fiehn, O. Identification of small molecules using accurate mass MS/MS search. *Mass. Spectrom. Rev.* **2018**, *37*, 513-532.
4. Caspi, R.; Altman, T.; Billington, R.; Dreher, K.; Foerester, H.; Fulcher, C. A.; Holland, T. A.; Keseler, I. M.; Kothari, A.; Kubo, A.; Krummenacker, M.; Latendresse, M.; Mueller, L. A.; Ong, Q.; Paley, S.; Subhraveti, P.; Weaver, D. S.; Weerasinghe, D.; Zhang, P.; Karp, P. D. The MetaCyc database of metabolic pathways and enzymes and the BioCyc collection of pathway/genome databases. *Nucleic Acids Res.* **2016**, *44*, D471-D480.
5. Alex, F.; Craig, K.; Emilia, L.; Timothy, J.; Vivian, L.; Hau, D. D.; Liu, P.; Gautam, B.; Ly, S.; Guo, A. C.; Xia, J.; Liang, Y.; Shrivastava, S.; Wishart, D. S. SMPDB: the small molecule pathway database. *Nucleic Acids Res.* **2010**, *38*, D480-D487.
6. Hu, W.; Jia, Y.; Kang, Q.; Peng, H.; Ma, H.; Zhang, S.; Hiromori, Y.; Kimura, T.; Nakanishi, T.; Zheng, L.; Qiu, Y.; Zhang, Z.; Wan, Y.; Hu, J. Screening of house dust from Chinese homes for chemicals with liver x receptors binding activities and characterization of atherosclerotic activity using an in vitro macrophage cell line and ApoE<sup>-/-</sup> mice. *Environ. Health. Persp.* (<https://doi.org/10.1289/EHP5039>)
7. Schymanski, E. L.; Jeon, J.; Gulde, R.; Fenner, K.; Ruff, M.; Singer, H. P.; Hollender, J. Identifying small molecules via high resolution mass spectrometry: communicating confidence. *Environ. Sci. Technol.* **2014**, *48*, 2097–2098.
8. Zheng, G.; Wan, Y.; Hu, J. Intrinsic clearance of xenobiotic chemicals by liver microsomes: assessment of trophic magnification potentials. *Environ. Sci. Technol.* **2016**, *50* 6343-6353.
9. Ashrap, P.; Zheng, G.; Wan, Y.; Li, T.; Hu, W.; Li, W.; Zhang, H.; Zhang, Z.; Hu, J. Discovery of a widespread metabolic pathway within and among phenolic xenobiotics. *Proc. Natl. Acad. Sci. USA* **2017**, *114*, 6062-6067.
10. Kang, Q.; Gao, F.; Zhang, X.; Wang, L.; Hu, J. Nontargeted identification of per- and polyfluoroalkyl substances in human follicular fluid and their blood-follicle transfer. *Environ. Int.* **2020**, *139*, 105686.
11. Varlet-Marie, E.; Ashenden, M. J.; Moerkeberg, J.; Vela, C.; Audran, M. Relevance of di(2-ethylhexyl)phthalate blood levels for blood transfusion detection. *Bioanalysis* **2014**, *6*, 1591-1595.
12. Zhao, F.; Chen, M.; Gao, F.; Shen, H.; Hu, J. Organophosphorus flame retardants in

- pregnant women and their transfer to chorionic villi. *Environ. Sci. Technol.* **2017**, *51*, 6489-6497.
13. Escarrone, A. L. V.; Caldas, S. S.; Soares, B. M.; Martins, S. E.; Primel, E. G.; Nery, L. E. M. A vortex-assisted mspd method for triclosan extraction from fish tissues with determination by LC-MS/MS. *Anal Methods-UK.* **2014**, *6*, 8306-8313.
  14. Notarnicola, M.; Misciagna, G.; Tutino, V.; Chiloiro, M.; Osella, A. R.; Guerra, V.; Bonfiglio, C.; Caruso, M. G. Increased serum levels of lipogenic enzymes in patients with severe liver steatosis. *Lipids. Health. Dis.* **2012**, *11*, 145.
  15. Cavalier, J.; Ransac, S.; Verger, R.; Buono, G. Inhibition of human gastric and pancreatic lipases by chiral alkylphosphonates. a kinetic study with 1,2-didecanoyl-sn-glycerol monolayer. *Chem. Phys. Lipids.* **1999**, *100*, 3-31.
  16. Mortaud, S.; Donsez-Darcel, E.; Roubertoux, P. L.; Degrelle, H. Murine steroid sulfatase (MSTS): purification, characterization and measurement by ELISA. *J. Steroid Biochem.* **1995**, *52*, 91-96.
  17. Cuendet, M.; Mesecar, A. D.; Dewitt, D. L.; Pezzuto, J. M. An ELISA method to measure inhibition of the COX enzymes. *Nat. Protoc.* **2006**, *1*, 1915-21.
  18. Zaragoza-García, O.; Guzmán-Guzmán, I. P.; Moreno-Godínez, M. E.; Navarro-Zarza, J. E.; Antonio-Vejar, V.; Ramírez, M.; Parra-Rojas, I. PON-1 haplotype (-108C>T, L55M, and Q192R) modulates the serum levels and activity PONase promoting an atherogenic lipid profile in rheumatoid arthritis patients. *Clin. Rheumatol.* **2020**, DOI: 10.1007/s10067-020-05218-w.
  19. Dennis, E. A.; Cao, J.; Hsu, Y. H.; Magriotti, V.; Kokotos, G. Phospholipase A<sub>2</sub> enzymes: physical structure, biological function, disease implication, chemical inhibition, and therapeutic intervention. *Chem. Rev.* **2011**, *111*, 6130-6185.
  20. Ren, M. D.; Phoon, C. K.; Schlame, M. Metabolism and function of mitochondrial cardiolipin. *Prog. Lipid Res.* **2014**, *55*, 1-16.
  21. Zhao, Y.; Chen, Y. Q.; Li, S. Y.; Konrad, R. J.; Cao, G. Q. The microsomal cardiolipin remodeling enzyme acyl-CoA lysocardiolipin acyltransferase is an acyltransferase of multiple anionic lysophospholipids. *J. Lipid Res.* **2009**, *50*, 945-956.
  22. Astudillo, A. M.; Balboa, M. A.; Balsinde, J. Selectivity of phospholipid hydrolysis by phospholipase A<sub>2</sub> enzymes in activated cells leading to polyunsaturated fatty acid mobilization. *BBA-Mol. Cell. Biol. L.* **2018**, *1864*, 772-783.
  23. Meroni, P. L.; Borghi, M. O.; Raschi, E.; Tedesco, F. Pathogenesis of antiphospholipid syndrome: understanding the antibodies. *Nat. Rev. Rheumatol.* **2011**, *7*, 330-339.
  24. Garcia, D.; Erkan, D. Diagnosis and management of the antiphospholipid syndrome. *New Engl J. Med.* **2018**, *378*, 2010-2021.
  25. Cheng, Y.; Austin, S. C.; Rocca, B.; Koller, B. H.; Coffman, T. M.; Grosser, T.; Lawson, J. A.; FitzGerald, G. A. Role of prostacyclin in the cardiovascular response to thromboxane A<sub>2</sub>. *Science* **2002**, *296*, 539-541.

- 559 26. Liu, H.; Chu, T.; Chen, L.; Gui, W.; Zhu, G. In vivo cardiovascular toxicity induced by  
560 acetochlor in zebrafish larvae. *Chemosphere* **2017**, *181*, 600-608.
- 561 27. Zhu, X.; Liu, H.; Guo, S.; Xia, B.; Song, R.; Lao, Q.; Xuan, Y.; Li, C. A zebrafish  
562 thrombosis model for assessing antithrombotic drugs. *Zebrafish* **2016**, *13*, 335-344.  
563
